1 **Conserved and specific genomic features of endogenous polydnviruses revealed by whole**  
2 **genome sequencing of two ichneumonid wasps**

3

4 Fabrice LEGEAI\*<sup>1,2</sup>, Bernardo F. SANTOS\*<sup>3</sup>, Stéphanie ROBIN\*<sup>1,2</sup>, Anthony  
5 BRETAUDEAU<sup>1,2</sup>, Rebecca B. DIKOW<sup>3,4</sup>, Claire LEMAITRE<sup>2</sup>, Véronique JOUAN<sup>5</sup>, Marc  
6 RAVALLEC<sup>5</sup>, Jean-Michel DREZEN<sup>6</sup>, Denis TAGU<sup>1</sup>, Gabor GYAPAY<sup>7</sup>, Xin ZHOU<sup>8</sup>,  
7 Shanlin LIU<sup>8,9</sup>, Bruce A. WEBB<sup>10</sup>, Seán G. BRADY<sup>3</sup> and Anne-Nathalie VOLKOFF<sup>§5</sup>.

8 \* Co-first authors; §Corresponding author

9

10 **Affiliations:**

11 1. IGEPP, Agrocampus Ouest, INRA, Université de Rennes 1, 35650 Le Rheu, France

12 2. Université Rennes 1, INRIA, CNRS, IRISA, F-35000 Rennes, France

13 3. Department of Entomology, National Museum of Natural History, Smithsonian Institution,  
14 10th and Constitution Avenue NW, Washington, DC 20560-0165, USA

15 4. Data Science Lab, Office of the Chief Information Officer, Smithsonian Institution, 10th and  
16 Constitution Avenue NW, Washington, DC 20560-0165, USA

17 5. DGIMI, INRA, University of Montpellier, Montpellier, France

18 6. Institut de Recherche sur la Biologie de l'Insecte, UMR 7261, CNRS - Université de Tours,  
19 UFR des Sciences et Techniques, Parc de Grandmont, Tours, France.

20 7. Commissariat à l'Energie Atomique (CEA), Institut de Génomique (IG), Genoscope, 2 rue  
21 Gaston Crémieux, BP5706, Evry 91057, France

22 8. Department of Entomology, China Agricultural University, Beijing 100193, People's  
23 Republic of China

24 9. China National GeneBank, BGI-Shenzhen, Shenzhen, Guangdong Province, 518083,  
25 People's Republic of China

26 10. Department of Entomology, University of Kentucky, Lexington, USA

27

28

29 **Authors e-mail addresses**

- 30 Fabrice LEGEAI, [fabrice.legeai@inra.fr](mailto:fabrice.legeai@inra.fr) (co-first author)
- 31 Bernardo F. SANTOS, [bernardofsantos@gmail.com](mailto:bernardofsantos@gmail.com) (co-first author)
- 32 Stéphanie ROBIN, [stephanie.robin@inra.fr](mailto:stephanie.robin@inra.fr) (co-first author)
- 33 Anthony BRETAUDEAU, [anthony.bretauudeau@inra.fr](mailto:anthony.bretauudeau@inra.fr)
- 34 Rebecca B. DIKOW, [dikowr@si.edu](mailto:dikowr@si.edu)
- 35 Claire LEMAITRE, [claire.lemaitre@inria.fr](mailto:claire.lemaitre@inria.fr)
- 36 Véronique JOUAN, [veronique.jouan@inra.fr](mailto:veronique.jouan@inra.fr)
- 37 Marc RAVALLEC, [marc.ravallec@inra.fr](mailto:marc.ravallec@inra.fr)
- 38 Jean-Michel DREZEN, [drezen@univ-tours.fr](mailto:drezen@univ-tours.fr)
- 39 Denis TAGU, [denis.tagu@inra.fr](mailto:denis.tagu@inra.fr)
- 40 Gabor GYAPAY, [gabor@genoscope.cns.fr](mailto:gabor@genoscope.cns.fr)
- 41 Xin ZHOU, [xinzhoucaddis@icloud.com](mailto:xinzhoucaddis@icloud.com)
- 42 Shanlin LIU, [shanlin1115@gmail.com](mailto:shanlin1115@gmail.com)
- 43 Bruce A. WEBB, [bawebb@email.uky.edu](mailto:bawebb@email.uky.edu)
- 44 Seán G. BRADY, [bradys@si.edu](mailto:bradys@si.edu)
- 45 Anne-Nathalie VOLKOFF, [anne-nathalie.volkoff@inra](mailto:anne-nathalie.volkoff@inra) (corresponding author)

46

47

48

49

50

51

52

53

54

55

56 **Abstract (250 words).** Polydnviruses (PDVs) are mutualistic endogenous viruses associated  
57 with some lineages of parasitoid wasps that allow successful development of the wasps within  
58 their hosts. PDVs include two taxa resulting from independent virus acquisitions in braconid  
59 (bracoviruses) and ichneumonid wasps (ichnoviruses). PDV genomes are fully incorporated  
60 into the wasp genomes and comprise (1) virulence genes located on proviral segments that are  
61 packaged into the viral particle, and (2) genes involved in the production of the viral particles,  
62 which are not encapsidated. Whereas the genomic organization of bracoviruses within the wasp  
63 genome is relatively well known, the architecture of endogenous ichnoviruses remains poorly  
64 understood. We sequenced the genome of two ichnovirus-carrying wasp species, *Hyposoter*  
65 *didymator* and *Campoletis sonorensis*. Complete assemblies with long scaffold sizes allowed  
66 identification of the integrated ichnovirus, highlighting an extreme dispersion within the wasp  
67 genomes of the viral loci, *i.e.* isolated proviral segments and clusters of replication genes.  
68 Comparing the two wasp species, proviral segments harbor distinct gene content and variable  
69 genomic environment, whereas viral machinery clusters show conserved gene content and  
70 order, and can be inserted in collinear wasp genomic regions. This distinct architecture is  
71 consistent with the biological properties of the two viral elements: proviral segments producing  
72 virulence proteins allowing parasitism success are fine-tuned to the host physiology, while an  
73 ancestral viral architecture was likely maintained for the genes involved in virus particle  
74 production. Finding a distinct genomic architecture of ichnoviruses and bracoviruses highlights  
75 different evolutionary trajectories leading to virus domestication in the two wasp lineages.

76

77 **Keywords (3-10)**

78 endogenous virus architecture, ichnovirus, polydnvirus, parasitoid wasp, virus domestication

79

80

81

82

83

84

## 85 **Background**

86 Host-parasite interactions are one of the most fundamental ecological relationships, and yet one  
87 of the most complex from a mechanistic and evolutionary perspective. Hosts and parasites are  
88 involved in a continual coevolutionary arms race, with hosts evolving various defense  
89 mechanisms and parasites developing strategies to overcome them [1, 2]. Identifying the  
90 genomic basis of such adaptations is crucial to understand the dynamics of host-parasite  
91 interactions [3]. In fact, the cycle of adaptations and counter-adaptations involved in parasitism  
92 scenarios can result in complex biological strategies with far-reaching consequences at the  
93 genomic level. The use of endogenous viruses by parasitoid wasps represents a notable example  
94 of how complex host-parasite interactions can result in novel genomic adaptations.

95 Parasitoid wasps are among the most successful groups of parasitic organisms, potentially  
96 comprising several hundred thousand species and playing major ecological roles in terrestrial  
97 ecosystems [4]. While the adult wasps are free-living, at their immature stages they develop as  
98 parasites of other arthropods, eventually killing their host. Many groups of parasitoids are  
99 “koinobiont” parasitoids, which means that they develop inside a host that continues to develop  
100 after being parasitized, so that the wasp larva needs to deal with the immune system and  
101 physiology of the developing host. In order to cope with this biological constraint, some  
102 lineages of parasitic wasps have developed an astonishing strategy to manipulate their host by  
103 employing mutualistic viruses from the Polydnviridae (PDVs) family.

104 PDVs are unusual viruses with a packaged genome composed of several circular molecules, or  
105 “segments”, of double-stranded DNA (hence the name “poly-dna virus”). They have been  
106 reported in the hyperdiverse wasp families Braconidae and Ichneumonidae. Ichnoviruses (IV)  
107 are associated with ichneumonid wasps from the subfamilies Campopleginae and Banchinae,  
108 whereas the bracoviruses (BVs) are associated with braconid wasps from the “microgastroid  
109 complex” [5, 6]. IVs and BVs differ in their morphology and gene content, but share a common  
110 life cycle [7]. The viral particles are produced exclusively within specialized cells located in  
111 the calyx region of the ovary during wasp female pupation. Mature virions are secreted into the  
112 oviduct lumen and transferred into the host during oviposition. Once the parasitoid’s host,  
113 usually a caterpillar, is infected, PDVs do not replicate but expressed genes induce profound  
114 physiological alterations in the parasitized host, such as impairment of the immune response or  
115 developmental alterations, which are required for successful development of the wasp larva [8-  
116 12].

117 The DNA segments enclosed in PDV particles have been sequenced from purified particles for  
118 several PDVs (see review in [9]). The segments consist in circular DNA molecules generated  
119 from template sequences integrated in the wasp genome [13, 14]. Currently, knowledge on how  
120 PDVs are organized into the wasp genome mainly concerns the bracoviruses [15]. It is known  
121 that most of the BV proviral segments are distributed in clusters or “macro-loci”, in which viral  
122 segments are organized in tandem arrays, separated by regions of intersegmental DNA that are  
123 not encapsidated [16-18]. In contrast, there is still very little information on the distribution and  
124 organization of ichnoviruses within the wasp genome.

125 PDV proviral sequences are amplified and circularized giving rise to the segments packaged in  
126 the particles by mechanisms still poorly understood. In bracoviruses, segment production  
127 involves direct repeated sequences present at the ends of each proviral segment [19, 20]. These  
128 “direct repeat junctions” (DRJs), also named “wasp integration motifs” (WIM), are conserved  
129 between BV segments [21]. Presence of direct repeats has also been reported at the extremities  
130 of IV segments [22, 23], but this finding was restricted to a few segments and so far there is no  
131 evidence of a conserved motif in IV DRJs, suggesting that segment excision may rely on  
132 different mechanisms in the two groups of PDV.

133 PDV insertions in the wasp genome do not consist only of proviral segments, but also include  
134 genes not packaged in the virion involved in the production of the virus particles [24-26]. These  
135 “viral machineries” derive from ancestral viruses endogenized by parasitic wasps, and they  
136 differ between BVs and IVs. BV-associated braconid wasps rely on a set of endogenous  
137 nudiviral genes to produce the BV particles [24]. The similarity of BV replication genes to  
138 nudivirus genes and their well-known baculovirus homologues made it possible to predict and  
139 test their function. It was thus shown that the nudivirus genes maintained in the wasps were  
140 mainly those encoding structural proteins; those involved in DNA replication have apparently  
141 been lost [24, 27]. These nudivirus-like insertions have also been shown to be more dispersed  
142 in the wasp genome compared to the proviral segments [27]. In contrast, the viral ancestor of  
143 IVs is not closely related to known pathogenic viruses: a series of conserved genes involved in  
144 IVs particle formation has been clearly identified but they show no similarity with known viral  
145 genes [26]. These genes are organized within the wasp genome in large clusters named  
146 “Ichnovirus Structural Proteins Encoding Regions” (IVSPER; [26]). So far, three IVSPERs  
147 enclosing approximately 40 genes have been identified in the campopleginae *Hyposoter*  
148 *didymator* [26] and in the banchinae *Glypta fumiferanae* [28], based on sequencing of  
149 corresponding regions from the wasp genomes (using a BAC approach). However, how

150 IVSPERs are distributed within the wasp genome in not known and other IVSPERs might  
151 remain undisclosed.

152 Elucidating how viral insertions are distributed and organized in the wasp genomes is important  
153 to fully characterize the machinery that produces PDVs, a necessary step toward understanding  
154 the mechanisms that have driven the “domestication” of viruses in parasitic wasps. Yet, there  
155 is a dearth of information regarding the distribution of IV sequences in IV-carrying wasp  
156 genomes. For example, are IV proviral segments also clustered in replication units like the ones  
157 found in BVs? Are there conserved recombination motifs analogous to those seen in BVs? Is  
158 the position and gene composition of IVSPERs conserved across wasp species within the same  
159 lineage? Since IVs and BVs derive from the integration of unrelated viral ancestors, comparing  
160 their genomic characteristics can provide insights on whether similar selection forces have  
161 operated on the domestication of the two types of ancestral viruses.

162 To answer these questions, we sequenced the genome of two ichneumonid wasps from the  
163 subfamily Campopleginae, *Hyposoter didymator* and *Campoletis sonorensis*. Both species are  
164 parasitoids of larvae of owlet moths (Lepidoptera, Noctuidae) and are associated with  
165 endogenous ichnoviruses (respectively, HdIV and CsIV) putatively descending from a common  
166 viral ancestral integration. Both HdIV and CsIV genomes packaged in virus particles have been  
167 formerly Sanger sequenced ([29] for CsIV; [30] for HdIV) showing they share homologous  
168 genes. For both wasp species, we assembled high quality genomes that allowed us to decipher  
169 the genome architecture of the endogenous IVs, and to point out differences with that of BVs.  
170 In addition, comparison of the IV genome organization and gene content in the two  
171 campoplegine wasps indicated strong conservation of the virus-derived replicative machinery  
172 whereas the sequences packaged in the IV particles are far more divergent and species specific.  
173 These first data relative to genomic architecture of endogenous IVs represent a first crucial step  
174 in our understanding of IV evolution.

175

## 176 **Results**

### 177 ***Hyposoter didymator and Campoletis sonorensis genomes share common features***

178 Whole genome sequencing was performed from haploid male wasp DNA using Illumina Hiseq  
179 technology. Assembly of the sequenced reads was conducted using either Supernova v.2.1.1  
180 [31] or Platanus assembler v1.2.1 [32], depending on the species (see Methods section). The  
181 draft assembled genome of *H. didymator* consists of 199 Mb in 2,591 scaffolds ranging in size

182 from 1 Kbp to 15.7 Mbp, with a scaffold N50 of 3.999 Mbp and a contig N50 of 151,312 bp  
183 (Table 1). The *C. sonorensis* assembled genome consists of 259 Mb in 11,756 scaffolds with  
184 sizes ranging from 400 bp to 6.1 Mbp, with an N50 of 725,399 bp and a contig N50 of 315,222  
185 bp (Table 1). For both ichneumonid species, G+C content was similar to most other parasitoid  
186 species (between 33.6% and 39.5%) (Table 1).

187 Transposable elements (TE) represent 15.09 % of *H. didymator* and 17.38% of *C. sonorensis*  
188 genomes. The major TE groups (LTR, LINE, SINE retrotransposons, and DNA transposons)  
189 contribute to 54 % of the total TE coverage in *H. didymator* and up to 79% in *C. sonorensis*  
190 (Table 2). The two wasp species differ by the number of class 1 elements (retrotransposons),  
191 which was higher in *C. sonorensis* (46% of the TEs) compared to *H. didymator* genome (24%  
192 of the TEs).

193 Automatic gene annotation for *H. didymator* (for which RNAseq datasets were available) and  
194 for *C. sonorensis* (for which no RNAseq dataset was available) yielded 18,119 and 21,915  
195 transcripts, respectively (Table 3). Although different software packages were used for gene  
196 prediction, the two species have similar gene annotation statistics, except for the transcript size,  
197 which is longer in *H. didymator*, which also shows a higher predicted intron size (Table 3).  
198 BUSCO analyses indicate a high level of completeness of the two genome assemblies and  
199 annotations, with 99% of the BUSCO Insecta protein set (1,658 proteins) identified as complete  
200 sequences (Figure 1A).

201 Orthologous protein sequence families were calculated with Orthofinder by computing each  
202 pairs' similarity among the genomes of different parasitoid wasps from the ichneumonid and  
203 braconid families, harboring polydnviruses or not. For *H. didymator* and *C. sonorensis*, a total  
204 number of ~10,000 orthogroups was identified (Figure 1B, Additional file 1A). The  
205 orthogroups included a large majority of the *H. didymator* (87.1%) and *C. sonorensis* (71.4%)  
206 genes. Amongst those, only a small portion corresponded to species-specific orthogroups: 11  
207 orthogroups for *H. didymator* (69 genes) and 36 for *C. sonorensis* (288 genes). The number of  
208 shared orthogroups declines with the increasing evolutionary distance among the other species  
209 (from *Venturia canescens* to *Drosophila*, Additional file 1B). Amongst the orthogroups shared  
210 by *H. didymator* and *C. sonorensis* genes, 313 were specific to these two IV-carrying species  
211 (Figure 1B, Additional file 1C), representing 875 proteins for *C. sonorensis* and 509 proteins  
212 for *H. didymator*.



213 Global synteny analysis demonstrated the existence of a number of syntenic blocks between the  
214 two genomes, enabling the evaluation of the magnitude of the genomic reorganization between  
215 the two species even when using fragmented assemblies. When comparing the *C. sonorensis*  
216 and *H. didymator* genomes, the mean number of genes per synteny block obtained is 11.2, one  
217 of the highest pairwise values for the evaluated species, just below *F. arisanus* and *D. alloeum*  
218 (Figure 1B, right panel; Additional file 2). The percentage of regions in syntenic blocks shared  
219 between *C. sonorensis* and *H. didymator* compared to the complete genome size is respectively  
220 67% for *H. didymator* and 50% for *C. sonorensis* (Figure 1B, right panel). Finally, the  
221 percentage of genes within syntenic blocks is respectively 71% for *H. didymator* and 54% for  
222 *C. sonorensis* (Figure 1B, right panel). These observed high pairwise values suggest that global  
223 collinearity of *H. didymator* and *C. sonorensis* genomes is well conserved.

224

### 225 ***The two campoplegine genomes include numerous and dispersed ichnovirus loci***

226 In the assembled *C. sonorensis* genome, a total of 35 scaffolds, ranging in size from 2.3 Kbp to  
227 more than 6 Mbp, contained CsIV sequences (Figure 2A, Additional file 3). Within these  
228 scaffolds, 40 viral loci were identified, corresponding either to CsIV segments or, for the first  
229 time in this species, to IVSPERs or IVSPER genes. A total of 31 proviral segments were  
230 recognized, with sizes varying from 6.4 to 23.2 Kbp (Additional file 3). Compared to the CsIV  
231 segments described in Webb et al., 2006, two segments were not found, and eight novel  
232 segments were identified (Table 4). Noteworthy, two short scaffolds each contained a repeat  
233 element gene (i.e. a member of a gene family encoded by IV segments), corresponding probably  
234 to additional viral segments (Table 4). Altogether, *C. sonorensis* genome contained 33 loci  
235 corresponding to CsIV proviral segments. In addition, we identified seven gene clusters  
236 corresponding to IVSPERs comprising 48 genes located in six different scaffolds; these  
237 IVSPERs varied in size from 8.6 Kbp to 33.3 Kbp (Additional files 3 and 4).

238 In the *H. didymator* assembled genome, a total of 60 viral loci were identified (Figure 2B); they  
239 were located in 32 scaffolds ranging in size from 1.5 Kbp to over 15 Mbp (Additional file 3).  
240 A total of six IVSPERs were identified, which size varies from 1.6 Kbp to 26.6 Kbp; these *H.*  
241 *didymator* viral regions included three novel IVSPERs (more precisely two clusters and an  
242 isolated gene), for a total of 54 IVSPER predicted genes (Additional file 4). All the HdIV  
243 segments previously described in HdIV packaged genome [30] were identified in the wasp  
244 genome (Table 4). Some pairs of previously described segments actually co-localized at the



245 same locus (in most cases, the segments shared part of their sequence, Figure 3A). Four  
246 segments were present in two copies (Figure 3B), three had copies in two different scaffolds,  
247 one was tandemly duplicated (Hd9). Finally, six totally new segments were identified in *H.*  
248 *didymator* genome. Altogether, 55 HdIV proviral segments were found, ranging in size from  
249 2.0 to 17.9 Kbp (Additional file 3).

250 Whole wasp genomes sequencing thus reveals a very large number of viral loci widely  
251 dispersed in these genomes. DNA fragments of viral origin are separated by large portions of  
252 wasp sequences, with a median size of 115.1 Kb between segments for those located on the  
253 same scaffold (Figure 4A). To confirm by an independent approach that IV proviral segment  
254 sequences were dispersed across the wasp genome, a FISH experiment was conducted for *H.*  
255 *didymator*, using genomic clones enclosing viral sequences as probes. Four probes were used,  
256 containing respectively segments Hd11, Hd6, Hd30 and Hd29, all in different genomic  
257 scaffolds. Results show that each of the probes hybridized with a different chromosome (Figure  
258 4B), indicating that HdIV segments are indeed widely dispersed across the genome of *H.*  
259 *didymator*.

260 To assess whether dispersion of the viral loci could have been mediated during genome  
261 evolution by transposable elements, distribution of TEs was investigated in the regions  
262 surrounding the proviral segments. The analysis of the families of transposable elements in the  
263 regions surrounding the proviral segments (Additional file 5) did not reveal any particular  
264 enrichment that could suggest a role of TEs in the dispersion of the IV sequences in the wasp  
265 genomes.

266

### 267 ***Ichnovirus DRJs show variable architecture and multiple excision sites***

268 Repeated sequences flanking the proviral segment (or DRJ, for direct repeat junction) were  
269 found for all HdIV segment loci, except for Hd45.1 and Hd45.2. HdIV DRJs varied largely in  
270 size, ranging from 69 bp to 949 bp (Additional file 6). Similarly, most CsIV segments (25 of  
271 32) were flanked by DRJs, which ranged in size from 99 bp to as much as 1,132 bp (Additional  
272 file 6). The number of direct repeats for a given proviral sequence was also variable (Figure  
273 5A, Additional file 6). The majority of the HdIV (28) and CsIV (19) segments contained a  
274 single direct repeated sequence, one copy located on their right and left ends (named DRJ1R  
275 and DRJ1L, respectively; Figure 5A, a). A few HdIV and CsIV segments also contained internal  
276 repeats of the same sequence (hence named DRJ1int), potentially allowing the generation of

277 more than one related circular molecules by recombination between the different DRJ1 copies  
278 (nested segments). Other IV proviral segments (21 HdIV segments, but only one CsIV segment)  
279 contained two different repeated sequences, named DRJ1 and DRJ2 (Figure 5A, b), combined  
280 or not with internal DRJs (Figure 5A, c; Additional file 6). Presence of several repeats differing  
281 in sequence and in position suggests the possibility that a mixture of overlapping and/or nested  
282 segments may be generated by homologous recombination in this context.

283 We used the DMINDA webserver [33] to search for conserved excision site motifs embedded  
284 in IV DRJ sequences, using the all set of DRJs (99 DRJs) available for the two wasp species.  
285 Some motifs were found, in particular one that occurred at least once in almost all the analyzed  
286 DRJs (Additional file 7A). However, this motif may occur several times within a single DRJ;  
287 furthermore, a search across the whole *H. didymator* genome revealed that there was not a  
288 significantly higher chance for this motif to occur in the DRJ rather than in the rest of the wasp  
289 genome (Additional file 7B). Hence, circularization of IV segments does not seem to rely on  
290 the presence of a conserved nucleotide motif.

291 The two copies of the DRJ present at each end of the segment in the linear integrated form  
292 exhibit some punctual differences, so the excision site or breakpoint can be identified in a given  
293 recombined DRJ sequence with more or less resolution depending on the divergence between  
294 the parental DRJ copies. To identify potential excision sites in IV circular molecules, we  
295 analyzed two sets of *H. didymator* segment sequences using the DrjBreakpointFinder method  
296 developed for this purpose (see Methods section). The automatic analysis of a large set of  
297 recombined DRJ sequences revealed that excision could occur in different sites within a same  
298 DRJ (Figure 5B, 5C). This finding was confirmed by manual analysis of a subset of 8 segments  
299 sequenced using Sanger technology (Additional file 7C). Interestingly some positions of  
300 excision sites appeared more frequent than others for a given DRJ (Figure 5B, 5C).

301

### 302 ***Proviral sequences serving as template for IV packaged genome show species-specific*** 303 ***features***

304 The number of proviral loci identified in *H. didymator* genome is higher (n=54) than in *C.*  
305 *sonorensis* genome (n=33). Altogether, IV segment loci represent a total size of 307.1 Kbp for  
306 HdIV and 314.1 Kbp for CsIV. The total sizes of the endogenous viruses are slightly  
307 underestimated since two HdIV segments (Hd1 and Hd45.1) and five CsIV segments (CsV,  
308 CsX3, CsX4, CsX5 and CsX7) were only partially identified because of the fragmentation of

309 the genomes (see Additional file 3 for details). CsIV segments are globally longer compared to  
310 HdIV segments (Figure 6 A, B); they enclose 111 predicted genes whereas a total of 152 genes  
311 were predicted in the HdIV segments (Table 5, Additional file 4). Both encapsidated genomes  
312 contain a similar number of genes considering the IV-conserved multimembers families  
313 (repeat-element genes, vankyrins, vinnexins, cys-motif and N-genes (Table 5). HdIV contain  
314 more viral innexins, whereas CsIV more viral ankyrins and repeat-element genes (Table 5).

315 The high collinearity in gene order observed between the genomes of *H. didymator* and *C.*  
316 *sonorensis* made it possible to assess if the viral insertions were located in the same genomic  
317 environment for the two species. In order to accomplish this, the genomic regions containing  
318 viral insertions in *H. didymator* were compared to their syntenic genomic regions in *C.*  
319 *sonorensis* (Figure 6C). For the large majority of syntenic blocks containing an HdIV segment,  
320 there was no viral insertion in the corresponding *C. sonorensis* block (Figure 6C, a). Two  
321 exceptions were found. The first is the insertion site of *H. didymator* segment Hd18 which is  
322 located in the same genomic environment as the one where IVSPER-5 was inserted in *C.*  
323 *sonorensis* genome (Figure 6C, b). The second concerns *H. didymator* segment Hd17, inserted  
324 in a wasp genomic region that corresponded to the region, but not the insertion site, where *C.*  
325 *sonorensis* segment CsZ was inserted (Figure 6C, c).

326

### 327 ***The ichnovirus machinery retained in wasp genomes (IVSPERs) is well conserved***

328 A total of 45 different predicted IVSPER gene families were identified in the genomes of *H.*  
329 *didymator* and *C. sonorensis* (Figure 7A, Additional file 4). The majority (35, or 78%) are  
330 shared by both wasp species (Figure 7A) and 64% (29/45) are also shared with the banchine  
331 *Glypta fumiferanae* (Figure 7A). Amongst the 36 different genes/gene families (corresponding  
332 to a total of 48 genes) identified in the *C. sonorensis* genome, only one had no homolog in *H.*  
333 *didymator* genome. This gene, named Gf\_U27L, has similarities (BlastP e-value 1E-31) with  
334 an IVSPER gene described in the banchine wasp *G. fumiferanae* [28]. On the other hand,  
335 amongst the 44 distinct genes/gene families identified in *H. didymator* genome (corresponding  
336 to 54 genes), nine were not detected in the *C. sonorensis* genome. Amongst them, three genes,  
337 U29, U32 and U33, are newly described for *H. didymator*. They were classified as IVSPER  
338 genes because of their localization in IVSPER-4 and, based on the transcriptome data generated  
339 for genome annotation, they are transcribed in *H. didymator* ovarian tissue. Note that among

340 the homologous genes shared by *H. didymator* and *C. sonorensis*, the number of gene copies  
341 within some multigene families differs between the two wasp species (Figure 7A).

342 The IVSPERs of the two species show high synteny (Figure 7B). Synteny blocks with  
343 conserved gene order are shared for instance between Hd\_IVSPER-2 and Cs\_IVSPER-2 but  
344 also Cs\_IVSPER-3 with part of Hd\_IVSPER-1 and part of Cs\_IVSPER-1 with Hd\_IVSPER-  
345 3. Despite syntenic portions, there are some rearrangements, inversions and deletions between  
346 the two species. The highest number of rearrangements concerns the Cs\_IVSPER-1 and  
347 Cs\_IVSPER-4. The homologs of Cs\_IVSPER-1 genes are dispersed in several different *H.*  
348 *didymator* IVSPERs (U15, IVSP1, U37, U31, U35). Similarly, *H. didymator* U3 and U25 have  
349 orthologs in Cs\_IVSPER-2.

350 The genomic regions containing *H. didymator* IVSPER loci (Figure 7C) corresponds in most  
351 cases to synteny blocks where the gene order is well conserved compared with *C. sonorensis*;  
352 notably, this gene order is also quite well conserved in the IV-free campoplegine wasp *V.*  
353 *canescens*, and to some extent in the braconid wasps *M. demolitor* and *F. arisanus* (Figure 7C).  
354 For two of the three *H. didymator* genomic regions containing IVSPERs, some viral insertion  
355 sites were conserved between *H. didymator* and *C. sonorensis*. Regarding the insertion site of  
356 Hd\_IVSPER-1 and -2 (Figure 6C, a), no corresponding *C. sonorensis* scaffold was found,  
357 making the comparison inconclusive. However, the comparison of the two other *H. didymator*  
358 genomic regions with their corresponding *C. sonorensis* syntenic blocks (Figure 7C b and c),  
359 revealed conservation of the insertion site for IVSPER-4 and IVSPER-5, whereas *H. didymator*  
360 and *C. sonorensis* IVSPER-3 are located in different wasp genomic regions.

361

## 362 **Discussion**

363 The genome assemblies described here are of high quality with contig N50 over 150,000 bp  
364 and scaffold N50 from 1 to 4 Mbp. The annotated gene sets are similar in terms of numbers of  
365 genes and estimated completeness compared to genomes of other parasitic wasps. The  
366 assembled genomes allowed us to perform a comprehensive mapping of the viral inserts into  
367 the wasp genome.

368 The first major finding is the dispersion of the ichnovirus loci. This was particularly true for the  
369 IV proviral segments. All the 32 CsIV segments loci are located in different scaffolds, except  
370 CsG and CsG2, present in the same scaffold. For HdIV, half of the 54 viral segments are located  
371 in different scaffolds and for those located in the same scaffold, they are most frequently

372 separated by relatively long portions of wasp genome. This dispersion was confirmed by FISH  
373 experiments, showing that viral loci are distributed across various chromosomes. We therefore  
374 did not find in the ichneumonid genomes any viral macro-locus as reported for bracoviruses  
375 [16]. Indeed, in braconid genomes, the BV segments are for the most part clustered in a unique  
376 locus gathering tens of segments, organized in replication units. For instance, the braconids  
377 *Glyptapanteles indiensis* and *G. flavicoxis* genomes contain 29 proviral segments, with 70% of  
378 them residing in a single large macrolocus [34]. Similarly, the *M. demolitor* genome contains  
379 26 proviral segments; they are organized in 8 replication units located at 8 loci, loci 1 containing  
380 14 segments [27]. In stark contrast, IV genomes consist of a series of single viral segments  
381 scattered within the wasp genome. In addition, as no enrichment of transposable elements in  
382 the surrounding of the IV segments have been observed, their dispersal in the wasp genome  
383 may result either from a diffuse integration of the virus ancestors or multiple genomic  
384 rearrangements events.

385 As previously described, the proviral segments are sequences that are packaged and transferred  
386 to the parasitized host whereas the IVSPER genes correspond to the “replication” genes,  
387 involved in the production of the virus particle. Until now, replication genes were known solely  
388 for one campoplegine wasp, *H. didymator* [26], and one banchine, *G. fumiferanae* [28]. Our  
389 study discovered replication genes in the *C. sonorensis* genome and showed a conserved  
390 IVSPER architecture for the two campoplegine wasps. In both *H. didymator* and *C. sonorensis*  
391 genomes, the majority of the replication genes are clustered. Indeed, only two isolated genes  
392 were identified in the *C. sonorensis* genome and only one in the *H. didymator* genome. In  
393 addition, *H. didymator* and *C. sonorensis* contain common genes arranged in a quite well  
394 conserved order. Noteworthy, most campoplegine IVSPER genes are also present in the  
395 banchine *G. fumiferanae*; however, the gene order is less conserved when comparing the two  
396 wasp subfamilies [9]. The high proportion of shared IVSPER genes between campoplegine and  
397 banchine wasps, including the D5 primase-like and DEDXhelicase-like first described in *G.*  
398 *fumiferanae* (corresponding to U37 and U34 respectively in *H. didymator*), tend to favor the  
399 hypothesis of a common virus ancestor for campoplegine and banchine IVs. This is quite  
400 notable, considering that the two subfamilies do not form a monophyletic group [35, 36] and  
401 IVs are not reported for other subfamilies in the same lineage. The divergences in IVSPER gene  
402 order between campoplegine and banchine reflects the phylogenetic distance between the  
403 species, with the viral loci evolving by genomic rearrangements specific to each of the  
404 ichneumonid subfamilies. Better understanding of the evolutionary trajectories of IVSPERs

405 across ichneumonid lineages requires additional sequencing of banchine wasp genomes, as well  
406 as a thorough screening of species from other subfamilies for the presence of endogenous  
407 viruses.

408 Our study now provides the ability to make direct comparisons of viral composition between  
409 ichneumonid and braconid genomes. The genomes of campoplegine wasps associated with IVs  
410 contain numerous dispersed viral loci consisting of single viral segments and clusters of  
411 replication genes. By contrast, genomes of braconid wasps associated with BVs have clustered  
412 viral segments and more dispersed replication genes. For example, 76 nudiviral genes were  
413 identified in *M. demolitor*; half of these are located in a “nudiviral cluster” while the remainder  
414 are single genes located on different genome scaffolds [17]. This alternative genomic  
415 architecture probably reflects different regulatory mechanisms governing viral replication and  
416 particle production of the two PDV taxa. In braconids, the organization of the viral segments in  
417 replication units allow simultaneous co-amplification of several segments [21, 37] whereas in  
418 ichneumonids, each segment is individually amplified by a mechanism yet to be identified.  
419 IVSPERs DNA is also specifically amplified in the replicative ovarian tissue [26], what  
420 participates to increase gene copy number and thus to increase transcription levels. However,  
421 gene copy number is not the only mechanism involved in transcriptional control; IVSPER genes  
422 differ in their expression level in *H. didymator* calyx [38], suggesting that gene specific  
423 mechanisms are also involved in IVSPER gene expression regulation. In the case of  
424 bracoviruses, transcriptional control by nudiviral RNA polymerase allows expression of viral  
425 genes whatever their location, whereas amplification of the genes at the nudiviral locus allows  
426 achieving high levels of expression among nudiviral genes [25]. Although transcriptional  
427 control may not necessary require that genes are clustered in given regions, the clustering of  
428 replication genes in ichneumonids may facilitate coordinated regulation of their expression.

429 In *H. didymator* and *C. sonorensis* genomes, terminal and internal DRJs have been identified  
430 for most of the proviral segments. DRJs present at the extremities of the integrated form of the  
431 viral segment have been first described for CsIV [22] and the BVs associated with *Chelonus*  
432 *inanitus* [39] and *Cotesia congregata* [20]. The presence of internal repeats, which allows the  
433 generation of multiple circular molecules from the same proviral template in a process termed  
434 “segment nesting”, has also been reported, mainly for IV [22] and rarely for BVs [16].

435 In the case of bracoviruses, where segments are organized in a macro-locus, DRJs are thought  
436 to be involved downstream during replication. A first excision probably occurs thanks to  
437 sequences that limit the replication units in which there are also conserved sites [37]. Then the



438 DRJs would serve to separate the different BV segments and generate the circular molecules.  
439 For ichnoviruses, where the proviral segments are individually amplified, there is no data  
440 presently on the limits of the replication units, making difficult to assess if DRJs are directly  
441 involved in the excision of the segment, or if there is also a two-step process involving other  
442 sequences.

443 Interestingly, some segments lack terminal repeats, mostly for CsIV (five segments of the 32  
444 identified). This is particularly true for four CsIV segments newly identified; they are viral in  
445 nature since they all contain the IV characteristic repeat-element genes. The lack of one of their  
446 terminal repeats suggest they had lost their ability to be excised; this hypothesis would be  
447 consistent with the fact that they have not been revealed when the CsIV packaged genome was  
448 sequenced [29]. A similar finding was found in the braconid *Cotesia congregata* which harbors  
449 a pseudo-segment (CcBV pseudo-segment 34) mutated in the DRJ core which do not produce  
450 a packaged circle, whereas its homologous segment in *Cotesia sesamiae* produces a molecule  
451 packaged in the CsBV particle [16]. The fifth CsIV segment lacking DRJs is ShC, a segment  
452 that conversely to the four others, has been reported as part of the CsIV packaged genome [29].  
453 In the present work, we found that ShC is embedded into IVSPER-2, i.e. corresponds to a region  
454 encoding replication genes which is, in addition, also conserved in *H. didymator* IVSPER-2  
455 [26]. When we compared the ~2 Kbp regions encompassing the pseudo ShC segment and  
456 flanking wasp sequences, no similarity was found (the only nucleotide motif repeated in  
457 IVSPER-2 was a 170 nt long motif located between U6L and U7L in one side, and within U25L  
458 on the other side). The absence of repeated sequence suggests that this sequence is not excised  
459 but part of an IVSPER.

460 Another important finding highlighted by our work is the documentation of inter-segment  
461 variability of DRJs in terms of sequence length, number and organization. Hence some HdIV  
462 segments harbored two different repeated sequences, and/or one or several internal repeats. This  
463 complexity suggests numerous possibilities to produce by intrachromosomal homologous  
464 recombination a series of related circular molecules that will be packaged in the particles. IV  
465 DRJs vary in size, ranging from less than 100 bp to more than 1 Kbp and in similarity rate, with  
466 identity between pairs of related DRJs varying from 70 to 98% (Additional file 6). The rate of  
467 homologous recombination between DNA fragments is affected by sequence length and  
468 divergence (reviewed in [40]); thus variability of IV segment DRJs length and homology rate  
469 suggests that homologous recombination efficacy may vary from one segment to the other.  
470 While for bracoviruses the DRJs contain a conserved tetramer AGCT embedded within a larger



471 motif, which corresponds to the site of excision [17, 41], we did not identify a conserved motif  
472 specific to IV DRJs. On the other hand, an automatic search of the excision sites using the  
473 algorithm developed in the present study allowed us to posit various possible sites of excision  
474 and recombination within a given DRJ. Interestingly, some sites seemed to occur more  
475 frequently than others. However, for now, the mechanism and the proteins involved in DNA  
476 double-strand breaks and repair in IV sequences remains to be identified. In the case of  
477 bracoviruses, there are conserved DRJ sequences, and conserved members of the tyrosine  
478 recombinase family of nudiviral origin (*vlf-1*, *int-1* and *int-2*) which seem involved in  
479 regulating excision [25]. In the case of ichnoviruses, there are neither conserved sites nor known  
480 virus-derived recombinases. For now, it is not possible to infer a function to many of the  
481 IVSPER genes, so it is not possible to determine if IV excision relies on the same mechanisms  
482 as bracoviruses; possibly, homologous recombination and generation of IV circular molecules  
483 rely on the wasp cellular machinery.

484 Two main conclusions arise from the comparison of the two genomes, giving insights on the  
485 evolutionary forces driving IV domestication in campoplegine wasps. At first, the genes  
486 potentially involved in producing the IV particles are very well conserved in terms of gene  
487 content and gene order (Figure 7). Hence, only nine of the 54 predicted replication genes in *H.*  
488 *didymator* are specific to this species; they correspond in majority to short sequences and may  
489 for some not be truly functional IVSPER genes, however they are all transcribed in calyx cells  
490 based on our transcriptome analyses. In both *H. didymator* and *C. sonorensis*, there is only a  
491 few clusters, and one or two isolated genes. Noteworthy, the isolated gene in *H. didymator* is  
492 U37, a homolog of the D5 primase gene described in the banchine *G. fumiferanae* where this  
493 gene is embedded within an IVSPER (*Gf-IVSPER-1*; [28]). One of the two U37 homologs in  
494 *C. sonorensis* is also isolated, but in a genomic context distinct from that in *H. didymator*,  
495 whereas the other is localized in *Cs-IVSPER-1* (Figure 7). Gene order within the clusters is  
496 well conserved between *H. didymator* and *C. sonorensis*, even though these regions underwent  
497 rearrangements over evolution. Compared to the IVSPERs, the viral segments carrying  
498 virulence genes appear more divergent and species-specific, despite the existence of common  
499 gene families. The two components of the ichnoviral genome also differ in terms of  
500 conservation of their genomic localization. First, we did not find any viral segment inserted in  
501 a given block of synteny when comparing *H. didymator* and *C. sonorensis*. The situation of  
502 viral segments in ichneumonids therefore seems different from that described in braconids,  
503 where the viral segments remain in homologous positions, flanked by conserved wasp genes

504 [16]. In ichneumonids, viral segment diversification and dispersion may result from  
505 transposition of each viral sequence in the wasp genome while for bracoviruses, segment  
506 multiplication occurs by duplication of large areas [16]). By contrast, two of the five IVSPERs  
507 were localized in the same genomic context in *H. didymator* and *C. sonorensis* (Figure 7C).  
508 These two IVSPER harbor related genes, what suggests a common ancestral origin. These loci  
509 may represent ancestral viral insertion sites that are still conserved in both wasp genomes. For  
510 the others, the lack of co-localization indicates that IVSPERs are able to move quite easily in  
511 the wasp recipient genomes. Note that we were not able to highlight transposable element (TE)  
512 enrichment close to viral insertions, suggesting that transposition of viral sequences may rely  
513 on another still unknown mechanism which might have been inherited from the ancestor virus.

514 The conservation of IVSPER genes is consistent with what would be expected from a functional  
515 point of view: they constitute the machinery allowing the wasp to produce the particles, i.e. the  
516 delivery systems on which the parasitoid relies for its survival. As such, mechanisms for viral  
517 replication and packaging are not expected to be subject to rapid change. Meanwhile, proviral  
518 segments carry virulence genes, which need to quickly respond to counter-adaptations arising  
519 in the immune system of the parasitoid host. Since campoplegines are koiniobiont  
520 endoparasitoids that often have a restricted host range [42, 43], proviral sequences are expected  
521 to evolve rapidly and in a species-specific manner. Finally, we did find that a same syntenic  
522 block contained a proviral segment in *H. didymator* and an IVSPER in *C. sonorensis*. In a  
523 scenario of a common origin between IVSPER and viral segments (i.e. the ancestral virus), this  
524 locus may represent an ancestral viral insertion site, which may have contained sequences  
525 corresponding to the complete ancestral virus genome before its separation in two components,  
526 the proviral segments and the replication gene clusters.

527

## 528 **Conclusions**

529 Whole genome sequencing of two parasitoid wasps, *H. didymator* and *C. sonorensis*, which  
530 both harbor integrated ichnoviruses, is reported here for the first time. These are the first  
531 annotated full genomes available for the family Ichneumonidae. Most importantly, they allowed  
532 us to piece together a comprehensive picture of the architecture of ichnoviruses in the wasp  
533 genomes. Our results reveal an interesting duality between specific genomic features shown by  
534 the proviral elements of the polydnavirus genome and the conserved nature of the viral  
535 machinery within the wasp DNA. While this may be linked to the biological functions of these

536 two types of genomic elements, this genomic organization is directly opposed to that observed  
537 in bracoviruses, highlighting how similar solutions to adaptive demands can convergently arise  
538 via very different evolutionary pathways. Tracing the steps that have led to the architecture of  
539 modern ichnoviruses from the domestication of an ancestral virus will require the sequencing  
540 of other ichneumonid wasps from multiple lineages.

541

## 542 **Methods**

### 543 *Target species and insect rearing*

544 Two species from the putatively monophyletic subfamily Campopleginae [35, 36] were chosen  
545 as target taxa for whole genome sequencing: *Hyposoter didymator* occurs in all Western Europe  
546 and mainly parasitizes *Helicoverpa armigera* [44] whereas *C. sonorensis* occurs from North to  
547 South America and parasitizes several noctuid species [45].

548 Specimens of *Hyposoter didymator* were reared on *Spodoptera frugiperda* larvae as previously  
549 described [30]. Male specimens of *Campoletis sonorensis* wasps were furnished from a colony  
550 maintained at the University of Kentucky and reared as described in Krell et al. [46].

551

### 552 *C. sonorensis whole genome sequencing, assembly and automatic annotation*

553 Genomic DNA was extracted from one single adult male using the Qiagen™ MagAttract HMW  
554 DNA kit, following the manufacturer's guidelines. The resulting extraction was quantified  
555 using a Qubit™ dsDNA High Sensitivity assay, and DNA fragment size was assessed using an  
556 Agilent™ Genomic DNA ScreenTape. Sample libraries were prepared using 10X Genomics  
557 Chromium technology (10X Genomics, Pleasanton, CA), followed by paired-end (150 base  
558 pairs) sequencing using one lane on an Illumina HiSeqX sequencer at the New York Genome  
559 Center (Additional file 9A).

560 Assembly of the sequenced reads was conducted using Supernova v.2.1.1 [31]. Reads were  
561 mapped back to the assembled genome using Long Ranger  
562 ([https://support.10xgenomics.com/genome-exome/software/pipelines/latest/what-is-long-](https://support.10xgenomics.com/genome-exome/software/pipelines/latest/what-is-long-ranger)  
563 [ranger](https://support.10xgenomics.com/genome-exome/software/pipelines/latest/what-is-long-ranger)) and error correction was performed by running Pilon [47]. Note that Supernova  
564 recommends 56X total coverage and sequencing deeper than 56X reduces the assembly quality.  
565 A full lane of HiSeqX produced several times the sequencing data we needed to reconstruct the

566 genome. Hence, raw reads were divided in four subsets and four separate assemblies were  
567 conducted in parallel, with the best one chosen for downstream analyses.

568 We used RepeatMasker [48], to identify repeat regions using *Drosophila* as the model species.  
569 *H. didymator* transcripts were aligned to the *C. sonorensis* genome using BLAT [49]. We  
570 created hints files for Augustus from the repeat-masked genome and the BLAT alignments. We  
571 also ran BUSCO v3 [50] with the `-long` option both to assess genome completeness and to  
572 generate a training set for Augustus. We then ran Augustus v3.3 [51] for gene prediction using  
573 the three lines of evidence, the RepeatMasker-generated hints, the BLAT-generated hints, and  
574 the BUSCO-generated training set.

575

576 *H. didymator whole genome sequencing, assembly and automatic annotation*

577 Genomic DNA was extracted from a batch of adult males (n=30). DNA extractions that passed  
578 sample quality tests were then used to construct 3 paired-end (inserts lengths = 250, 500 and  
579 800 bp) and 2 mate pairs (insert length = 2,000 and 5,000 bp) libraries, and qualified libraries  
580 were used for sequencing using Illumina HiSeq 2500 technology (Additional file 9B) at the  
581 BGI. For genome assembly, the raw data was filtered to obtain high quality reads.

582 The reads were assembled with Platanus assembler v1.2.1 [32], in 2 steps (contigs assembly  
583 and scaffolding), then the scaffolds gaps were filled with SOAPdenovo GapCloser 1.12 [52].  
584 Finally, only scaffolds longer than 1,000 bp were kept for further analyzes. Assemblathon2 [53]  
585 was used to calculate metrics of genome assemblies.

586 For annotation, EST reads from venom and ovaries, as well as reads obtained using GS FLX  
587 (Roche/454), Titanium chemistry from total insects [54] were mapped to the genome with  
588 GMAP [55], and Illumina reads published previously [38], or from the 1KITE consortium  
589 (<http://1kite.org/subprojects.html>) using STAR [56], and new calyx RNA-Seq (SRA accession:  
590 PRJNA590863) with TopHat2 v2.1.0 [57]. BRAKER1 v1.10 [58] was used to predict genes in  
591 the genome of *H. didymator* using default settings. Gene annotation was evaluated using  
592 Benchmarking Universal Single-Copy Orthologue (BUSCO) version 3.0.2 [50] with a  
593 reference set of 1,658 proteins (conserved in Insecta).

594 The other parasitoid genomes used in this work for comparison purposes were similarly  
595 analyzed (genomes available at NCBI for *Microplitis demolitor* [27] (PRJNA251518), *Fopius*  
596 *arisanus* [59] (PRJNA258104), *Diachasma alloeum* [60] (PRJNA306876) and *Nasonia*

597 *vitripennis* [61] (PRJNA13660); *Venturia canescens* genome [62] available at  
598 [https://bipaa.genouest.org/sp/venturia\\_canescens/](https://bipaa.genouest.org/sp/venturia_canescens/)).

599

#### 600 *Manual annotation of the viral loci*

601 Manual annotation of viral regions was done using the genome annotation editor Apollo  
602 browser [63] available on the BIPAA platform (<https://bipaa.genouest.org>). The encapsidated  
603 forms of the HdIV and CsIV genomes were previously Sanger-sequenced by isolating DNA  
604 from virions [29, 30]. *H. didymator* IVSPER were also previously sequenced [26]. To identify  
605 the viral loci, sequences available at NCBI for campoplegine IV segments and IVSPER  
606 sequences from campoplegine and banchine species were used to search the *H. didymator* and  
607 *C. sonorensis* genome scaffolds using the Blastn tool implemented in the Apollo interface. To  
608 determine the limits of the proviral segments, we searched for direct repeats at the ends of the  
609 viral loci by aligning the two sequences located at each end using the Blastn suite at NCBI. The  
610 start or stop codons of the genes located at the ends of the IVSPER loci were considered as the  
611 borders of the IVSPER.

612

#### 613 *Transposable Element Detection*

614 Transposable Elements (TEs) were identified in *H. didymator* and *C. sonorensis* genomes using  
615 the REPET pipeline [64, 65]. The enrichment analysis was performed using LOLA [66]  
616 comparing the observed number of each TE family member in a region encompassing IV  
617 segments and 10 kbp around, and 1,000 random segments of the same length extracted with  
618 bedtools shuffle [67].

619

#### 620 *Orthologous genes and syntenic regions*

621 To identify homology relationships between sequences of *H. didymator*, *C. sonorensis* and  
622 other parasitoids with available genomes (*Venturia canescens*, *Microplitis demolitor*, *Fopius*  
623 *arisanus*, *Diachasma alloeum* and *Nasonia vitripennis*), as well as taxonomically restricted  
624 sequences (*Apis mellifera* and *Drosophila melanogaster*), a clustering was performed using the  
625 orthogroup inference algorithm OrthoFinder version 2.2.7 [68]. Sequences predicted by  
626 automatic annotation (Braker or Augustus) but also some resulting from manual annotations  
627 were used. Thus a total of 18,154 protein coding genes for *H. didymator* and 21,987 for *C.*

628 *sonorensis* were included in the analysis (Table 4A). The syntenic blocks were reconstructed  
629 with Synchro [69] using the genomes and proteomes of the same species.

630

#### 631 *H. didymator* genomic BAC library construction and sequencing

632 Genomic BAC clones were obtained as described in [26]. Briefly, high molecular weight DNA  
633 was extracted from *H. didymator* larval nuclei embedded in agarose plugs. The nuclei were  
634 lysed and the proteins degraded by proteinase K treatment. DNA was partially digested with  
635 *Hind*III. The size of the fragments obtained averaged 40 kbp as controlled by Pulse Field Gel  
636 Electrophoresis. Fragments were ligated into the pBeloBAC11 vector. High-density filters were  
637 spotted (18,432 clones spotted twice on nylon membranes) and screened using specific 35-mer  
638 oligonucleotides. Positive clones were analyzed by fingerprint and, for each probe, one genomic  
639 clone was selected and sequenced using Sanger technology (shotgun method) by the  
640 Génoscope, Evry, France. The sequences obtained were then submitted to a Blastn similarity  
641 search against NCBI nr database in order to confirm presence of HdIV sequences. Four BAC  
642 clones containing HdIV sequences were used as probes in FISH experiments (see below).

643

#### 644 *Fluorescent in situ hybridization (FISH) on H. didymator chromosomes*

645 The *H. didymator* genome is composed of 12 chromosomes [70]. Karyotypes were prepared  
646 from male reproductive tracts from pupae and young adults. The testes were dissected in saline  
647 solution and placed in colchicine/colcemid solution (50ug / ml) during 10 minutes. After  
648 elimination of the liquid, a hypotonic solution (Na citrate 0.5%) was added during 10 minutes.  
649 The solution was then replaced by fixative (1 vol. acetic acid / 3 vol. methanol) and let to  
650 incubate during 40 minutes. The genitalia were then placed on a glass slide, a drop of acetic  
651 acid 60% was added to further shred the tissue and the slide was placed on a hot plate at 42°C  
652 until complete evaporation of the liquid. The samples were stained with DAPI and observed  
653 under a fluorescent microscope in order to select slides with sufficient and suitable caryotypes.  
654 Two genomic clones containing a viral sequence (CE-15P20 and CF-16G11) were used as  
655 probes. They were alternatively labeled using the Dig RNA labeling mix (Roche) or the biotin  
656 RNA labeling mix (Roche). For hybridization, the samples were rehydrated and denatured  
657 during 6 minutes by a 0,07 N NaOH treatment. The anti-digoxigenin antibody was labeled with  
658 rhodamine (Roche) (dilution 1/50) and the anti-biotin antibody with FITC (Vector laboratories)



659 (dilution 1/200) overnight at 37°C. Images were captured on a Zeiss AxioImager Apotome  
660 microscope.

661

#### 662 *Re-sequencing of HdIV packaged genome*

663 The viral DNA was extracted following the procedure described in Volkoff *et al.* [71]. Briefly,  
664 ovaries from about 100 female wasps were dissected in PBS and placed in a 1.5-ml microfuge  
665 tube. The final volume was adjusted to 500 µl using Tris-EDTA buffer and the ovaries were  
666 homogenized by several passages through a 23-gauge needle. The resulting suspension was  
667 passed through a 0.45-µm pore-size cellulose acetate filter to recover the HdIV viral particles.  
668 For viral DNA extraction, the filtrate was submitted to proteinase K and Sarcosyl treatment  
669 overnight at 37°C, then to RNase A treatment 2 h at 37°C. DNA was further extracted with  
670 phenol/chloroform/isoamyl alcohol and precipitated with ethanol. The DNA pellet was re-  
671 suspended in ultra-pure water and was sequenced using GS FLX (Roche/454), Titanium  
672 chemistry (Eurofins Genomics). The obtained reads were used for DRJ excision site analyses  
673 (see below).

674

#### 675 *DRJs and breakpoint analysis in H. didymator*

676 The proviral integrated segments are circularized and excised by homologous recombination  
677 between its extreme DRJs (at left and right extremities of the given segment). When the two  
678 copies of the DRJ exhibit some punctual differences, the excision site or breakpoint can be  
679 identified in a given recombined DRJ sequence with more or less resolution depending on the  
680 level of divergence between the DRJ copies.

681 In order to identify and analyze DRJ excision sites of a set of circularized IV sequences in an  
682 automatic fashion, we developed the following method, called DrjBreakpointFinder and freely  
683 distributed at [http:// github.com/stephanierobin/DrjBreakpointFinder/](http://github.com/stephanierobin/DrjBreakpointFinder/). The method takes as  
684 input a set of circularized sequences (usually obtained by sequencing) and a reference genome.  
685 It is composed of two main steps. The first step consists in identifying triplets of sequences  
686 (read-DRJL-DRJR) representing the recombined DRJ and its two parental DRJs, by mapping  
687 the sequencing reads to the reference genome. In the second step, a precise multiple alignment  
688 is computed for each sequence triplet and a segmentation algorithm, inspired from the  
689 breakpoint refinement method Cassis [72, 73], is applied along the recombined DRJ sequence  
690 to identify in the best case scenario the excision site or more generally the breakpoint region.



691 To do so, the segmentation algorithm estimates the best partition of the recombined DRJ  
692 sequence into three distinct segments, corresponding to homology with DRJR, the breakpoint  
693 region and homology with DRJL respectively, given the repartition of punctual differences with  
694 the two parental DRJs. The segmentation algorithm is classically based on fitting a piecewise  
695 constant function with two changepoints to the punctual difference signal (see [73]).  
696 DrjBreakpointFinder further gathers breakpoint results by proviral segments or DRJ pairs, in  
697 order to obtain for each the distribution of potential excision sites observed in a given circular  
698 virus sequencing dataset. The output of DrjBreakpointFinder consists of breakpoint region  
699 coordinate files along with visual representations for each proviral segment or DRJ pair.

700 In this paper, DrjBreakpointFinder was applied to two circular viral DNA sequencing datasets.  
701 Circular DNA was extracted from HdIV particles and sequenced by 454 and Sanger  
702 technologies, resulting in 40,343 and 15,575 reads, respectively.

703 In addition, the DRJ copy was manually analyzed for a subset of 8 segments (Hd12, Hd16,  
704 Hd19, Hd22, Hd24, Hd28, Hd29 and Hd30) that presented only one right and left DRJs in their  
705 integrated form. Junctions were amplified by PCR using primers located within the viral  
706 sequence, downstream and upstream the DRJs. PCR products were cloned in pGEM and 3 to 5  
707 plasmid clones were then sequenced using Sanger technology for each segment. The obtained  
708 recombined junction sequences were then aligned with the 2 parental DRJs in an attempt to  
709 localize the excision site, based on the nucleotides differing between the 2 DRJs (see Additional  
710 file 5, C).

711

## 712 **Declarations**

713 **Ethics approval and consent to participate:** Not applicable

714 **Consent for publication:** Not applicable

715 **Availability of data and materials:** The datasets supporting the conclusions in this article are  
716 available at the NCBI under the Bioproject accession numbers PRJNA589497 for *Hyposoter*  
717 *didymator* and PRJNA590982 for *Campoletis sonorensis*. The DrjBreakpointFinder method  
718 developed in this study is freely distributed at [http://](http://github.com/stephanierobin/DrjBreakpointFinder)  
719 [github.com/stephanierobin/DrjBreakpointFinder](http://github.com/stephanierobin/DrjBreakpointFinder). All other data are included within this article  
720 and its additional files.

721 **Competing interests:** The authors declare that they have no competing interest.

722 **Funding:** Funding of the work on *H. didymator* has been in part provided by ANR (ABC-  
723 PaPoGen, ref. ANR-12-ADAP-0001) and AIP-INRA project (GenomeInsect, AIP  
724 BIORESSOURCES 2012).

725 **Author's contributions:** FL, SR and RD were responsible for the assembly of whole genomes  
726 and automatic annotations, and AB for database management. ANV annotated manually the  
727 endogenous viral sequences. BAW furnished *C. sonorensis* samples. BFS did the DNA  
728 extraction and QC for *C. sonorensis*. VJ did the *H. didymator* DNA extractions; XZ and SL  
729 supervised whole genome sequencing of this species. SR was responsible for the BUSCO and  
730 gene orthology analyses. FL was responsible for transposable element and synteny analyses.  
731 GG managed the *H. didymator* BACs sequencing. CL developed the pipeline for DRJ analyses  
732 and SR has performed the DRJ analyses. MR and VJ conducted the FISH experiments. ANV  
733 and BFS were responsible for the project conception, funding and management. ANV wrote  
734 the manuscript with large participation of BFS, FL and SR. DT, XZ, CL, SGB and JMD  
735 contributed to improve the manuscript. All authors read and approved the final manuscript.

736 **Acknowledgements:** The authors thanks Drs Jing ZHAO and Ming TANG, from the BGI-  
737 Shenzhen, China, for their help with *H. didymator* genome sequencing. The Sackler Institute of  
738 Comparative Genomics (AMNH) funded the generation of preliminary data for *C. sonorensis* and  
739 made the final genome sequencing available at reduced cost through their partnership with the New  
740 York Genome Center. We thank Clotilde GIBARD and Gaétan CLABOTS from the DGIMI  
741 insectarium for the insects they have furnished, and the quarantine insect platform (PIQ), member  
742 of the Vectopole Sud network, for providing the infrastructure needed for experimentations on  
743 insects. The authors acknowledge Séverine CHAMBEYRON and Christine BRUN (IGH,  
744 Montpellier) for their great help in *H. didymator* FISH experiments. From the DGIMI lab, we also  
745 thank Isabelle DARBOUX for help with figure 4, Kiwoong NAM for constructive comments at the  
746 early stages of the MS writing, and Bertille PROVOST who performed the genomic DNA extraction  
747 for *H. didymator* BAC library preparation. We thank Mercer Brugler (NYC College of Technology)  
748 and Mark Siddall (AMNH) for their enthusiastic incentive and guidance at the early stages of this  
749 project.

750

## 751 **References**

- 752 1. Brockhurst MA, Chapman T, King KC, Mank JE, Paterson S, Hurst GD. Running with  
753 the Red Queen: the role of biotic conflicts in evolution. *Proc Biol Sci.* 2014;281(1797).
- 754 2. Nuismer SL, Otto SP. Host-parasite interactions and the evolution of gene expression.  
755 *PLoS Biol.* 2005;3(7):e203.

- 756 3. Greenwood JM, Ezquerra AL, Behrens S, Branca A, Mallet L. Current analysis of host-  
757 parasite interactions with a focus on next generation sequencing data. *Zoology (Jena)*.  
758 2016;119(4):298-306.
- 759 4. Forbes AA, Bagley RK, Beer MA, Hippee AC, Widmayer HA. Quantifying the  
760 unquantifiable: why Hymenoptera, not Coleoptera, is the most speciose animal order. *Bmc*  
761 *Ecol*. 2018;18.
- 762 5. Whitfield JB. Molecular and morphological data suggest a single origin of the  
763 polydnviruses among braconid wasps. *Naturwissenschaften*. 1997;84(11):502-7.
- 764 6. Whitfield JB. Estimating the age of the polydnvirus/braconid wasp symbiosis. *P Natl*  
765 *Acad Sci USA*. 2002;99(11):7508-13.
- 766 7. Strand MR, Burke GR. Polydnviruses: Nature's Genetic Engineers. *Annu Rev Virol*.  
767 2014;1:333-54.
- 768 8. Beckage NE, Gelman DB. Wasp parasitoid disruption of host development:  
769 implications for new biologically based strategies for insect control. *Annu Rev Entomol*.  
770 2004;49:299-330.
- 771 9. Darboux I, Cusson M, Volkoff AN. The dual life of ichnoviruses. *Curr Opin Insect Sci*.  
772 2019;32:47-53.
- 773 10. Turnbull M, Webb B. Perspectives on polydnvirus origins and evolution. *Adv Virus*  
774 *Res*. 2002;58:203-54.
- 775 11. Webb B. Polydnvirus Biology, Genome Structure, and Evolution. In: Miller LK, Ball  
776 LA, editors. *The Insect Viruses* New York, USA: Springer; 1998. p. 105-39.
- 777 12. Webb B, Strand MR. The biology and genomics of polydnviruses. In: Gilbert LI, Iatrou  
778 K, Gill SS, editors. *Comprehensive Molecular Insect Science*. San Diego, USA: Elsevier Press;  
779 2005. p. 260-323.
- 780 13. Belle E, Beckage NE, Rousselet J, Poirie M, Lemeunier F, Drezen JM. Visualization of  
781 polydnvirus sequences in a parasitoid wasp chromosome. *J Virol*. 2002;76(11):5793-6.
- 782 14. Fleming JG, Summers MD. Polydnvirus DNA is integrated in the DNA of its parasitoid  
783 wasp host. *Proc Natl Acad Sci U S A*. 1991;88(21):9770-4.
- 784 15. Strand MR, Burke GR. Polydnviruses: From discovery to current insights. *Virology*.  
785 2015;479:393-402.
- 786 16. Bezier A, Louis F, Jancek S, Periquet G, Theze J, Gyapay G, et al. Functional  
787 endogenous viral elements in the genome of the parasitoid wasp *Cotesia congregata*: insights  
788 into the evolutionary dynamics of bracoviruses. *Philos Trans R Soc Lond B Biol Sci*.  
789 2013;368(1626):20130047.
- 790 17. Burke GR, Walden KK, Whitfield JB, Robertson HM, Strand MR. Widespread genome  
791 reorganization of an obligate virus mutualist. *PLoS Genet*. 2014;10(9):e1004660.
- 792 18. Desjardins CA, Gundersen-Rindal DE, Hostetler JB, Tallon LJ, Fadrosch DW, Fuester  
793 RW, et al. Comparative genomics of mutualistic viruses of *Glyptapanteles* parasitic wasps.  
794 *Genome Biol*. 2008;9(12):R183.
- 795 19. Annaheim M, Lanzrein B. Genome organization of the *Chelonus inanitus* polydnvirus:  
796 excision sites, spacers and abundance of proviral and excised segments. *J Gen Virol*. 2007;88(Pt  
797 2):450-7.
- 798 20. Savary S, Beckage N, Tan F, Periquet G, Drezen JM. Excision of the polydnvirus  
799 chromosomal integrated EP1 sequence of the parasitoid wasp *Cotesia congregata* (Braconidae,  
800 Microgastinae) at potential recombinase binding sites. *J Gen Virol*. 1997;78 ( Pt 12):3125-34.
- 801 21. Burke GR, Simmonds TJ, Thomas SA, Strand MR. *Microplitis demolitor* Bracovirus  
802 Proviral Loci and Clustered Replication Genes Exhibit Distinct DNA Amplification Patterns  
803 during Replication. *J Virol*. 2015;89(18):9511-23.

- 804 22. Cui L, Webb BA. Homologous sequences in the *Campoletis sonorensis* polydnavirus  
805 genome are implicated in replication and nesting of the W segment family. *J Virol.*  
806 1997;71(11):8504-13.
- 807 23. Rattanadachakul W, Webb BA. Characterization of *Campoletis sonorensis* ichnovirus  
808 unique segment B and excision locus structure. *J Insect Physiol.* 2003;49(5):523-32.
- 809 24. Bezier A, Annaheim M, Herbinier J, Wetterwald C, Gyapay G, Bernard-Samain S, et  
810 al. Polydnaviruses of braconid wasps derive from an ancestral nudivirus. *Science.*  
811 2009;323(5916):926-30.
- 812 25. Burke GR, Thomas SA, Eum JH, Strand MR. Mutualistic polydnaviruses share essential  
813 replication gene functions with pathogenic ancestors. *PLoS Pathog.* 2013;9(5):e1003348.
- 814 26. Volkoff AN, Jouan V, Urbach S, Samain S, Bergoin M, Wincker P, et al. Analysis of  
815 virion structural components reveals vestiges of the ancestral ichnovirus genome. *PLoS Pathog.*  
816 2010;6(5):e1000923.
- 817 27. Burke GR, Walden KKO, Whitfield JB, Robertson HM, Strand MR. Whole Genome  
818 Sequence of the Parasitoid Wasp *Microplitis demolitor* That Harbors an Endogenous Virus  
819 Mutualist. *G3 (Bethesda).* 2018;8(9):2875-80.
- 820 28. Beliveau C, Cohen A, Stewart D, Periquet G, Djoumad A, Kuhn L, et al. Genomic and  
821 Proteomic Analyses Indicate that *Banchine* and *Campoplegine* Polydnaviruses Have Similar, if  
822 Not Identical, Viral Ancestors. *J Virol.* 2015;89(17):8909-21.
- 823 29. Webb BA, Strand MR, Dickey SE, Beck MH, Hilgarth RS, Barney WE, et al.  
824 Polydnavirus genomes reflect their dual roles as mutualists and pathogens. *Virology.*  
825 2006;347(1):160-74.
- 826 30. Doremus T, Cousserans F, Gyapay G, Jouan V, Milano P, Wajnberg E, et al. Extensive  
827 Transcription Analysis of the *Hyposoter didymator* Ichnovirus Genome in Permissive and Non-  
828 Permissive Lepidopteran Host Species. *Plos One.* 2014;9(8).
- 829 31. Weisenfeld NI, Kumar V, Shah P, Church DM, Jaffe DB. Direct determination of  
830 diploid genome sequences. *Genome Res.* 2017;27(5):757-67.
- 831 32. Kajitani R, Toshimoto K, Noguchi H, Toyoda A, Ogura Y, Okuno M, et al. Efficient de  
832 novo assembly of highly heterozygous genomes from whole-genome shotgun short reads.  
833 *Genome Res.* 2014;24(8):1384-95.
- 834 33. Yang JY, Chen X, McDermaid A, Ma Q. DMINDA 2.0: integrated and systematic views  
835 of regulatory DNA motif identification and analyses. *Bioinformatics.* 2017;33(16):2586-8.
- 836 34. Gundersen-Rindal D, Dupuy C, Huguet E, Drezen JM. Parasitoid polydnaviruses:  
837 evolution, pathology and applications. *Biocontrol Science and Technology.* 2013;23:1-61.
- 838 35. Bennett AMR, Cardinal S, Gauld ID, Wahl DB. Phylogeny of the subfamilies of  
839 Ichneumonidae (Hymenoptera). *J Hymenopt Res.* 2019;71:1-156.
- 840 36. Quicke DLJ, Laurenne NM, Fitton MG, Broad GR. A thousand and one wasps: a 28S  
841 rDNA and morphological phylogeny of the Ichneumonidae (Insecta: Hymenoptera) with an  
842 investigation into alignment parameter space and elision. *J Nat Hist.* 2009;43(23-24):1305-421.
- 843 37. Louis F, Bezier A, Periquet G, Ferras C, Drezen JM, Dupuy C. The bracovirus genome  
844 of the parasitoid wasp *Cotesia congregata* is amplified within 13 replication units, including  
845 sequences not packaged in the particles. *J Virol.* 2013;87(17):9649-60.
- 846 38. Lorenzi A, Ravallec M, Eychenne M, Jouan V, Robin S, Darboux I, et al. RNA  
847 interference identifies domesticated viral genes involved in assembly and trafficking of virus-  
848 derived particles in ichneumonid wasps. *Plos Pathogens.* In Press.
- 849 39. Gruber A, Stettler P, Heiniger P, Schumperli D, Lanzrein B. Polydnavirus DNA of the  
850 braconid wasp *Chelonus inanitus* is integrated in the wasp's genome and excised only in later  
851 pupal and adult stages of the female. *J Gen Virol.* 1996;77 ( Pt 11):2873-9.
- 852 40. Opperman R, Emmanuel E, Levy AA. The effect of sequence divergence on  
853 recombination between direct repeats in *Arabidopsis*. *Genetics.* 2004;168(4):2207-15.

- 854 41. Desjardins CA, Gundersen-Rindal DE, Hostetler JB, Tallon LJ, Fuester RW, Schatz  
855 MC, et al. Structure and evolution of a proviral locus of *Glyptapanteles indiensis* bracovirus.  
856 *BMC Microbiol.* 2007;7:61.
- 857 42. Quicke DLJ. *The Braconid and Ichneumonid Parasitoid Wasps: Biology, Systematics,  
858 Evolution and Ecology.* Hoboken, USA: John Wiley & Sons; 2015.
- 859 43. Shaw MR, Horstmann K. An analysis of host range in the *Diadegma nanus* group of  
860 parasitoids in Western Europe, with a key to species. *J Hymenopt Res.* 1997;6:273-96.
- 861 44. Frayssinet M, Audiot P, Cusumano A, Pichon A, Malm LE, Jouan V, et al. Western  
862 European Populations of the Ichneumonid Wasp *Hyposoter didymator* Belong to a Single  
863 Taxon. *Front Ecol Evol.* 2019;7.
- 864 45. Pacheco HM, Vanlaerhoven SL, Garcia MAM, Hunt DW. Food web associations and  
865 effect of trophic resources and environmental factors on parasitoids expanding their host range  
866 into non-native hosts. *Entomol Exp Appl.* 2018;166(4):277-88.
- 867 46. Krell PJ, Summers MD, Vinson SB. Virus with a Multipartite Superhelical DNA  
868 Genome from the Ichneumonid Parasitoid *Campoletis sonorensis*. *J Virol.* 1982;43(3):859-70.
- 869 47. Walker BJ, Abeel T, Shea T, Priest M, Abouelliel A, Sakthikumar S, et al. Pilon: an  
870 integrated tool for comprehensive microbial variant detection and genome assembly  
871 improvement. *PLoS One.* 2014;9(11):e112963.
- 872 48. Smit AFA, Hubley R, Green P. RepeatMasker Open-4.0 2013-2015 [Available from:  
873 <http://www.repeatmasker.org>.
- 874 49. Kent WJ. BLAT--the BLAST-like alignment tool. *Genome Res.* 2002;12(4):656-64.
- 875 50. Simao FA, Waterhouse RM, Ioannidis P, Kriventseva EV, Zdobnov EM. BUSCO:  
876 assessing genome assembly and annotation completeness with single-copy orthologs.  
877 *Bioinformatics.* 2015;31(19):3210-2.
- 878 51. Stanke M, Tzvetkova A, Morgenstern B. AUGUSTUS at EGASP: using EST, protein  
879 and genomic alignments for improved gene prediction in the human genome. *Genome Biol.*  
880 2006;7 Suppl 1:S11 1-8.
- 881 52. Luo R, Liu B, Xie Y, Li Z, Huang W, Yuan J, et al. SOAPdenovo2: an empirically  
882 improved memory-efficient short-read de novo assembler. *Gigascience.* 2012;1(1):18.
- 883 53. Bradnam KR, Fass JN, Alexandrov A, Baranay P, Bechner M, Birol I, et al.  
884 Assemblathon 2: evaluating de novo methods of genome assembly in three vertebrate species.  
885 *Gigascience.* 2013;2(1):10.
- 886 54. Doremus T, Urbach S, Jouan V, Cousserans F, Ravallec M, Demetere E, et al. Venom  
887 gland extract is not required for successful parasitism in the polydnavirus-associated  
888 endoparasitoid *Hyposoter didymator* (Hym. Ichneumonidae) despite the presence of numerous  
889 novel and conserved venom proteins. *Insect Biochem Mol Biol.* 2013;43(3):292-307.
- 890 55. Wu TD, Watanabe CK. GMAP: a genomic mapping and alignment program for mRNA  
891 and EST sequences. *Bioinformatics.* 2005;21(9):1859-75.
- 892 56. Dobin A, Davis CA, Schlesinger F, Drenkow J, Zaleski C, Jha S, et al. STAR: ultrafast  
893 universal RNA-seq aligner. *Bioinformatics.* 2013;29(1):15-21.
- 894 57. Kim D, Pertea G, Trapnell C, Pimentel H, Kelley R, Salzberg SL. TopHat2: accurate  
895 alignment of transcriptomes in the presence of insertions, deletions and gene fusions. *Genome  
896 Biol.* 2013;14(4):R36.
- 897 58. Hoff KJ, Lange S, Lomsadze A, Borodovsky M, Stanke M. BRAKER1: Unsupervised  
898 RNA-Seq-Based Genome Annotation with GeneMark-ET and AUGUSTUS. *Bioinformatics.*  
899 2016;32(5):767-9.
- 900 59. Geib SM, Liang GH, Murphy TD, Sim SB. Whole Genome Sequencing of the Braconid  
901 Parasitoid Wasp *Fopius arisanus*, an Important Biocontrol Agent of Pest Tephritid Fruit Flies.  
902 *G3 (Bethesda).* 2017;7(8):2407-11.



- 903 60. Tvedte E, Walden KK, Mcelroy K, Werren JH, Forbes AA, Hood GR, et al. Genome of  
904 the parasitoid wasp *Diachasma alloeum*, an emerging model for ecological speciation and  
905 transitions to asexual reproduction. *BioRxiv*; 2019.
- 906 61. Werren JH, Richards S, Desjardins CA, Niehuis O, Gadau J, Colbourne JK, et al.  
907 Functional and evolutionary insights from the genomes of three parasitoid *Nasonia* species.  
908 *Science*. 2010;327(5963):343-8.
- 909 62. Pichon A, Bezier A, Urbach S, Aury JM, Jouan V, Ravallec M, et al. Recurrent DNA  
910 virus domestication leading to different parasite virulence strategies. *Sci Adv*.  
911 2015;1(10):e1501150.
- 912 63. Dunn NA, Unni DR, Diesh C, Munoz-Torres M, Harris NL, Yao E, et al. Apollo:  
913 Democratizing genome annotation. *PLoS Comput Biol*. 2019;15(2):e1006790.
- 914 64. Flutre T, Duprat E, Feuillet C, Quesneville H. Considering transposable element  
915 diversification in de novo annotation approaches. *PLoS One*. 2011;6(1):e16526.
- 916 65. Quesneville H, Bergman CM, Andrieu O, Autard D, Nouaud D, Ashburner M, et al.  
917 Combined evidence annotation of transposable elements in genome sequences. *PLoS Comput*  
918 *Biol*. 2005;1(2):166-75.
- 919 66. Sheffield NC, Bock C. LOLA: enrichment analysis for genomic region sets and  
920 regulatory elements in R and Bioconductor. *Bioinformatics*. 2016;32(4):587-9.
- 921 67. Quinlan AR. BEDTools: The Swiss-Army Tool for Genome Feature Analysis. *Curr*  
922 *Protoc Bioinformatics*. 2014;47:11 2 1-34.
- 923 68. Emms DM, Kelly S. OrthoFinder: solving fundamental biases in whole genome  
924 comparisons dramatically improves orthogroup inference accuracy. *Genome Biol*.  
925 2015;16:157.
- 926 69. Drillon G, Carbone A, Fischer G. SynChro: a fast and easy tool to reconstruct and  
927 visualize synteny blocks along eukaryotic chromosomes. *PLoS One*. 2014;9(3):e92621.
- 928 70. Rocher J, Ravallec M, Barry P, Volkoff AN, Ray D, Devauchelle G, et al. Establishment  
929 of cell lines from the wasp *Hyposoter didymator* (Hym., Ichneumonidae) containing the  
930 symbiotic polydnavirus *H didymator* ichnovirus. *Journal of General Virology*. 2004;85:863-8.
- 931 71. Volkoff AN, Cerutti P, Rocher J, Ohresser MCP, Devauchelle G, Duonor-Cerutti M.  
932 Related RNAs in lepidopteran cells after in vitro infection with *Hyposoter didymator* virus  
933 define a new polydnavirus gene family. *Virology*. 1999;263(2):349-63.
- 934 72. Baudet C, Lemaitre C, Dias Z, Gautier C, Tannier E, Sagot MF. Cassis: detection of  
935 genomic rearrangement breakpoints. *Bioinformatics*. 2010;26(15):1897-8.
- 936 73. Lemaitre C, Tannier E, Gautier C, Sagot MF. Precise detection of rearrangement  
937 breakpoints in mammalian chromosomes. *BMC Bioinformatics*. 2008;9:286.
- 938 74. Robin S, Ravallec M, Frayssinet M, Whitfield J, Jouan V, Legeai F, et al. Evidence for  
939 an ichnovirus machinery in parasitoids of coleopteran larvae. *Virus Res*. 2019;263:189-206.

940

## 941 **Table legends**

942 **Table 1.** Summary statistics for *H. didymator* and *C. sonorensis* assembled genomes compared  
943 to other selected parasitoid genomes. Assemblathon2 [53] was used to calculate metrics of  
944 genome assemblies.

946 **Table 2.** Transposable elements (TE) in ichneumonid genomes. Total amount and relative  
947 proportion of LINE, LTR, SINE retrotransposons and DNA transposons in the genomes of  
948 *Hyposoter didymator* and *Campoletis sonorensis*.

949 **Table 3.** Gene annotation statistics for *H. didymator* and *C. sonorensis* assembled genomes.

950 **Table 4.** Summary of the number of viral loci identified in the genomes of *Campoletis*  
951 *sonorensis* (Cs) and *Hyposoter didymator* (Hd), in comparison with data available in NCBI  
952 database. For *H. didymator*, “merge segments” correspond to viral loci that included 2 segments  
953 former deposited in NCBI as distincts, “duplicated segments” those found in two copies in the  
954 wasp genome (see Figure 3 for more details). Number of IV segment loci are presented in the  
955 upper part of the table; number of IVSPERs are given in the lower part of the table. Number of  
956 segments and IVSPER in NCBI corresponds to the sequences deposited in NCBI that were  
957 available before this study.

958 **Table 5.** Comparative gene content of the IV segments in the ichnovirus carried by the  
959 campoplegine wasps *Hyposoter didymator* (HdIV) and *Campoletis sonorensis* (CsIV).

960

## 961 **Figure legends**

962 **Figure 1. Genomic features of *Campoletis sonorensis* and *Hyposoter didymator* genomes.**

963 **A.** BUSCO analysis of parasitoid wasp genomes. BUSCO 3.0.2 analysis with BUSCO Insecta  
964 protein set (1,658 proteins). On the left, BUSCO analysis results using the genomes assemblies;  
965 on the right, BUSCO analysis results using the predicted protein set. X axis starts at 50% for  
966 better visualization. **B. Left panel:** Barplots above each branch of the phylogenetic tree indicate  
967 the number of orthogroups specific to each species or group of species; the color of the bar  
968 indicates the size range of the corresponding orthogroups. **Mid panel:** For each of the  
969 hymenoptera species, are indicated the number of genes (i) specific to the species and present  
970 either as singletons or duplicates; (ii) present in ichneumonids; (iii) present in braconids; (iv)  
971 present in both ichneumonids and braconids; (v) present in all parasitoids and (vi) present in all  
972 hymenoptera. **Right panel:** Matrices (represented as heatmaps) indicating, for each couple of  
973 species, the mean number (#) of genes in synteny blocs (SB), the percentage (%) of genes in  
974 SBs, and the size of the genome (% nucleotides) in SBs. HDID, *Hyposoter didymator*  
975 (ichneumonid); CSON, *Campoletis sonorensis* (ichneumonid); VCAN, *Venturia canescens*  
976 (ichneumonid); MDEM, *Microplitis demolitor* (braconid); FARI, *Fopius arisanus* (braconid);  
977 DALL, *Diachasma alloeum* (braconid).



978 **Figure 2. Distribution of ichnovirus sequences within *Campoletis sonorensis* and**  
979 ***Hyposoter didymator* genomes. A.** Schematic representation of ichnovirus sequences within *C.*  
980 *sonorensis* scaffolds. Segments CsP and CsL, located in short scaffolds, are not shown. **B.**  
981 Schematic representation of ichnovirus sequences within *H. didymator* scaffolds. Segments  
982 Hd45.1 and Hd51, located in short scaffolds, are not shown. See Additional file 3 for more  
983 details.

984 **Figure 3. *Hyposoter didymator* nested and duplicated viral segments. A.** Genomic  
985 architecture of the *H. didymator* ichnovirus (HdIV) segments described as distinct in Dorémus  
986 et al., 2014 but found located in a single wasp genomic locus in the present work. In Dorémus  
987 et al., 2014, segments with overlapping sequence were named Hd(n)a and Hd(n)b; they actually  
988 consist in a single locus here named Hd(n). **B.** Segments duplicated in *H. didymator* genome.  
989 Nucleotide percentage identity between the segment sequences is given on the right part of the  
990 figure. Hd23, Hd44 and Hd45 have two copies (named Hd(n).1 and Hd(n).2) that are either in  
991 the same scaffold but in different insertion sites or in two different scaffold; by contrast, Hd9  
992 corresponds to a single viral loci containing an internal duplication (named “copy 1” and “copy  
993 2” in the diagram).

994 **Figure 4. Dispersion of the viral segments in the wasp genome. A.** Distance (in Kbp)  
995 between viral loci in *H. didymator* and *C. sonorensis* genomes. Data are given between 2  
996 segments, between a segment and an IVSPER, and/or between 2 IVSPERs. **B.** FISH on *H.*  
997 *didymator* chromosomes using BAC genomic clones containing HdIV segments as probes (see  
998 material and methods part). Upper panels show hybridization using the probes containing viral  
999 segments Hd11 (labeled with FITC) and Hd6 (labeled with rhodamine); lower panel the probes  
1000 containing viral segments Hd30 (labeled with FITC) and Hd29 (labeled with rhodamine). Each  
1001 of the probes hybridized with a different *H. didymator* chromosome: Hd11 hybridized with the  
1002 shortest chromosome (#12) whereas Hd6 mapped to a medium-sized chromosome (potentially  
1003 #5); Hd30 hybridized with a large chromosome (#2) and Hd29 with a shorter chromosome  
1004 (#11).

1005 **Figure 5. Segment DRJ variability in terms of number per segment, size and excision sites**  
1006 **in *Hyposoter didymator*. A.** Examples of the different types of DRJ position. **a.** Segment with  
1007 two copies of a single direct repeat (DRJ1L and DRJ1R), each at one end of the segment. **b.**  
1008 Segment with two distinct repeated sequences (DRJ1, in yellow and DRJ2, in green), each  
1009 present in two copies (DRJ1L and DRJ1R, DRJ2L and DRJ2R). **c.** Segment with two repeated  
1010 sequences, each present in two or more copies. DRJ1s in yellow, DRJ2s in green, HdIV genes

1011 represented by arrows. **B.** Schematic representation of the homologous recombination between  
1012 the two DRJs flanking the proviral sequence (DRJL and DRJR) to produce the circular  
1013 molecules (segment) containing one recombined DRJ sequence. The excision sites being  
1014 located at different positions in the DRJ, segments differing in their recombined DRJ sequence  
1015 are generated (isoform 1, 2 or 3 in the diagram). Excision occurs more frequently at some  
1016 positions, resulting in different relative amounts of each isoform (isoform 2 more frequent than  
1017 isoforms 1 and 3 in the diagram). The inset describes the rationale of the algorithm developed  
1018 to identify the “breaking points”. Mapping of the segment sequence (DRJsegment) with the two  
1019 parental DRJs - that differ in their sequences (nucleotide (nt) mismatches) - allows to identify  
1020 the regions where occurred the switch from one parental DRJ to the other (in the diagram, the  
1021 switch occurred between the first and second mismatch). **C.** Prediction of putative  
1022 recombination breaking points in *H. didymator* DRJs. Each graph corresponds to the left copy  
1023 of the DRJ for a given segment. The X axis is the position in the scaffold. The Y axis indicates  
1024 the number of reads (obtained from sequencing of the packaged circular DNA molecules)  
1025 confirming that the circle has been recombined at this position, based on the observed  
1026 mismatches at both end of the segment for each reads.

1027 **Figure 6. Comparative analysis of *Campoletis sonorensis* and *Hyposoter didymator* viral**  
1028 **segments. A.** *C. sonorensis* ichnovirus (CsIV) segment size and gene content, i.e. the number  
1029 of genes of each multigenic family found per segment. **B.** *H. didymator* ichnovirus (HdIV)  
1030 segment size and gene content. For A and B: rep, repeat element genes; repM, repeat element  
1031 genes with multiple repeated elements; vinx, viral innexin; vank, viral ankyrin; cys, cys-motif  
1032 rich protein; PRRP, polar residue rich protein; N, N gene; Gly-Pro, glycine-proline rich protein.  
1033 **C.** Synteny of *H. didymator* genomic regions where viral segments are inserted compared with  
1034 *C. sonorensis* and other parasitoid genomes. **a.** Example of a syntenic region where only *H.*  
1035 *didymator* genome presents a viral segment insertion. *H. didymator* genes from HD005010 to  
1036 HD005030. **b.** The unique case found of a syntenic region where a viral segment in *H.*  
1037 *didymator* and an IVSPER in *C. sonorensis* are inserted in the same position. *H. didymator*  
1038 genes from HD010552 to HD010574. **c.** The unique case found of a syntenic region where a  
1039 viral segment is inserted in both *H. didymator* and *C. sonorensis* genomes, but in two different  
1040 positions. *H. didymator* genes from HD010503 to HD010526. Hd: *Hyposoter didymator*; Cs:  
1041 *Campoletis sonorensis*; Vc: *Venturia canescens* (ichneumonid that has lost the ichnovirus  
1042 ([62]); Md: *Microplitis demolitor* (braconid with a bracovirus); Fa: *Fopius arisanus* (braconid  
1043 with virus-like particles). Numbers following the species name correspond to scaffold number

1044 for Hd, Cs and Vc, NCBI project codes for Md and Fa). Triangles within genomic regions  
1045 correspond to predicted genes; triangles of the same color correspond to orthologs; white  
1046 triangles are singletons or orphan genes. For better visualization, the name of the gene is  
1047 indicated only for some viral (in red for segments, in blue for IVSPERs) genes. See additional  
1048 file 8 for *H. didymator* genes list.

1049 **Figure 7. Comparative analysis of *Campoletis sonorensis* and *Hyposoter didymator***  
1050 **IVSPERs.** **A.** List of IVSPER genes identified in four ichneumonid species. Hd, *Hyposoter*  
1051 *didymator*; Cs, *Campoletis sonorensis*; Gf, *Glypta fumiferanae* (Banchinae) (from Béliveau et  
1052 al., 2015); Ba, *Bathyplectes anurus* (Campopleginae) [74]. For the later, the number of gene  
1053 copies in the genome is not known (presence of a gene copy indicated by an asterisk). **B.**  
1054 Synteny between the IVSPERs identified in *H. didymator* (Hd) and *C. sonorensis* (Cs)  
1055 genomes. *H. didymator* (Hd), where IVSPERs were first described is used as a reference. **C.**  
1056 Synteny of *H. didymator* genomic regions containing IVSPERs compared with *C. sonorensis*  
1057 and other parasitoid genomes. **a.** Synteny for *H. didymator* genomic region containing IVSPER-  
1058 1 and -2 (genes from HD016092 to HD016153); no *C. sonorensis* scaffold corresponded to the  
1059 *H. didymator* IVSPER insertion sites. **b.** Synteny for *H. didymator* genomic region containing  
1060 IVSPER-4 (genes from HD001703 to HD001771); *H. didymator* IVSPER-4 and *C. sonorensis*  
1061 IVSPER-4 are inserted in the same genomic environment. **c.** Synteny for *H. didymator* genomic  
1062 region containing IVSPER-3 and -5 (genes from HD002066 to HD002111); in the region where  
1063 *H. didymator* IVSPER-3 is inserted there is conservation in gene order compared to *C.*  
1064 *sonorensis* but no viral insertion; conversely, *H. didymator* IVSPER-5 and *C. sonorensis*  
1065 IVSPER-5 are inserted in the same genomic environment. Legend as in Figure 6. See additional  
1066 file 8 for *H. didymator* genes list.

1067

1068 **Table of content for Additional files:**

- 1069 1. **Additional File 1 (word file).** Orthogroups analyses.  
1070 2. **Additional File 2 (word file).** Synteny blocks between pairwise comparisons of  
1071 multiple parasitoid genomes.  
1072 3. **Additional File 3 (excell file).** List of scaffolds in *Hyposoter didymator* and *Campoletis*  
1073 *sonorensis* genomes containing at least one ichnovirus sequence.

- 1074 4. **Additional File 4 (excell file)**. List of ichnoviral genes identified in *Hyposoter*  
1075 *didymator* and *Campoletis sonorensis* genome scaffolds containing at least one  
1076 ichnovirus sequence.
- 1077 5. **Additional File 5 (excell file)**. Transposable elements (TE) found in *Hyposoter*  
1078 *didymator* segments, IVSPERs and neighboring regions.
- 1079 6. **Additional File 6 (excell file)**. List of direct repeat junctions (DRJ) found in *Hyposoter*  
1080 *didymator* and *Campoletis sonorensis* genome scaffolds.
- 1081 7. **Additional File 7 (word file)**. DRJs analysis.
- 1082 8. **Additional File 8 (excell file)**. List of the *Hyposoter didymator* genes present in the  
1083 syntenic blocks represented in figures 6 and 7.
- 1084 9. **Additional File 9 (word file)**. Characteristics of the libraries used for genome  
1085 assembly.

1086 **Additional files legends:**

1087 **Additional File 1.** Orthogroups analyses. **A.** Orthofinder clustering metrics. G50: cluster size  
1088 at which 50% of genes are in an orthogroup (OG) of that size or greater. O50: fewest number  
1089 of orthogroups required to reach G50; G50 (assigned genes) = 16; G50 (all genes) = 14; O50  
1090 (assigned genes) = 3063; O50 (all genes) = 4112. **B.** Number of orthogroups shared by each  
1091 species-pair (i.e. the number of orthogroups which contain at least one gene from each of the  
1092 species-pairs). **C.** Number of species-specific orthogroups.

1093 **Additional File 2.** Synteny blocks between pairwise comparisons of multiple parasitoid  
1094 genomes. Synteny blocks were computed using SynChro (Drillon et al., 2014), a tool based on  
1095 a simple algorithm that computes Reciprocal Best-Hits (RBH) to reconstruct the backbones of  
1096 the synteny blocks.

1097 **Additional File 3.** List of scaffolds in *Hyposoter didymator* and *Campoletis sonorensis*  
1098 genomes containing at least on ichnovirus sequence. Are indicated the scaffold name and  
1099 length, the name of the proviral segment or of the Ichnovirus structural protein encoding region  
1100 (IVSPER) found in the scaffold, its length and position in the scaffold, the name of the direct  
1101 repeats flanking the segment or within the segment, and the name of the genes predicted in each  
1102 viral locus. DRJ, direct repeat junction; R, right; L, left; int, internal.

1103 **Additional File 4.** List of ichnoviral genes identified in *Hyposoter didymator* and *Campoletis*  
1104 *sonorensis* genome scaffolds containing at least on ichnovirus sequence. Are indicated the  
1105 scaffold name, the name of the proviral segment or of the Ichnovirus structural protein encoding  
1106 region (IVSPER) found in the scaffold, its length and position in the scaffold, the name of the

1107 gene, its position in the scaffold, if it contains or not an intron, the size of the predicted protein,  
1108 then the NCBI blast P search results (NCBI accession number and ID of the best match, the  
1109 blstP e-value and the percentage of identities).

1110 **Additional File 5.** Transposable elements (TE) found in *Hyposter didymator* segments,  
1111 IVSPERs and neighboring regions. The LOLA package (Sheffield and Bock, 2016) was used  
1112 to assess if some particular TE were enriched close to viral circles or IVSPER. Genomics  
1113 positions were enlarged to 10 kbp at each segments ends and sampled against 1,000 other  
1114 similar regions from the genome, then used it a random reference. LOLA identifies overlaps  
1115 and calculates enrichment for each TE. For each pairwise comparison, a series of columns  
1116 describe the results of the statistical test (pvalueLog:  $-\log_{10}(\text{pvalue})$  from the fisher's exact  
1117 result; oddsRatio: result from the fisher's exact test; q-value transformation to provide false  
1118 discovery rate (FDR) scores automatically). Some TE are enriched around viral locations, but  
1119 after FDR correction, nothing was significant.

1120 **Additional File 6.** List of direct repeat junctions (DRJ) found at the ends or within proviral  
1121 segments genes identified in *Hyposoter didymator* and *Campoletis sonorensis* genome  
1122 scaffolds. Are indicated the scaffold name, the name of the proviral segment, its length and  
1123 position in the scaffold, the name of the DRJ, its length and position in the scaffold and the DRJ  
1124 sequence. Nucleotide identities are indicated for each pair of DRJ.

1125 **Additional File 7.** DRJs analysis. **A.** DNA motifs found in the direct repeated sequences  
1126 flanking the IV segments inserted in wasp genomes. Analysis was performed using the  
1127 DNAMINDA2 webserver (<http://bmb1.sdstate.edu/DMINDA2/annotate.php>); the input dataset  
1128 was composed of 99 DRJ sequences (right junctions of HdIV and CsIV segments). A total of  
1129 89 motifs were obtained; only those whose occurrence exceed 70% of the DRJs are reported.

1130 **B.** Occurrence rate of motifs predicted with DMINDA 2.0 webserver in DRJs and whole  
1131 genome sequences. Each of the two motifs was search among the 6 bp kmers present in the  
1132 whole genome (201,969,604) and in the DRJs (33,930). The significance was evaluated using  
1133 a Chi2 (taking into account the ratio of these motifs / all the other motifs in the DRJS and in the  
1134 genome). **C.** Alignments of Sanger-sequenced DRJ regions from integrated and circular forms  
1135 of seven *H. didymator* IV segments containing a putative excision site.

1136 **Additional File 8.** List of the *Hyposoter didymator* genes present in the syntenic blocks  
1137 represented in figures 6 and 7. Are indicated the *H. didymator* gene ID, its position in the  
1138 scaffold, the number of the orthogroup to which it belongs and the result of the best match  
1139 obtained following Blast similarity search. For each *H. didymator* gene, the corresponding

1140 *Campoletis sonorensis* gene ID, orthogroup number and position in *C. sonorensis* scaffold are  
1141 indicated.  
1142 **Additional File 9.** Characteristics of the libraries used for genome assembly. **A.** *Campoletis*  
1143 *sonorensis*. **B.** *Hyposoter didymator*.



**Table 1.** Summary statistics for *H. didymator* and *C. sonorensis* assembled genomes and for other selected parasitoid genomes.

|                           | <i>Hyposoter didymator</i> | <i>Campoletis sonorensis</i> | <i>Venturia canescens</i>        | <i>Microplitis demolitor</i>    | <i>Fopius arisanus</i>         | <i>Diachasma alboeum</i>         | <i>Nasonia vitripennis</i>       |
|---------------------------|----------------------------|------------------------------|----------------------------------|---------------------------------|--------------------------------|----------------------------------|----------------------------------|
| Number of scaffolds       | 2,591                      | 11,756                       | 62,001                           | 1,794                           | 1,042                          | 3,968                            | 6,098                            |
| Total length (Mbp)        | 198.7                      | 258.9                        | 237.8                            | 241.2                           | 153.6                          | 388.8                            | 295.8                            |
| Longest scaffold (Mbp)    | 15.7                       | 6.1                          | 0.85                             | 7.15                            | 5.5                            | 6.61                             | 33.57                            |
| Scaffold N50 (Mbp)        | 4.00                       | 0.73                         | 0.114                            | 1.14                            | 0.98                           | 0.65                             | 0.90                             |
| Median scaffold size (nt) | 1,941                      | 3,200                        | 233                              | 2,621                           | 12,305                         | 4,372                            | 2,037                            |
| Contig N50 (bp)           | 151,312                    | 315,222                      | 15,077                           | 14,499                          | 59,408                         | 50,453                           | 18,840                           |
| %N                        | 1.35%                      | 0.40%                        | 1.70%                            | 14.65%                          | 8.24%                          | 6.16%                            | 19.33%                           |
| GC (%)                    | 39.5%                      | 37.2%                        | 39.33%                           | 25.99%                          | 35.42%                         | 36.09%                           | 33.65%                           |
| Reference                 | /                          | /                            | Pichon <i>et al.</i> , 2015 [62] | Burke <i>et al.</i> , 2018 [27] | Geib <i>et al.</i> , 2017 [59] | Tvedte <i>et al.</i> , 2019 [60] | Werren <i>et al.</i> , 2010 [61] |

**Table 2.** Transposable elements (TE) in the genomes of *Hyposoter didymator* and *Campoletis sonorensis*.

| TE classes    | <i>Hyposoter didymator</i> |                          | <i>Campoletis sonorensis</i> |                          |
|---------------|----------------------------|--------------------------|------------------------------|--------------------------|
|               | Number                     | Percentage of TE classes | Number                       | Percentage of TE classes |
| <b>LINE</b>   | 98                         | 10%                      | 189                          | 20%                      |
| <b>LTR</b>    | 106                        | 11%                      | 193                          | 20%                      |
| <b>SINE</b>   | 33                         | 3%                       | 56                           | 6%                       |
| <b>DNA</b>    | 299                        | 30%                      | 314                          | 33%                      |
| <b>Others</b> | 464                        | 46%                      | 199                          | 21%                      |
| <b>Total</b>  | 1000                       | /                        | 951                          | /                        |

**Table 3.** Gene annotation statistics for *Hyposoter didymator* and *Campoletis sonorensis* assembled genomes.

|                             | <i>Hyposoter didymator</i> | <i>Campoletis sonorensis</i> |
|-----------------------------|----------------------------|------------------------------|
| Transcript number           | 18,119                     | 21,915                       |
| Total transcript size (nt)  | 95,868,518                 | 68,669,265                   |
| Mean transcript size (nt)   | 5,291                      | 3,133                        |
| Median transcript size (nt) | 2,428                      | 1,934                        |
| Total exon number           | 98,639                     | 93,590                       |
| Mean exon number            | 5.4                        | 4.3                          |
| Median exon number          | 4                          | 3                            |
| Total exon size (nt)        | 28,900,964                 | 27,144,418                   |
| Mean exon size (nt)         | 292                        | 290                          |
| Median exon size (nt)       | 186                        | 192                          |
| Total intron size (nt)      | 66,540,946                 | 41,453,172                   |
| Mean intron size (nt)       | 826                        | 578                          |
| Median intron size (nt)     | 245                        | 296                          |
| Total CDS size (nt)         | 28,900,964                 | 27,144,418                   |
| Mean CDS size (nt)          | 1,595                      | 1,239                        |
| Median CDS size (nt)        | 1,090                      | 806                          |

**Table 4.** Summary of the number of viral loci identified in the genomes of *Campoletis sonorensis* (Cs) and *Hyposoter didymator* (Hd), in comparison with data available in NCBI database.

|                                                   | <b>Cs</b>        | <b>Hd</b>                                |
|---------------------------------------------------|------------------|------------------------------------------|
| <b>Number of segments in NCBI</b>                 | 25               | 50                                       |
| <b>Number of segments in genome</b>               | 31               | 54                                       |
| <b>NCBI segments not found in genome</b>          | 2 (CsA2, CsK)    | 0                                        |
| <b>Merged segments (compared to NCBI)</b>         | 0                | 6 (Hd2, Hd11, Hd17, Hd20, Hd26, Hd31-34) |
| <b>Duplicated segments (compared to NCBI)</b>     | 0                | 3 (Hd23, Hd44, Hd45)                     |
| <b>Newly identified segments</b>                  | 8 (CsX1 to CsX8) | 6 (Hd46 to Hd51)                         |
| <b>"Isolated" segment genes (short scaffolds)</b> | 2                | 1                                        |
| <b>Total number of segment loci in genome</b>     | <b>33</b>        | <b>55</b>                                |
| <b>Number of IVSPERs in NCBI</b>                  | 0                | 3                                        |
| <b>Number of IVSPERs in genome</b>                | 5                | 5                                        |
| <b>NCBI IVSPERs not found in genome</b>           | na               | 0                                        |
| <b>Newly identified IVSPERs</b>                   | 5                | 2                                        |
| <b>"Isolated" IVSPER genes</b>                    | 2                | 1                                        |
| <b>Total number of IVSPER loci in genome</b>      | <b>7</b>         | <b>6</b>                                 |

**Table 5.** Comparative gene content of the IV segments from the campoplegine wasps *Hyposoter didymator* (HdIV) and *Campoletis sonorensis* (CsIV).

| <b>IV Gene family</b>                | <b>HdIV</b> | <b>CsIV</b> |
|--------------------------------------|-------------|-------------|
| <i>repeat element genes</i>          | 38          | 51          |
| <i>viral innexins</i>                | 17          | 6           |
| <i>viral ankyrins</i>                | 10          | 16          |
| <i>cys-motif proteins</i>            | 9           | 13          |
| <i>polar-residue-rich proteins</i>   | 5           | nd          |
| <i>N-genes</i>                       | 3           | 3           |
| <b>Total</b>                         | <b>82</b>   | <b>88</b>   |
| <b>HdIV gene family</b>              |             |             |
| <i>glycine-proline rich proteins</i> | 3           | /           |
| <i>Hypothetical Protein (HP)</i>     | 19          | /           |
| <b>Total</b>                         | <b>22</b>   | <b>/</b>    |
| <b>HdIV single gene</b>              |             |             |
| <i>K19</i> (GenBank: AF241775.1)     | 1           | /           |
| <i>P30</i> (GenBank: KJ586328.1)     | 1           | /           |
| <i>Serine-threonine rich protein</i> | 1           | /           |
| <i>Undetermined (U)</i>              | 45          | /           |
| <b>CsIV single gene</b>              |             |             |
| <i>Hypothetical Protein (HP)</i>     | /           | 22          |
| <b>TOTAL</b>                         | <b>152</b>  | <b>111</b>  |

A

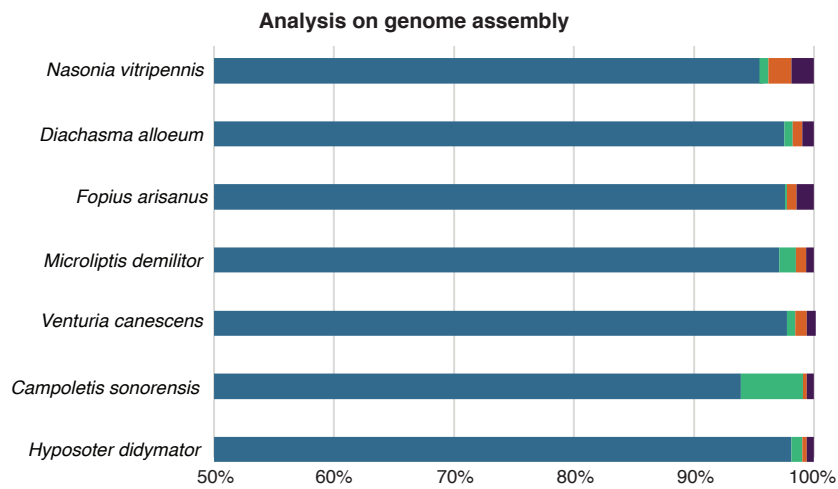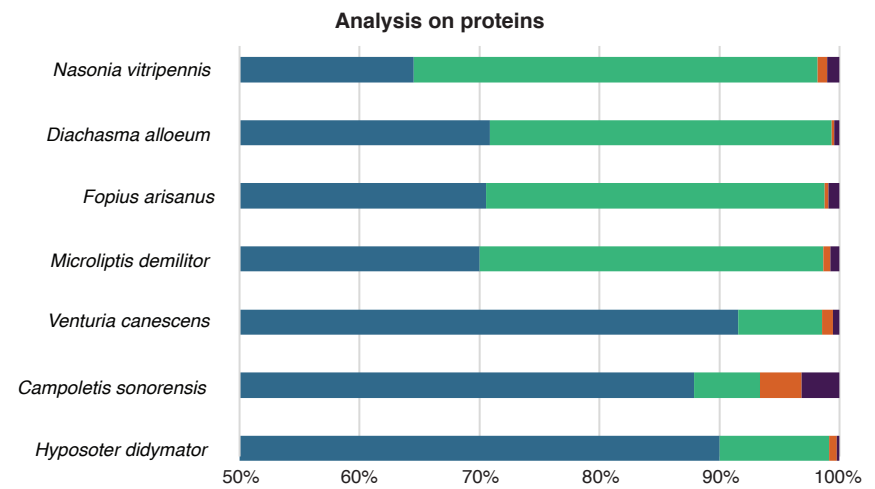

■ Complete and single-copy BUSCOs    ■ Complete and duplicated BUSCOs  
■ Fragmented BUSCOs    ■ Missing BUSCOs

B

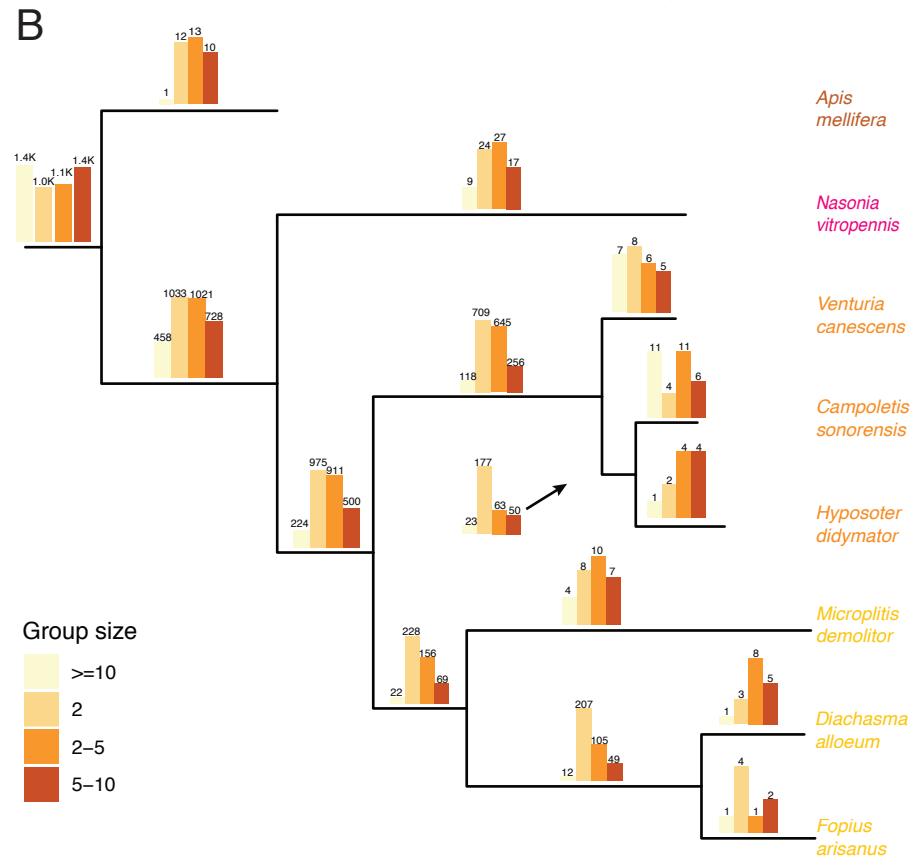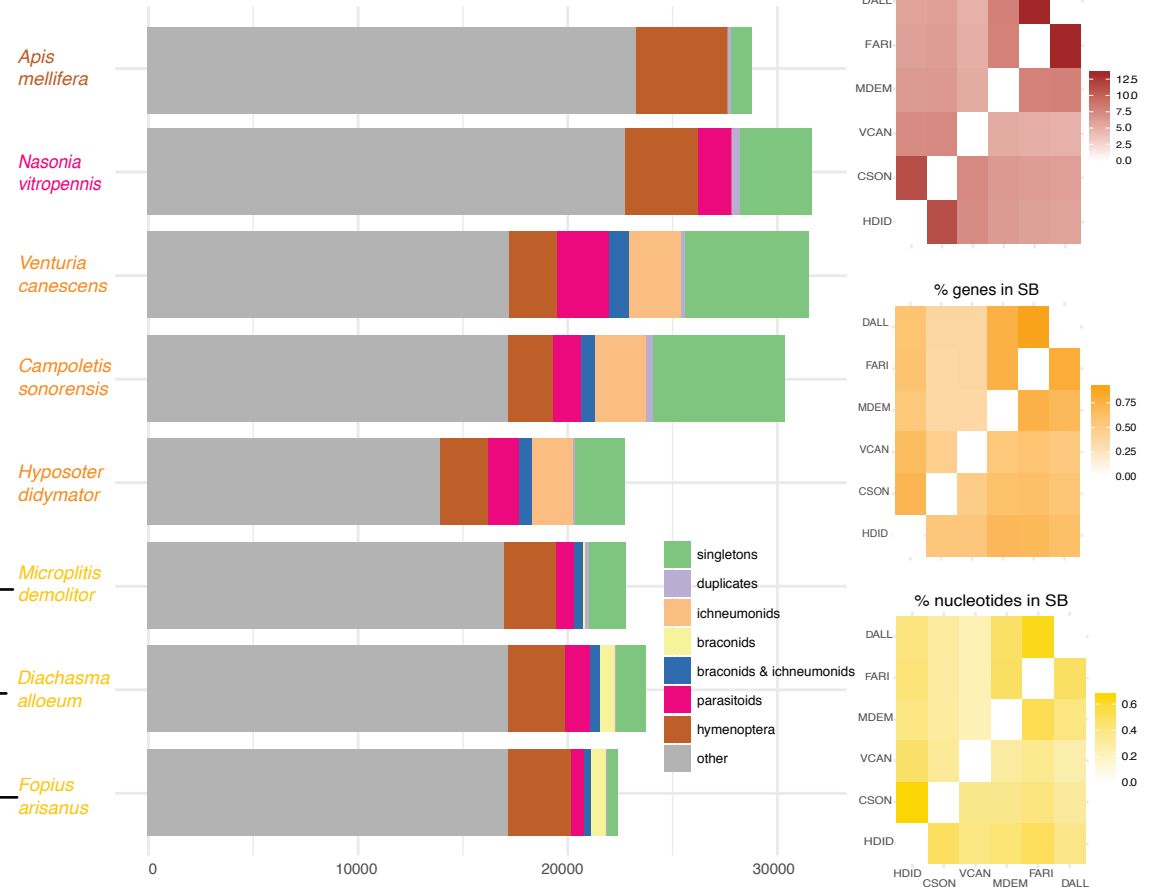



**A: *Campoletis sonorensis***

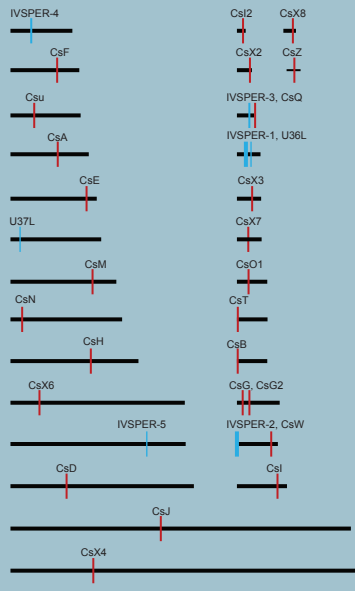

1 Mbp

**B: *Hyposoter didymator***

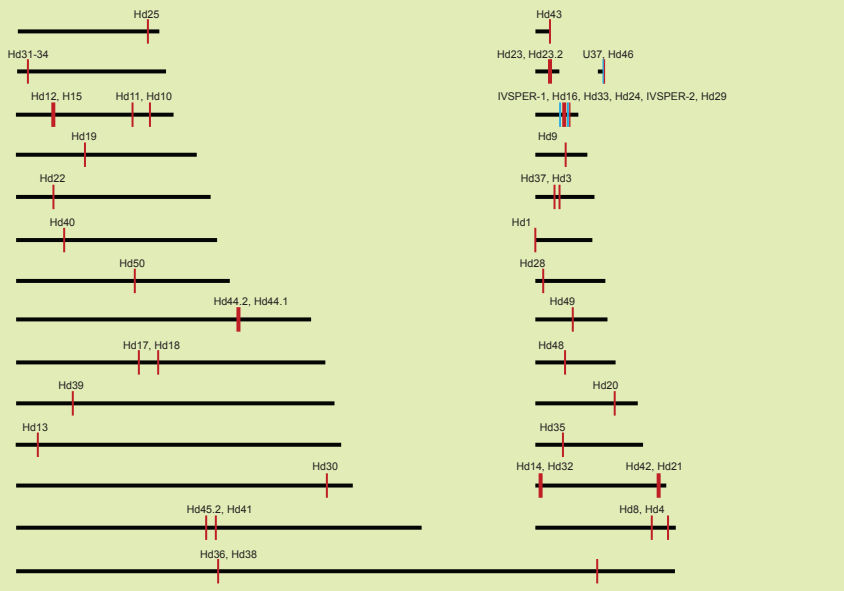

1 Mbp

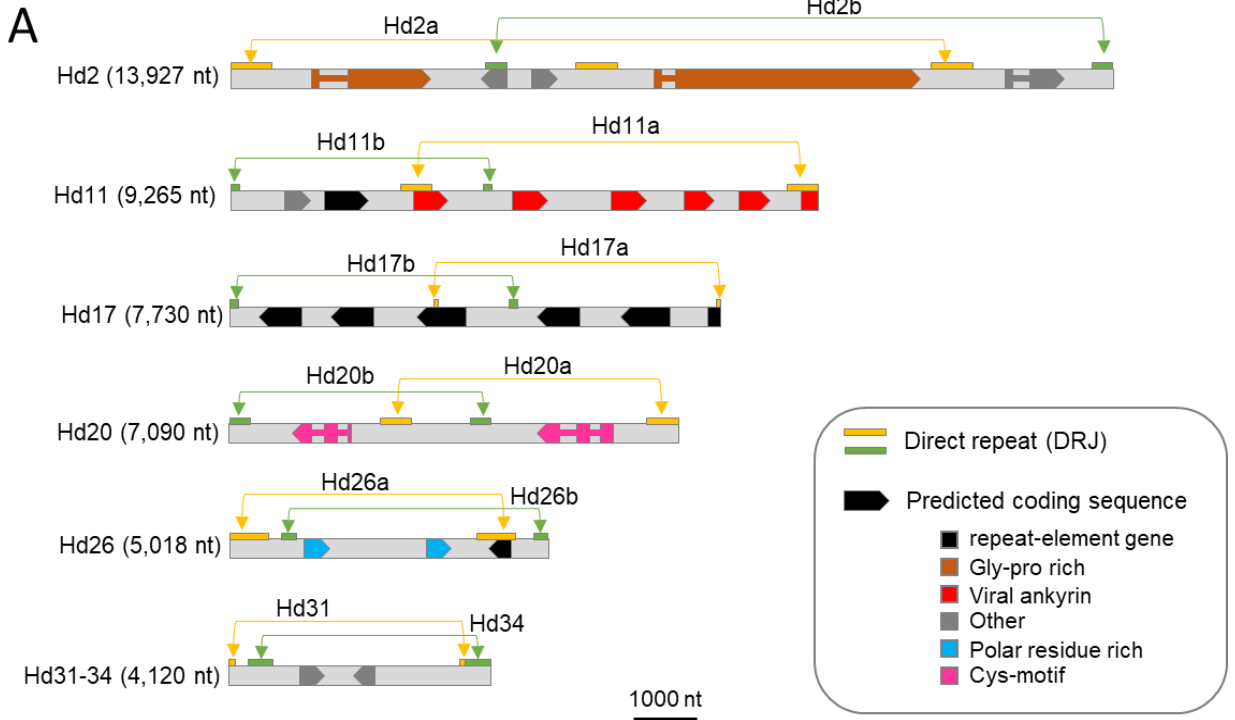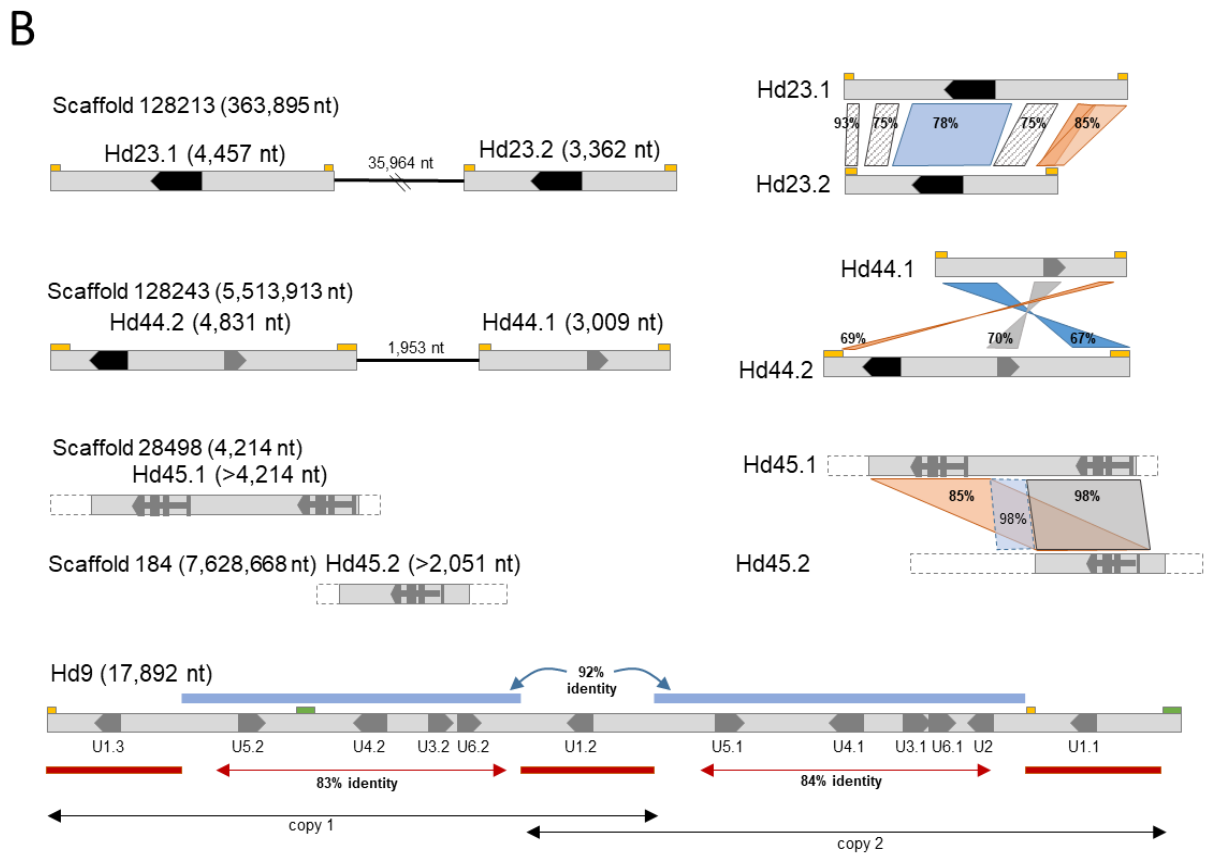



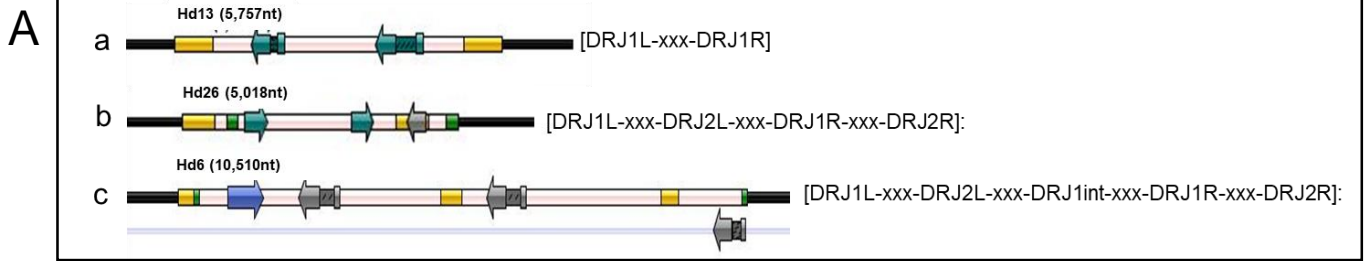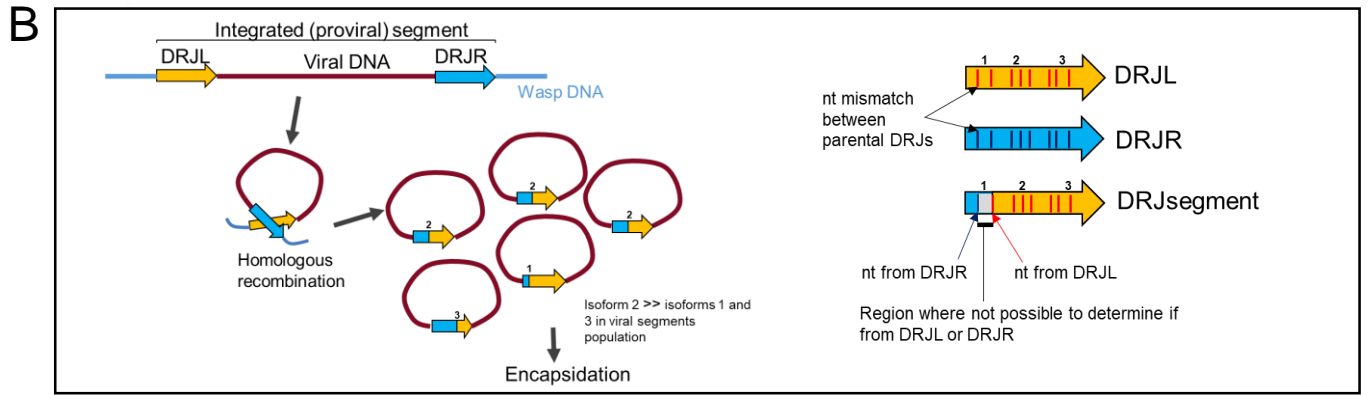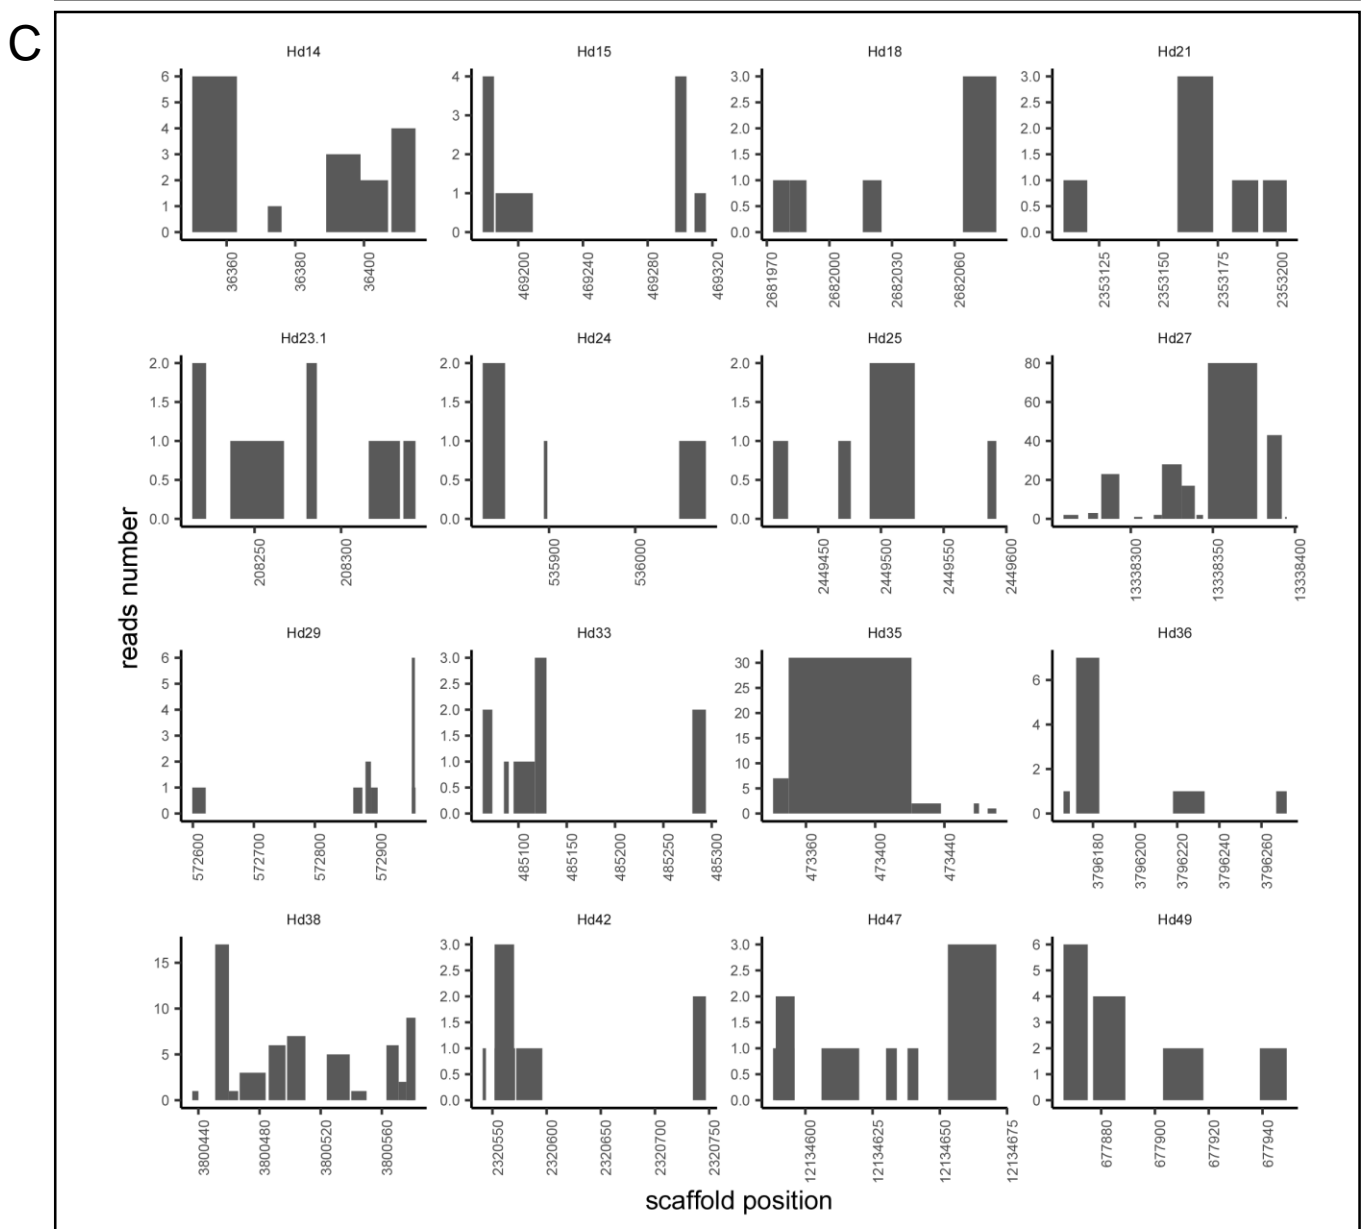

**A**

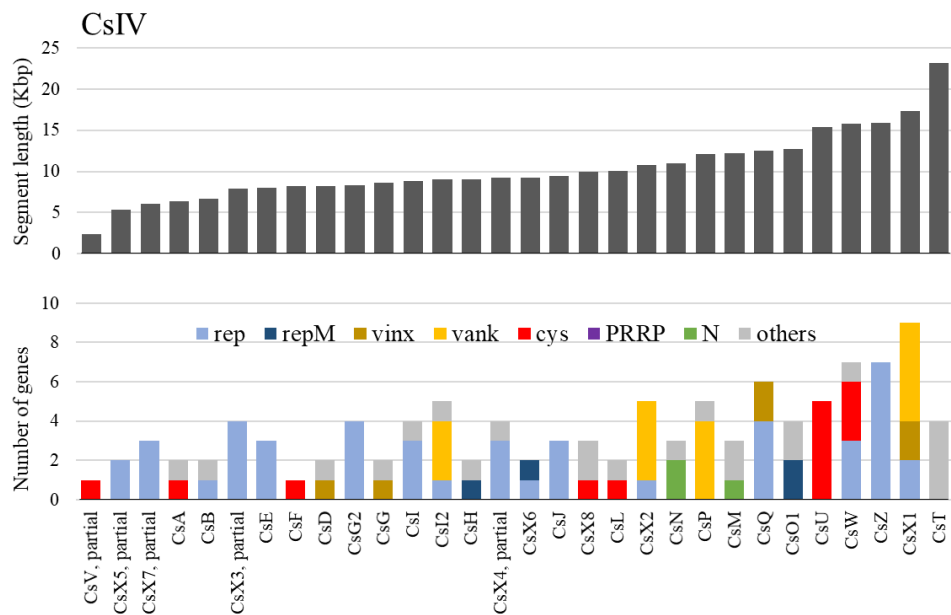

**B**

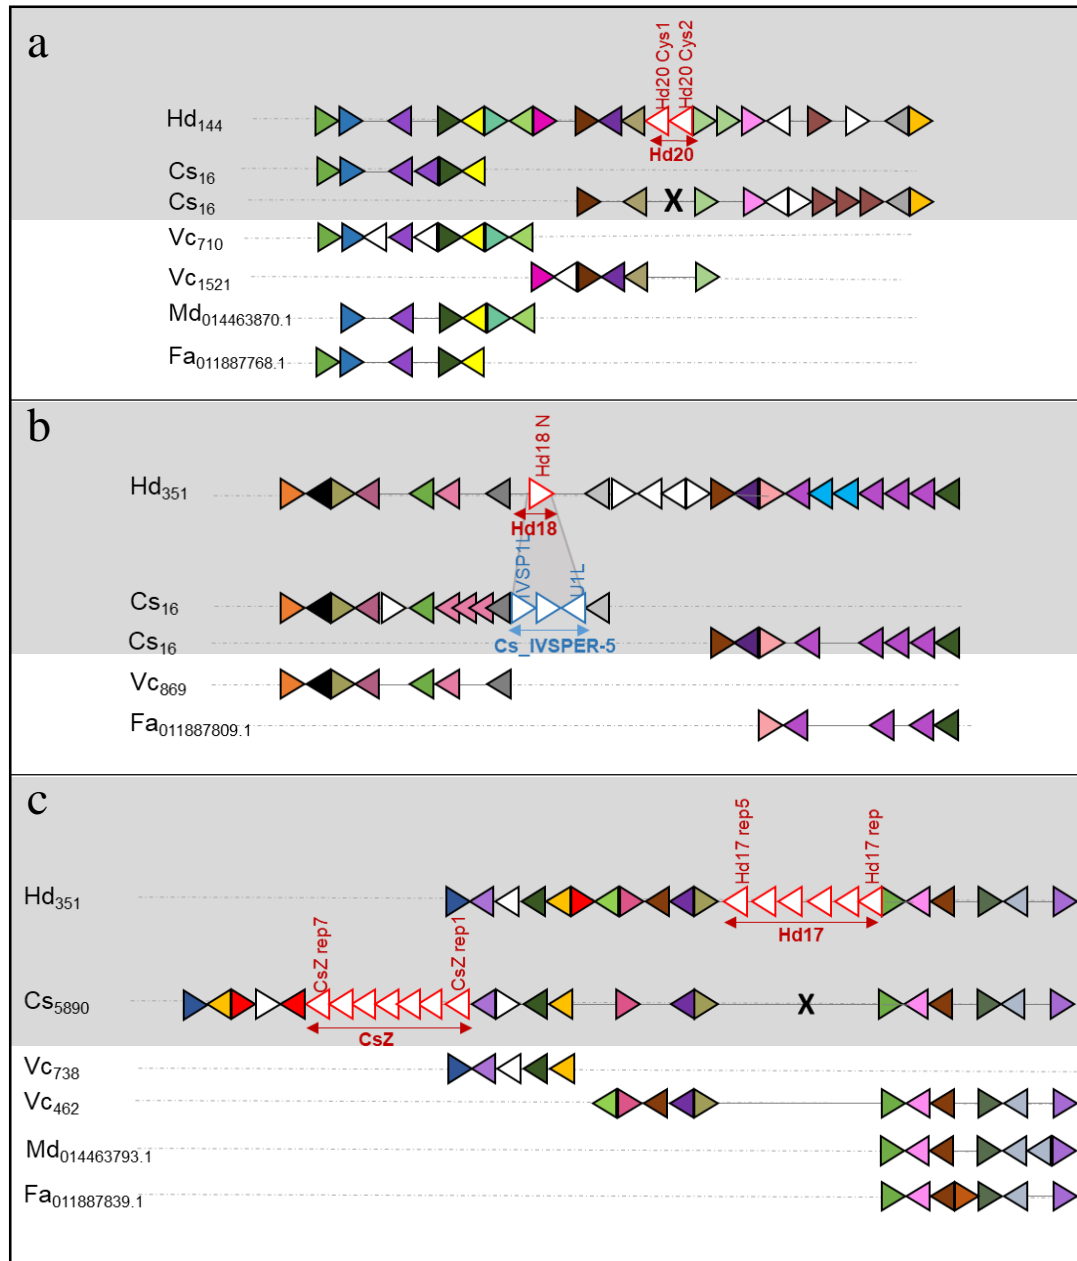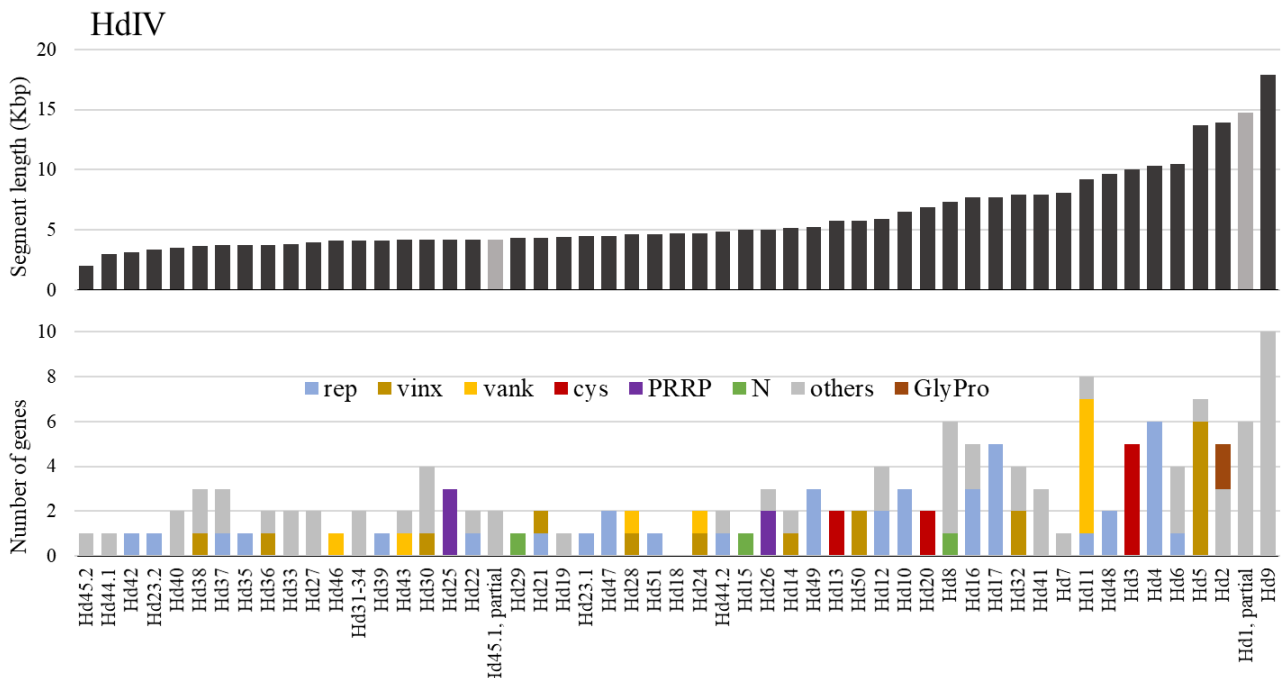

A

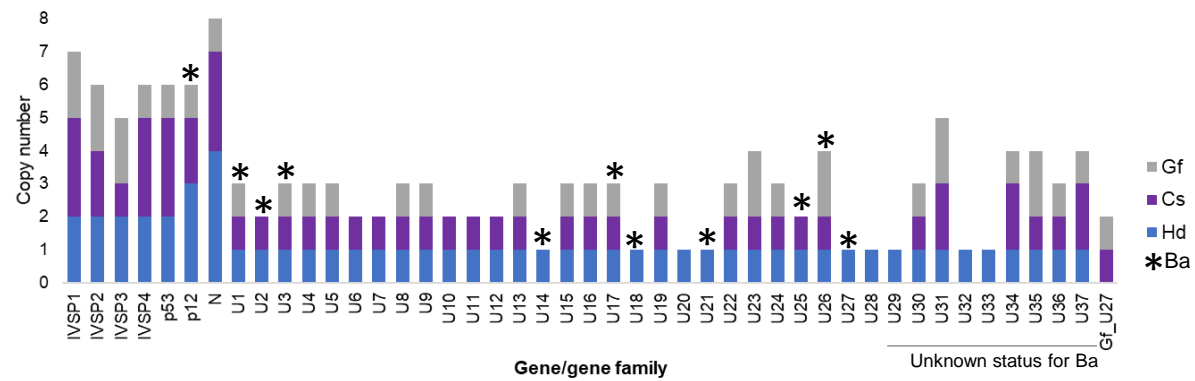

B

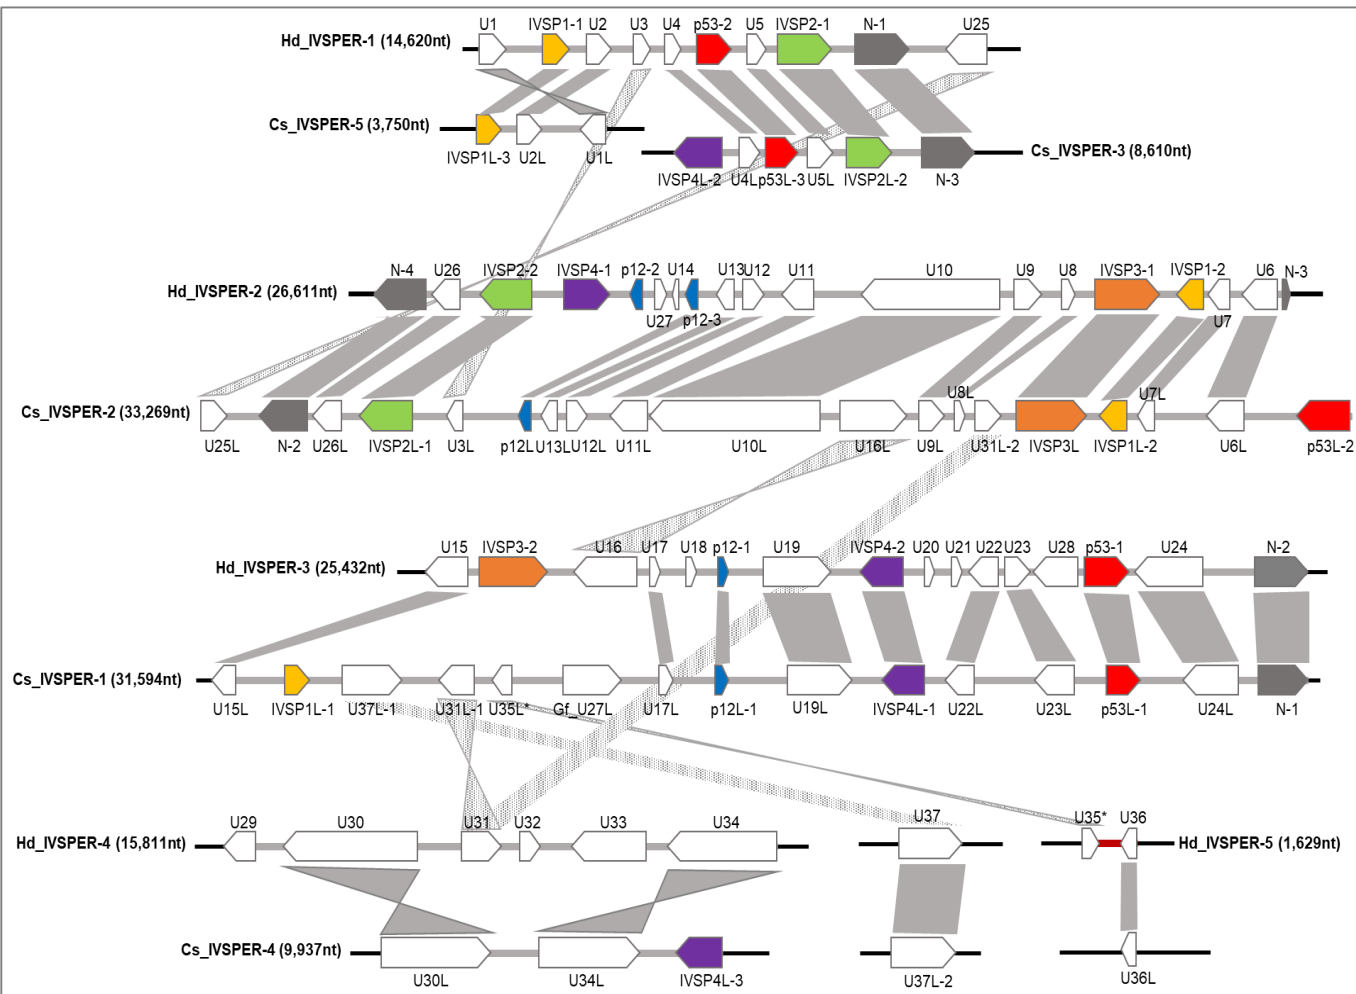



**C**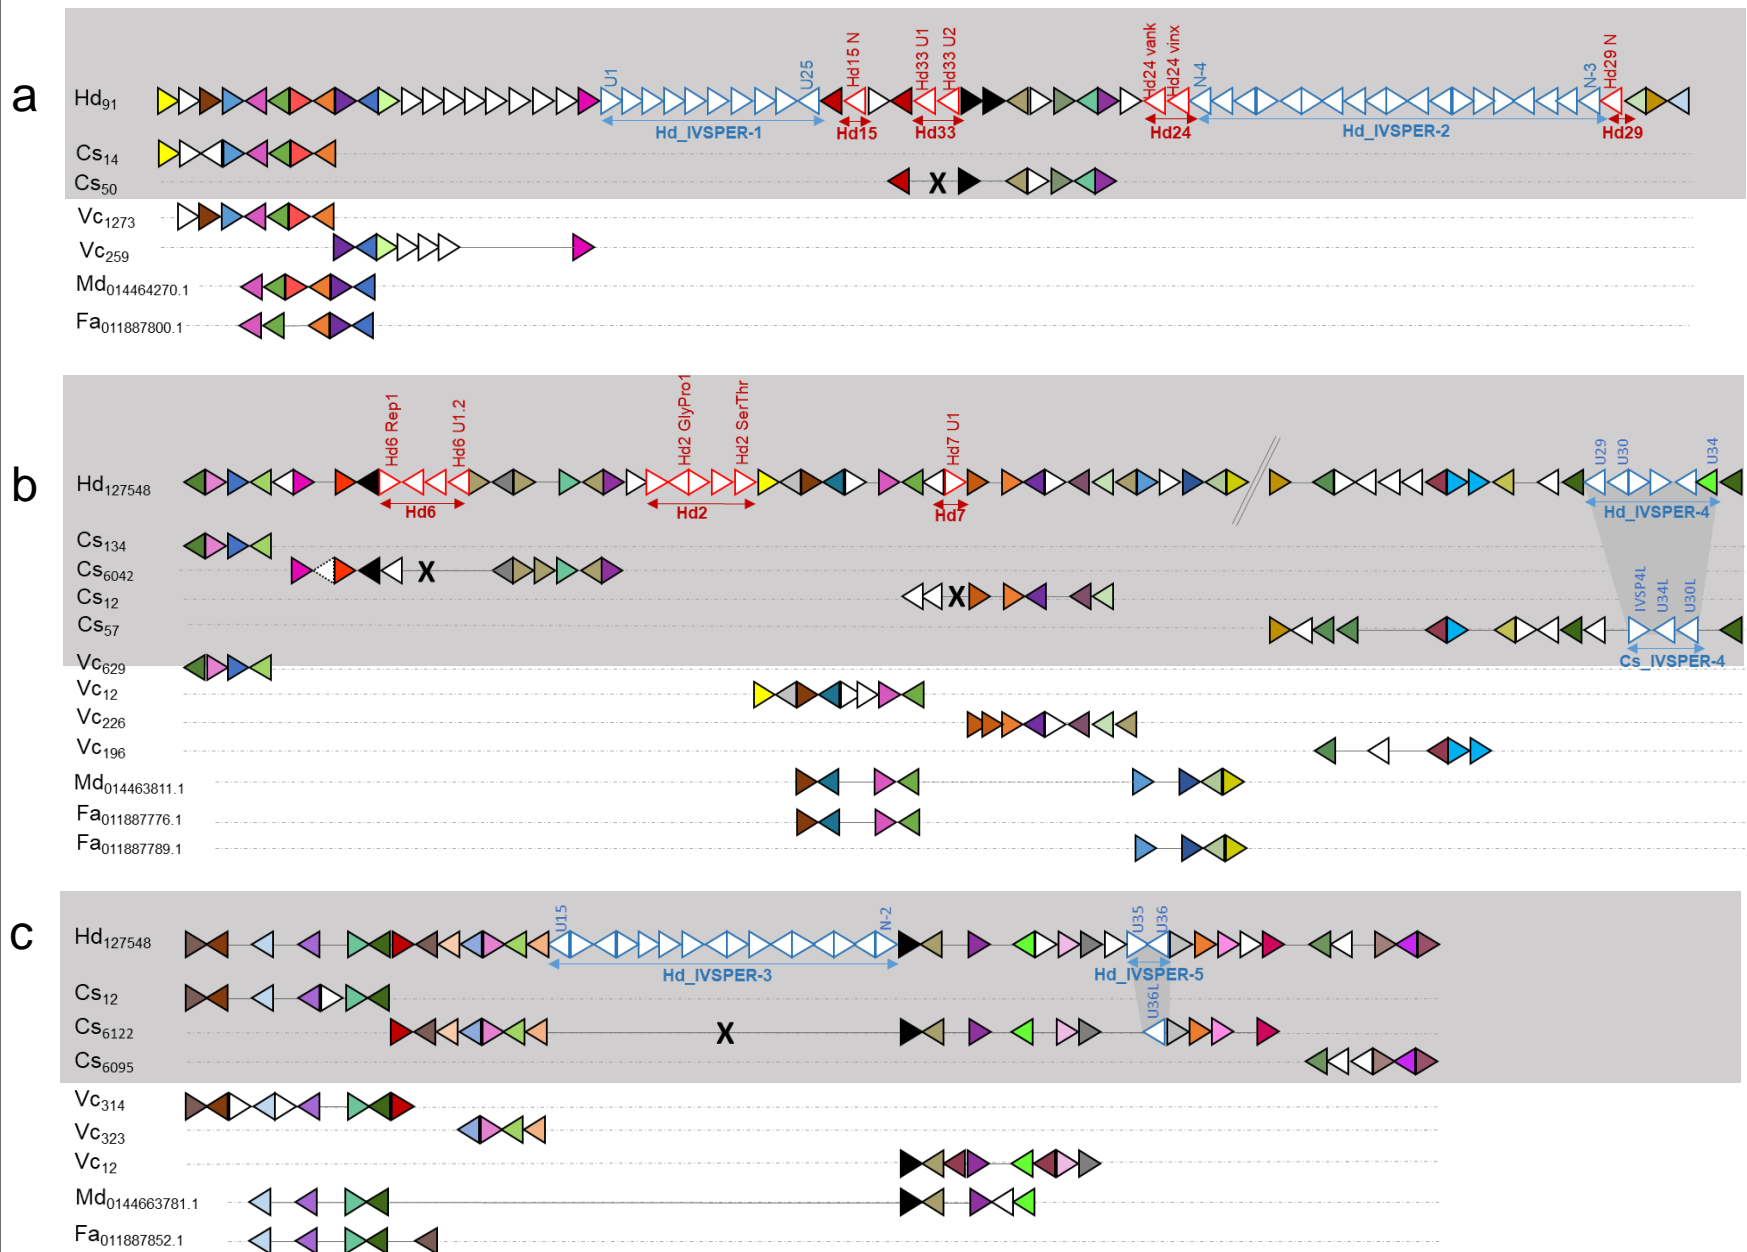

Source: https://www.biorxiv.org/content/10.1101/861310v1.full.pdf
