# Supplementary material for: Conserved and specific genomic features of endogenous polydnaviruses revealed by whole genome sequencing of two ichneumonid wasps
Source: bioRxiv or medRxiv preprint supplement (doi:10.1101/861310), 2019-12-02
Supplement: Supplementary file [file media-1.pdf]

C. Number of species-specific orthogroups.

|                                                              | <b>Nb species-specific orthogroups</b> |
|--------------------------------------------------------------|----------------------------------------|
| <i>Hyposoter didymator</i> (Hd)                              | 11                                     |
| <i>Campoletis sonorensis</i> (Cs)                            | 32                                     |
| <i>Venturia canescens</i> (Vc)                               | 26                                     |
| <b>IV carrying Ichneumonids (Hd, Cs)</b>                     | 313                                    |
| <b>Ichneumonids (Hd, Cs, Vc)</b>                             | 1,728                                  |
| <b>Ichneumonids &amp; Braconids (Hd, Cs, Vc, Md, Fa, Da)</b> | 2,610                                  |
| <b>Parasitic wasps</b>                                       | 3,240                                  |
| <b>Hymenoptera</b>                                           | 5,158                                  |
| <b>Hymenoptera + diptera</b>                                 | 12,825                                 |
