# Supplementary material for: Conserved and specific genomic features of endogenous polydnaviruses revealed by whole genome sequencing of two ichneumonid wasps
Source: bioRxiv or medRxiv preprint supplement (doi:10.1101/861310), 2019-12-02
Supplement: Supplementary file [file media-2.pdf]

**Additional File 2. Synteny blocks between pairwise comparisons of multiple parasitoid genomes**

Synteny blocks were computed using SynChro (Drillon et al., 2014; doi: 10.1371/journal.pone.0092621), a tool based on a simple algorithm that computes Reciprocal Best-Hits (RBH) to reconstruct the backbones of the synteny blocks.

| species 1                           | species 2                         | # genes in Species 1 | # genes in Species 2 | RBH          | mean % similarity of RBH genes | # synteny blocks (SB) | mean number of genes in SB | Species 1 nucleotides in SB | Species 2 nucleotides in SB | # Species 1 genes in SB | # Species 2 genes in SB |
|-------------------------------------|-----------------------------------|----------------------|----------------------|--------------|--------------------------------|-----------------------|----------------------------|-----------------------------|-----------------------------|-------------------------|-------------------------|
| <b><i>Campoletis sonorensis</i></b> | <b><i>Hyposoter didymator</i></b> | <b>21,987</b>        | <b>18,154</b>        | <b>9,201</b> | <b>82.2258</b>                 | <b>1,112</b>          | <b>11.2334</b>             | <b>130,986,569</b>          | <b>136,689,043</b>          | <b>11,816</b>           | <b>12,828</b>           |
| <i>Campoletis sonorensis</i>        | <i>Diachasma alloeum</i>          | 21,987               | 19,692               | 7,054        | 72.4531                        | 1,581                 | 6.1151                     | 79,457,000                  | 121,585,809                 | 8,101                   | 11,023                  |
| <i>Campoletis sonorensis</i>        | <i>Fopius arisanus</i>            | 21,987               | 18,906               | 6,963        | 71.7424                        | 1,583                 | 6.2612                     | 78,144,432                  | 64,120,970                  | 7,957                   | 11,583                  |
| <i>Campoletis sonorensis</i>        | <i>Microplitis demolitor</i>      | 21,987               | 18,586               | 6,889        | 71.3963                        | 1,503                 | 6.4112                     | 79,951,790                  | 87,227,954                  | 8,066                   | 10,937                  |
| <i>Campoletis sonorensis</i>        | <i>Venturia canescens</i>         | 21,987               | 23,401               | 9,602        | 81.9265                        | 1,501                 | 7.3997                     | 84,998,388                  | 87,756,926                  | 10,31                   | 11,589                  |
| <i>Diachasma alloeum</i>            | <i>Fopius arisanus</i>            | 19,692               | 18,906               | 10,85        | 84.4038                        | 1,244                 | 13.2826                    | 188,094,018                 | 98,011,380                  | 15,707                  | 17,083                  |
| <i>Diachasma alloeum</i>            | <i>Hyposoter didymator</i>        | 19,692               | 18,154               | 8,784        | 71.9646                        | 1,949                 | 5.8489                     | 147,155,684                 | 85,519,660                  | 12,100                  | 10,426                  |
| <i>Diachasma alloeum</i>            | <i>Microplitis demolitor</i>      | 19,692               | 18,586               | 9,227        | 75.5011                        | 1,723                 | 8.1993                     | 156,017,415                 | 115,880,628                 | 13,263                  | 13,987                  |
| <i>Diachasma alloeum</i>            | <i>Venturia canescens</i>         | 19,692               | 23,401               | 8,435        | 71.8280                        | 1,960                 | 4.8980                     | 101,537,848                 | 57,440,014                  | 10,261                  | 8,663                   |
| <i>Fopius arisanus</i>              | <i>Hyposoter didymator</i>        | 18,906               | 18,154               | 8,622        | 71.5998                        | 2,004                 | 5.9214                     | 78,694,026                  | 88,834,572                  | 12,881                  | 10,551                  |
| <i>Fopius arisanus</i>              | <i>Microplitis demolitor</i>      | 18,906               | 18,586               | 9,151        | 74.8577                        | 1,798                 | 7.8715                     | 82,643,504                  | 117,622,728                 | 14,057                  | 13,906                  |
| <i>Fopius arisanus</i>              | <i>Venturia canescens</i>         | 18,906               | 23,401               | 8,203        | 71.5408                        | 1,957                 | 5.0424                     | 53,941,273                  | 57,217,953                  | 10,812                  | 8,631                   |
| <i>Hyposoter didymator</i>          | <i>Microplitis demolitor</i>      | 18,154               | 18,586               | 8,513        | 72.4243                        | 1,844                 | 6.2796                     | 82,632,725                  | 106,502,067                 | 10,063                  | 12,767                  |
| <i>Hyposoter didymator</i>          | <i>Venturia canescens</i>         | 18,154               | 23,401               | 11,21        | 82.4090                        | 1,695                 | 7.2375                     | 96,760,707                  | 94,022,094                  | 11,769                  | 12,407                  |
| <i>Microplitis demolitor</i>        | <i>Venturia canescens</i>         | 18,586               | 23,401               | 8,163        | 70.9083                        | 1,848                 | 5.1366                     | 72,847,449                  | 56,076,459                  | 10,217                  | 8,494                   |
