# Supplementary material for: Conserved and specific genomic features of endogenous polydnaviruses revealed by whole genome sequencing of two ichneumonid wasps
Source: bioRxiv or medRxiv preprint supplement (doi:10.1101/861310), 2019-12-02
Supplement: Supplementary file [file media-4.pdf]

| Scaffold                     | Proviral segment /IVSPER | Proviral/IVS PER sequence size (nt) | Proviral/IVSPER position in scaffold | Gene name          | Gene position in scaffold  | Introns in gene (yes/no) | Predicted protein size (aa) | NCBI accession | protein ID                                                    | Length (nt) | BlastP e-value | Identities (%) | Comments                                                                     |
|------------------------------|--------------------------|-------------------------------------|--------------------------------------|--------------------|----------------------------|--------------------------|-----------------------------|----------------|---------------------------------------------------------------|-------------|----------------|----------------|------------------------------------------------------------------------------|
| <b>Hyposoter didymator</b>   |                          |                                     |                                      |                    |                            |                          |                             |                |                                                               |             |                |                |                                                                              |
| <b>HdIV proviral segment</b> |                          |                                     |                                      |                    |                            |                          |                             |                |                                                               |             |                |                |                                                                              |
| scaffold49647                | similar to Hd2           | 1537                                | 1-1537 (partial)                     | Gly-Pro_P40-like_1 | 1-1235 - strand            | yes                      | 315                         | AAD40678.1     | P40 protein [Hyposoter didymator ichnovirus]                  | 397         | 2.00E-168      | 282/318(89%)   |                                                                              |
| scaffold184                  | Hd45.2                   | 2051                                | 3564791-3566841                      | U1_Hd45.2          | 3565610-3566474 - strand   | yes                      | 135                         | AIK25614.1     | D8 [Hyposoter didymator ichnovirus]                           | 138         | 4.00E-34       | 82/140(59%)    |                                                                              |
| scaffold128243               | Hd44.1                   | 3009                                | 4203985-4206993                      | U1_Hd44.1          | 4205686-4205997 + strand   | no                       | 104                         | AIK25616.1     | U2 [Hyposoter didymator ichnovirus]                           | 104         | 1.00E-65       | 101/104(97%)   |                                                                              |
| scaffold64                   | Hd42                     | 3157                                | 2320523-2323679                      | Rep1_Hd42          | 2322099-2322881 - strand   | no                       | 261                         | AIK25619.1     | Rep1 [Hyposoter didymator ichnovirus]                         | 261         | 0.00E+00       | 248/261(95%)   |                                                                              |
| scaffold128213               | Hd23.2                   | 3362                                | 248624-251985                        | Rep1_Hd23.2        | 249754-250470 - strand     | no                       | 238                         | AIK25664.1     | Rep1 [Hyposoter didymator ichnovirus]                         | 263         | 1.00E-124      | 180/239(75%)   |                                                                              |
| scaffold127348               | Hd40                     | 3494                                | 926528-930021                        | U2_Hd40            | 926730-927180 - strand     | no                       | 148                         | AIK25622.1     | U2 [Hyposoter didymator ichnovirus]                           | 115         | 2.00E-69       | 101/104(97%)   | pb (insertion) within CDS                                                    |
| scaffold127348               | Hd40                     | 3494                                | 926528-930021                        | U1_Hd40            | 928473-928898 - strand     | no                       | 142                         | AIK25621.1     | U1 [Hyposoter didymator ichnovirus]                           | 143         | 5.00E-75       | 116/142(82%)   |                                                                              |
| scaffold175                  | Hd38                     | 3664                                | 3800393-3804056                      | U1_Hd38            | 3800677-3801003 - strand   | no                       | 108                         | AIK25624.1     | U1 [Hyposoter didymator ichnovirus]                           | 108         | 3.00E-69       | 105/108(97%)   | insertion of a stop codon within CDS                                         |
| scaffold175                  | Hd38                     | 3664                                | 3800393-3804056                      | Vinx1_Hd38         | 3801226-3802356 + strand   | no                       | 377                         | AIK25625.1     | Vinx1 [Hyposoter didymator ichnovirus]                        | 377         | 0.00E+00       | 362/377(96%)   |                                                                              |
| scaffold175                  | Hd38                     | 3664                                | 3800393-3804056                      | U2_Hd38            | 3802480-3802809 - strand   | no                       | 109                         | AIK25626.1     | F1U2 [Hyposoter didymator ichnovirus]                         | 107         | 5.00E-68       | 101/107(94%)   | insertion of a stop codon within CDS                                         |
| scaffold65                   | Hd37                     | 3708                                | 342293-346000                        | U1_Hd37            | 342555-342665 - strand     | no                       | 36                          | AIK25627.1     | U1 [Hyposoter didymator ichnovirus]                           | 143         | 2.00E-16       | 36/36(100%)    | partial; corresponds to the N-term of the protein (aa 1-36)                  |
| scaffold65                   | Hd37                     | 3708                                | 342293-346000                        | Rep1_Hd37          | 343245-344048 + strand     | no                       | 268                         | AIK25629.1     | Rep1 [Hyposoter didymator ichnovirus]                         | 268         | 0.00E+00       | 262/268(98%)   |                                                                              |
| scaffold65                   | Hd37                     | 3708                                | 342293-346000                        | U2_Hd37            | 344748-344996 - strand     | no                       | 82                          | AIK25628.1     | U2 [Hyposoter didymator ichnovirus]                           | 146         | 1.00E-46       | 76/82(93%)     | partial; corresponds to the C-term of the protein (aa 65-146) and one of the |
| scaffold116                  | Hd35                     | 3710                                | 473341-477050                        | Rep1_Hd35          | 475117-475821 + strand     | no                       | 235                         | AIK25632.1     | Rep1 [Hyposoter didymator ichnovirus]                         | 235         | 9.00E-177      | 234/235(99%)   |                                                                              |
| scaffold175                  | Hd36                     | 3738                                | 3796140-3799877                      | U1_Hd36            | 3797417-3797740 + strand   | no                       | 107                         | AIK25630.1     | F1U1 [Hyposoter didymator ichnovirus]                         | 107         | 2.00E-70       | 102/107(95%)   | start codon modified (ATT instead of ATG in NCBI seq)                        |
| scaffold175                  | Hd36                     | 3738                                | 3796140-3799877                      | Vinx1_Hd36         | 3797918-3799006 - strand   | no                       | 363                         | AAO16963.1     | viral innexin [Hyposoter didymator ichnovirus]                | 363         | 0.00E+00       | 335/363(92%)   |                                                                              |
| scaffold91                   | Hd33                     | 3835                                | 485063-488897                        | U1_Hd33            | 485760-486020 - strand     | no                       | 86                          |                | No significant similarity found                               |             |                |                | low transcription in parasitized lep larvae                                  |
| scaffold91                   | Hd33                     | 3835                                | 485063-488897                        | U2_Hd33            | 487963-488427 - strand     | no                       | 154                         |                | No significant similarity found                               |             |                |                |                                                                              |
| scaffold127548               | Hd27                     | 4002                                | 13338255-13342256                    | U1_Hd27            | 13338842-13339126 + strand | no                       | 94                          | AIK25654.1     | U1 [Hyposoter didymator ichnovirus]                           | 113         | 6.00E-62       | 92/93(99%)     | modified start codon                                                         |
| scaffold127548               | Hd27                     | 4002                                | 13338255-13342256                    | K19_Hd27           | 13340915-13341354 - strand | yes                      | 106                         | AAF91314.1     | P12 [Hyposoter didymator ichnovirus]                          | 106         | 2.00E-71       | 105/106(99%)   |                                                                              |
| scaffold29771                | Hd46                     | 4109                                | 19344-23452                          | Vank_Hd46          | 20304-20807 + strand       | no                       | 167                         | YP_00103123    | vankyrin-b1 [Hyposoter fugitivus ichnovirus]                  | 167         | 9.00E-86       | 127/165(77%)   |                                                                              |
| scaffold127549               | Hd31-34                  | 4119                                | 144445-148563                        | U1_Hd31-34         | 145530-145901 + strand     | no                       | 124                         | AIK25633.1     | F4U1 [Hyposoter didymator ichnovirus]                         | 124         | 1.00E-71       | 121/124(98%)   |                                                                              |
| scaffold127549               | Hd31-34                  | 4119                                | 144445-148563                        | U2_Hd31-34         | 146442-146729 - strand     | no                       | 95                          | AIK25634.1     | F5U2 [Hyposoter didymator ichnovirus]                         | 124         | 3.00E-64       | 94/95(99%)     | shorter in C-term                                                            |
| scaffold22                   | Hd39                     | 4122                                | 1002620-1006741                      | Rep1_Hd39          | 1003991-1004692 - strand   | no                       | 234                         | AIK25623.1     | Rep1 [Hyposoter didymator ichnovirus]                         | 234         | 9.00E-170      | 227/234(97%)   |                                                                              |
| scaffold1868                 | Hd43                     | 4159                                | 193639-197797                        | U1_Hd43            | 194377-194676 - strand     | no                       | 100                         | AIK25617.1     | U1 [Hyposoter didymator ichnovirus]                           | 100         | 3.00E-67       | 97/100(97%)    |                                                                              |
| scaffold1868                 | Hd43                     | 4159                                | 193639-197797                        | Vank1_Hd43         | 196094-196618 - strand     | no                       | 175                         | AIK25618.1     | Vank1 [Hyposoter didymator ichnovirus]                        | 175         | 1.00E-125      | 171/175(98%)   |                                                                              |
| scaffold67                   | Hd30                     | 4164                                | 5867182-5871345                      | U1_Hd30            | 5867451-5867846 + strand   | no                       | 131                         | AIK25641.1     | U1 [Hyposoter didymator ichnovirus]                           | 104         | 3.00E-67       | 100/104(96%)   | longer in C-term                                                             |
| scaffold67                   | Hd30                     | 4164                                | 5867182-5871345                      | U2_Hd30            | 5867871-5868734 - strand   | no                       | 288                         | AIK25642.1     | U2 [Hyposoter didymator ichnovirus]                           | 288         | 0.00E+00       | 284/288(99%)   |                                                                              |
| scaffold67                   | Hd30                     | 4164                                | 5867182-5871345                      | Vinx1_Hd30         | 5869217-5870347 - strand   | no                       | 376                         | AIK25643.1     | Vinx1 [Hyposoter didymator ichnovirus]                        | 376         | 0.00E+00       | 375/376(99%)   |                                                                              |
| scaffold67                   | Hd30                     | 4164                                | 5867182-5871345                      | U3_Hd30            | 5870662-5870985 + strand   | no                       | 107                         | AIK25644.1     | U3 [Hyposoter didymator ichnovirus]                           | 107         | 2.00E-68       | 105/107(98%)   |                                                                              |
| scaffold161                  | Hd25                     | 4174                                | 2449400-2453573                      | PRRP3_Hd25         | 2450118-2450525 + strand   | no                       | 136                         | AIK25660.1     | PRRP2 [Hyposoter didymator ichnovirus]                        | 136         | 1.00E-83       | 136/136(100%)  |                                                                              |
| scaffold161                  | Hd25                     | 4174                                | 2449400-2453573                      | PRRP2_Hd25         | 2451908-2452147 - strand   | no                       | 80                          | AIK25661.1     | PRRP3 [Hyposoter didymator ichnovirus]                        | 80          | 7.00E-46       | 75/80(94%)     |                                                                              |
| scaffold161                  | Hd25                     | 4174                                | 2449400-2453573                      | PRRP1_Hd25         | 2452642-2452827 - strand   | no                       | 61                          | AIK25659.1     | PRRP1 [Hyposoter didymator ichnovirus]                        | 61          | 4.00E-09       | 58/61(95%)     |                                                                              |
| scaffold28498                | Hd45.1                   | NA                                  | 1-4214 (partial)                     | U1_Hd45.1          | 679-1541 - strand          | yes                      | 138                         | AAO33352.1     | unknown [Hyposoter didymator ichnovirus]                      | 138         | 3.00E-91       | 133/138(96%)   |                                                                              |
| scaffold28498                | Hd45.1                   | NA                                  | 1-4214 (partial)                     | U2_Hd45.1          | 3317-4180 - strand         | yes                      | 135                         | AIK25614.1     | D8 [Hyposoter didymator ichnovirus]                           | 138         | 3.00E-33       | 82/140(59%)    |                                                                              |
| scaffold119                  | Hd22                     | 4233                                | 698410-702642                        | U1_Hd22            | 698775-699101 - strand     | no                       | 109                         | AIK25666.1     | U1 [Hyposoter didymator ichnovirus]                           | 109         | 2.00E-72       | 106/109(97%)   |                                                                              |
| scaffold119                  | Hd22                     | 4233                                | 698410-702642                        | Rep1_Hd22          | 700424-701035 - strand     | no                       | 204                         | AAR89180.1     | repeat element protein 8 [Hyposoter didymator ichnovirus]     | 204         | 9.00E-150      | 204/204(100%)  |                                                                              |
| scaffold91                   | Hd29                     | 4356                                | 572514-576869                        | N1_Hd29            | 573680-574969 - strand     | no                       | 430                         | AIK25650.1     | N-gene1 [Hyposoter didymator ichnovirus]                      | 430         | 0.00E+00       | 427/430(99%)   |                                                                              |
| scaffold64                   | Hd21                     | 4368                                | 2353107-2357474                      | Rep1_Hd21          | 2353545-2354333 - strand   | no                       | 263                         | AIK25667.1     | Rep1 [Hyposoter didymator ichnovirus]                         | 263         | 0.00E+00       | 258/263(98%)   |                                                                              |
| scaffold64                   | Hd21                     | 4368                                | 2353107-2357474                      | Vinx1_Hd21         | 2355781-2356860 - strand   | no                       | 360                         | AIK25668.1     | Vinx1 [Hyposoter didymator ichnovirus]                        | 360         | 0.00E+00       | 356/360(99%)   |                                                                              |
| scaffold198                  | Hd19                     | 4440                                | 1265454-1269893                      | U1_Hd19            | 1266250-1268833 - strand   | yes                      | 618                         | AIK25671.1     | U1 [Hyposoter didymator ichnovirus]                           | 618         | 0.00E+00       | 606/618(98%)   |                                                                              |
| scaffold128213               | Hd23.1                   | 4457                                | 208205-212661                        | Rep1_Hd23.1        | 209796-210587 - strand     | no                       | 263                         | AIK25664.1     | Rep1 [Hyposoter didymator ichnovirus]                         | 263         | 0.00E+00       | 262/263(99%)   |                                                                              |
| scaffold127548               | Hd47                     | 4503                                | 12134587-12139089                    | Rep1_Hd47          | 12135113-12135841 - strand | no                       | 242                         | YP_00103131    | repeat element protein-d4.2 [Hyposoter fugitivus ichnovirus]  | 248         | 2.00E-122      | 166/238(70%)   |                                                                              |
| scaffold127548               | Hd47                     | 4503                                | 12134587-12139089                    | Rep2_Hd47          | 12136931-12137599 - strand | no                       | 222                         | YP_00103131    | repeat element protein-d4.1 [Hyposoter fugitivus ichnovirus]  | 255         | 4.00E-116      | 154/220(70%)   |                                                                              |
| scaffold264                  | Hd28                     | 4614                                | 135485-140098                        | Vinx1_Hd28         | 136611-137621 + strand     | no                       | 336                         | AIK25662.1     | Vinx1 [Hyposoter didymator ichnovirus]                        | 357         | 0.00E+00       | 301/334(90%)   |                                                                              |
| scaffold264                  | Hd28                     | 4614                                | 135485-140098                        | Vank1_Hd28         | 138475-138984 + strand     | no                       | 170                         | AFH35114.1     | vankyrin 1 [Hyposoter didymator ichnovirus]                   | 170         | 2.00E-122      | 168/170(99%)   |                                                                              |
| scaffold82201                | Hd51                     | 4632                                | 1077-5708                            | Rep1_Hd51          | 2537-3115 - strand         | no                       | 192                         | AIK25629.1     | Rep1 [Hyposoter didymator ichnovirus]                         | 268         | 2.00E-89       | 129/190(68%)   | no reads RNAseq                                                              |
| scaffold351                  | Hd18                     | 4696                                | 2681961-2686656                      | N1_Hd18            | 2683737-2685050 + strand   | no                       | 438                         | AIK25675.1     | N-gene1 [Hyposoter didymator ichnovirus]                      | 438         | 0.00E+00       | 434/438(99%)   |                                                                              |
| scaffold91                   | Hd24                     | 4697                                | 535698-540394                        | Vank1_Hd24         | 536918-537427 - strand     | no                       | 170                         | AFH35112.1     | vankyrin 1 [Hyposoter didymator ichnovirus]                   | 170         | 1.00E-123      | 170/170(100%)  |                                                                              |
| scaffold91                   | Hd24                     | 4697                                | 535698-540394                        | Vinx1_Hd24         | 538200-539270 - strand     | no                       | 357                         | AIK25662.1     | Vinx1 [Hyposoter didymator ichnovirus]                        | 357         | 0.00E+00       | 351/357(98%)   |                                                                              |
| scaffold128243               | Hd44.2                   | 4831                                | 4197203-4202033                      | Rep1_Hd44.2        | 4197838-4198440 - strand   | no                       | 200                         | YP_00103128    | repeat element protein-c11.1 [Hyposoter fugitivus ichnovirus] | 201         | 3.00E-58       | 106/186(57%)   |                                                                              |
| scaffold128243               | Hd44.2                   | 4831                                | 4197203-4202033                      | U1_Hd44.2          | 4199950-4200297 + strand   | no                       | 115                         | AIG88525.1     | hypothetical protein A7.1 [Diadegma fenestrale ichnovirus]    | 76          | 1.00E-20       | 56/76(74%)     | strand may be incorrect                                                      |
| scaffold91                   | Hd15                     | 4987                                | 469105-474091                        | N1_Hd15            | 470135-471607 - strand     | no                       | 491                         | AIK25681.1     | N-gene1 [Hyposoter didymator ichnovirus]                      | 491         | 0.00E+00       | 478/491(97%)   |                                                                              |
| scaffold175                  | Hd26                     | 5018                                | 10942034-10947051                    | PRRP1_Hd26         | 10943182-10943589 + strand | no                       | 136                         | AIK25646.1     | PRRP1 [Hyposoter didymator ichnovirus]                        | 136         | 2.00E-91       | 136/136(100%)  |                                                                              |

|                |      |      |                   |             |                            |     |      |                |                                                              |      |           |               |                                                             |
|----------------|------|------|-------------------|-------------|----------------------------|-----|------|----------------|--------------------------------------------------------------|------|-----------|---------------|-------------------------------------------------------------|
| scaffold175    | Hd26 | 5018 | 10942034-10947051 | PRRP2_Hd26  | 10945126-10945518 + strand | no  | 131  | AIK25645.1     | PRRP2 [Hyposoter didymator ichnovirus]                       | 131  | 4,00E-83  | 130/131(99%)  |                                                             |
| scaffold175    | Hd26 | 5018 | 10942034-10947051 | U1_Hd26     | 10946124-10946471 - strand | no  | 116  | AIK25658.1     | U1 [Hyposoter didymator ichnovirus]                          | 116  | 2,00E-80  | 116/116(100%) |                                                             |
| scaffold64     | Hd14 | 5196 | 36336-41531       | Vinx1_Hd14  | 38977-39405 + strand       | no  | 143  | AIK25682.1     | Vinx1 [Hyposoter didymator ichnovirus]                       | 143  | 5,00E-101 | 143/143(100%) |                                                             |
| scaffold64     | Hd14 | 5196 | 36336-41531       | U1_Hd14     | 41196-41501 + strand       | no  | 102  | AIK25683.1     | U1 [Hyposoter didymator ichnovirus]                          | 102  | 8,00E-70  | 102/102(100%) |                                                             |
| scaffold128246 | Hd49 | 5265 | 677866-683130     | Rep1_Hd49   | 678304-679005 + strand     | no  | 233  | YP_001031325.1 | repeat element protein-d7.2 [Hyposoter fugitivus ichnovirus] | 242  | 1,00E-119 | 173/232(75%)  |                                                             |
| scaffold128246 | Hd49 | 5265 | 677866-683130     | Rep2_Hd49   | 679573-680190 + strand     | no  | 205  | YP_001031326.1 | repeat element protein-d7.3 [Hyposoter fugitivus ichnovirus] | 240  | 3,00E-114 | 160/205(78%)  |                                                             |
| scaffold128246 | Hd49 | 5265 | 677866-683130     | Rep3_Hd49   | 681373-682041 + strand     | no  | 222  | YP_001031323.1 | repeat element protein-d7.1 [Hyposoter fugitivus ichnovirus] | 255  | 5,00E-93  | 156/257(61%)  |                                                             |
| scaffold128241 | Hd13 | 5757 | 402487-408243     | Cys2_Hd13   | 403839-404424 - strand     | yes | 157  | AIK25685.1     | Cys2 [Hyposoter didymator ichnovirus]                        | 157  | 5,00E-94  | 133/157(85%)  |                                                             |
| scaffold128241 | Hd13 | 5757 | 402487-408243     | Cys1_Hd13   | 406027-406868 - strand     | yes | 162  | AIK25684.1     | Cys1 [Hyposoter didymator ichnovirus]                        | 162  | 1,00E-107 | 149/162(92%)  |                                                             |
| scaffold357    | Hd50 | 5787 | 2218373-2224159   | Vinx1_Hd50  | 2219976-2221058 + strand   | no  | 360  | YP_001031328.1 | innexin Vnx-d5.1 [Hyposoter fugitivus ichnovirus]            | 375  | 0,00E+00  | 280/357(78%)  |                                                             |
| scaffold357    | Hd50 | 5787 | 2218373-2224159   | Vinx2_Hd50  | 2221574-2222647 + strand   | no  | 357  | YP_001031329.1 | innexin Vnx-d5.2 [Hyposoter fugitivus ichnovirus]            | 378  | 7,00E-170 | 241/378(64%)  |                                                             |
| scaffold59     | Hd12 | 5902 | 674917-680818     | U1_Hd12     | 675013-675345 + strand     | no  | 111  | AIK25686.1     | U1 [Hyposoter didymator ichnovirus]                          | 111  | 9,00E-77  | 110/111(99%)  |                                                             |
| scaffold59     | Hd12 | 5902 | 674917-680818     | Rep1_Hd12   | 675996-676679 - strand     | no  | 228  | AIK25689.1     | Rep1 [Hyposoter didymator ichnovirus]                        | 228  | 1,00E-169 | 226/228(99%)  |                                                             |
| scaffold59     | Hd12 | 5902 | 674917-680818     | U2_Hd12     | 678859-679170 - strand     | no  | 104  | AIK25687.1     | U2 [Hyposoter didymator ichnovirus]                          | 104  | 2,00E-67  | 103/104(99%)  |                                                             |
| scaffold59     | Hd12 | 5902 | 674917-680818     | Rep2_Hd12   | 679544-680233 - strand     | no  | 230  | AIK25688.1     | Rep2 [Hyposoter didymator ichnovirus]                        | 230  | 1,00E-173 | 229/230(99%)  |                                                             |
| scaffold59     | Hd10 | 6507 | 2500377-2506883   | Rep3_Hd10   | 2501422-2502045 - strand   | no  | 208  | AIK25696.1     | Rep3 [Hyposoter didymator ichnovirus]                        | 208  | 9,00E-154 | 207/208(99%)  |                                                             |
| scaffold59     | Hd10 | 6507 | 2500377-2506883   | Rep2_Hd10   | 2502434-2503066 - strand   | no  | 211  | AIK25695.1     | Rep2 [Hyposoter didymator ichnovirus]                        | 211  | 3,00E-155 | 211/211(100%) |                                                             |
| scaffold59     | Hd10 | 6507 | 2500377-2506883   | Rep1_Hd10   | 2504201-2504872 - strand   | no  | 224  | AAR89179.1     | repeat element protein 7 [Hyposoter didymator ichnovirus]    | 224  | 4,00E-167 | 224/224(100%) |                                                             |
| scaffold144    | Hd20 | 6864 | 1449468-1456331   | Cys2_Hd20   | 1450485-1451362 - strand   | yes | 145  | AIK25636.1     | Cys1 [Hyposoter didymator ichnovirus]                        | 145  | 3,00E-104 | 144/145(99%)  |                                                             |
| scaffold144    | Hd20 | 6864 | 1449468-1456331   | Cys1_Hd20   | 1454299-1455511 - strand   | yes | 254  | AIK25669.1     | Cys1 [Hyposoter didymator ichnovirus]                        | 254  | 0,00E+00  | 252/254(99%)  |                                                             |
| scaffold377    | Hd8  | 7356 | 2186417-2193772   | U5_Hd8      | 2186651-2186968 + strand   | no  | 105  | AIK25705.1     | U4 [Hyposoter didymator ichnovirus]                          | 105  | 2,00E-71  | 103/105(98%)  |                                                             |
| scaffold377    | Hd8  | 7356 | 2186417-2193772   | U4_Hd8      | 2188345-2188632 - strand   | no  | 95   | YP_001031361.1 | [Hyposoter fugitivus ichnovirus]                             | 131  | 4,00E-07  | 46/131(35%)   |                                                             |
| scaffold377    | Hd8  | 7356 | 2186417-2193772   | U3_Hd8      | 2190149-2190466 + strand   | no  | 105  | AIK25702.1     | F6U1 [Hyposoter didymator ichnovirus]                        | 105  | 5,00E-71  | 102/105(97%)  |                                                             |
| scaffold377    | Hd8  | 7356 | 2186417-2193772   | U2_Hd8      | 2191793-2192095 - strand   | no  | 100  | AIK25703.1     | U2 [Hyposoter didymator ichnovirus]                          | 100  | 1,00E-64  | 98/100(98%)   |                                                             |
| scaffold377    | Hd8  | 7356 | 2186417-2193772   | U1_Hd8      | 2192394-2192693 + strand   | no  | 99   | AIK25704.1     | F6U3 [Hyposoter didymator ichnovirus]                        | 106  | 6,00E-44  | 71/75(95%)    |                                                             |
| scaffold59     | Hd16 | 7704 | 690205-697908     | Rep1_Hd16   | 690229-690951 - strand     | no  | 241  | AIK25680.1     | Rep1 [Hyposoter didymator ichnovirus]                        | 241  | 0,00E+00  | 241/241(100%) |                                                             |
| scaffold59     | Hd16 | 7704 | 690205-697908     | U2_Hd16     | 691425-691661 + strand     | no  | 78   |                | No significant similarity found                              |      |           |               | possibly not a CDS (low transcription in calyx)             |
| scaffold59     | Hd16 | 7704 | 690205-697908     | U1_Hd16     | 693257-693817 + strand     | no  | 187  | AIK25679.1     | U1 [Hyposoter didymator ichnovirus]                          | 187  | 9,00E-122 | 186/187(99%)  |                                                             |
| scaffold59     | Hd16 | 7704 | 690205-697908     | Rep2_Hd16   | 695154-695813 - strand     | no  | 219  | AAR89178.1     | repeat element protein 6 [Hyposoter didymator ichnovirus]    | 219  | 1,00E-159 | 213/219(97%)  |                                                             |
| scaffold59     | Hd16 | 7704 | 690205-697908     | Rep3_Hd16   | 696463-697149 - strand     | no  | 228  | AAR89177.1     | repeat element protein 5 [Hyposoter didymator ichnovirus]    | 228  | 9,00E-170 | 228/228(100%) |                                                             |
| scaffold351    | Hd17 | 7730 | 2329273-2337002   | Rep5_Hd17   | 2329743-2330387 - strand   | no  | 214  | AHY22036.1     | repeat element 36 [Diadegma semiclausum ichnovirus]          | 262  | 3,00E-124 | 174/214(81%)  |                                                             |
| scaffold351    | Hd17 | 7730 | 2329273-2337002   | Rep4_Hd17   | 2330936-2331505 - strand   | no  | 189  | AIK25678.1     | Rep1 [Hyposoter didymator ichnovirus]                        | 230  | 1,00E-120 | 166/182(91%)  |                                                             |
| scaffold351    | Hd17 | 7730 | 2329273-2337002   | Rep3_Hd17   | 2332279-2333010 - strand   | no  | 244  | AAO16957.1     | repeat element protein [Hyposoter didymator ichnovirus]      | 244  | 0,00E+00  | 244/244(100%) |                                                             |
| scaffold351    | Hd17 | 7730 | 2329273-2337002   | Rep2_Hd17   | 2334085-2334759 - strand   | no  | 225  | AAO16959.1     | repeat element protein [Hyposoter didymator ichnovirus]      | 225  | 5,00E-166 | 221/225(98%)  |                                                             |
| scaffold351    | Hd17 | 7730 | 2329273-2337002   | Rep1_Hd17   | 2335459-2336166 - strand   | no  | 236  | AIK25673.1     | Rep1 [Hyposoter didymator ichnovirus]                        | 236  | 4,00E-173 | 232/236(98%)  |                                                             |
| scaffold64     | Hd32 | 7916 | 88702-96617       | U1.2_Hd32   | 88842-89159 - strand       | no  | 105  | AIK25638.1     | U1 [Hyposoter didymator ichnovirus]                          | 105  | 5,00E-65  | 96/105(91%)   |                                                             |
| scaffold64     | Hd32 | 7916 | 88702-96617       | Vinx2_Hd32  | 90142-91254 - strand       | no  | 370  | AIK25637.1     | Vinx1 [Hyposoter didymator ichnovirus]                       | 366  | 0,00E+00  | 279/353(79%)  |                                                             |
| scaffold64     | Hd32 | 7916 | 88702-96617       | U1.1_Hd32   | 93443-93757 - strand       | no  | 105  | AIK25638.1     | U1 [Hyposoter didymator ichnovirus]                          | 105  | 6,00E-72  | 105/105(100%) |                                                             |
| scaffold64     | Hd32 | 7916 | 88702-96617       | Vinx1_Hd32  | 94429-95526 - strand       | no  | 366  | AIK25637.1     | Vinx1 [Hyposoter didymator ichnovirus]                       | 366  | 0,00E+00  | 366/366(100%) |                                                             |
| scaffold184    | Hd41 | 7953 | 3768924-3776876   | U1_Hd41     | 3769919-3770824 + strand   | yes | 152  | AIK25620.1     | U1 [Hyposoter didymator ichnovirus]                          | 197  | 9,00E-64  | 112/152(74%)  | N-term shorter                                              |
| scaffold184    | Hd41 | 7953 | 3768924-3776876   | U2_Hd41     | 3772675-3773716 + strand   | yes | 168  | AIK25614.1     | D8 [Hyposoter didymator ichnovirus]                          | 138  | 3,00E-22  | 72/170(42%)   |                                                             |
| scaffold184    | Hd41 | 7953 | 3768924-3776876   | U3_Hd41     | 3775212-3776089 + strand   | yes | 159  | AIK25620.1     | U1 [Hyposoter didymator ichnovirus]                          | 197  | 2,00E-22  | 59/96(61%)    |                                                             |
| scaffold127548 | Hd7  | 8066 | 6062921-6070986   | U1_Hd7      | 6065301-6068372 + strand   | no  | 1024 | AIK25706.1     | U1 [Hyposoter didymator ichnovirus]                          | 1080 | 0,00E+00  | 916/1080(85%) | repeated motif missing from the CDS                         |
| scaffold59     | Hd11 | 9190 | 2183512-2192701   | U1_Hd11     | 2184311-2184694 + strand   | no  | 128  | AIK25649.1     | U1 [Hyposoter didymator ichnovirus]                          | 128  | 8,00E-87  | 125/128(98%)  |                                                             |
| scaffold59     | Hd11 | 9190 | 2183512-2192701   | Rep1_Hd11   | 2184915-2185607 + strand   | no  | 231  | AIK25648.1     | Rep1 [Hyposoter didymator ichnovirus]                        | 231  | 7,00E-172 | 229/231(99%)  |                                                             |
| scaffold59     | Hd11 | 9190 | 2183512-2192701   | Vank1_Hd11  | 2186326-2186802 + strand   | no  | 159  | AFH35113.1     | vankyrin 1 [Hyposoter didymator ichnovirus]                  | 159  | 2,00E-113 | 159/159(100%) |                                                             |
| scaffold59     | Hd11 | 9190 | 2183512-2192701   | Vank5_Hd11  | 2187892-2188395 + strand   | no  | 168  | AFH35119.1     | vankyrin 5 [Hyposoter didymator ichnovirus]                  | 168  | 2,00E-123 | 168/168(100%) |                                                             |
| scaffold59     | Hd11 | 9190 | 2183512-2192701   | Vank4_Hd11  | 2188456-2189962 + strand   | no  | 169  | AFH35118.1     | vankyrin 4 [Hyposoter didymator ichnovirus]                  | 169  | 4,00E-123 | 168/169(99%)  |                                                             |
| scaffold59     | Hd11 | 9190 | 2183512-2192701   | Vank3_Hd11  | 2190561-2191067 + strand   | no  | 169  | AFH35117.1     | vankyrin 3 [Hyposoter didymator ichnovirus]                  | 169  | 1,00E-121 | 168/169(99%)  |                                                             |
| scaffold59     | Hd11 | 9190 | 2183512-2192701   | Vank2_Hd11  | 2191436-2191942 + strand   | no  | 169  | AFH35116.1     | vankyrin 2 [Hyposoter didymator ichnovirus]                  | 169  | 2,00E-116 | 163/169(96%)  |                                                             |
| scaffold59     | Hd11 | 9190 | 2183512-2192701   | Vank1p_Hd11 | 2192415-2192701 + strand   | no  | 95   | AFH35113.1     | vankyrin 1 [Hyposoter didymator ichnovirus]                  | 159  | 2,00E-58  | 88/95(93%)    | partial; corresponds to the N-term of the protein (aa 1-95) |
| scaffold429    | Hd48 | 9673 | 531833-541505     | Rep1_Hd48   | 533753-534487 - strand     | no  | 244  | AHY22018.1     | repeat element 27 [Diadegma semiclausum ichnovirus]          | 246  | 3,00E-127 | 175/245(71%)  |                                                             |
| scaffold429    | Hd48 | 9673 | 531833-541505     | Rep2_Hd48   | 538812-539549 - strand     | no  | 245  | YP_001031328.1 | repeat element protein-c7.1 [Hyposoter fugitivus ichnovirus] | 282  | 4,00E-133 | 179/244(73%)  |                                                             |

|                            |          |       |                   |                 |                            |     |      |            |                                                                                 |     |           |               |                                        |
|----------------------------|----------|-------|-------------------|-----------------|----------------------------|-----|------|------------|---------------------------------------------------------------------------------|-----|-----------|---------------|----------------------------------------|
| scaffold65                 | Hd3      | 10014 | 437082-447095     | Cys1_Hd3        | 438828-439558 - strand     | yes | 181  | AIK25727.1 | Cys1 [Hyposoter didymator ichnovirus]                                           | 181 | 4,00E-136 | 181/181(100%) |                                        |
| scaffold65                 | Hd3      | 10014 | 437082-447095     | Cys2_Hd3        | 440422-441241 - strand     | yes | 200  | AIK25728.1 | Cys2 [Hyposoter didymator ichnovirus]                                           | 200 | 1,00E-147 | 200/200(100%) |                                        |
| scaffold65                 | Hd3      | 10014 | 437082-447095     | Cys3_Hd3        | 442538-443060 - strand     | yes | 147  | AIK25729.1 | Cys3 [Hyposoter didymator ichnovirus]                                           | 147 | 3,00E-105 | 144/147(98%)  |                                        |
| scaffold65                 | Hd3      | 10014 | 437082-447095     | Cys4_Hd3        | 443574-444657 - strand     | yes | 267  | AIK25730.1 | Cys4 [Hyposoter didymator ichnovirus]                                           | 241 | 3,00E-168 | 232/267(87%)  |                                        |
| scaffold65                 | Hd3      | 10014 | 437082-447095     | Cys5_Hd3        | 445264-445755 - strand     | yes | 125  | AIK25731.1 | Cys5 [Hyposoter didymator ichnovirus]                                           | 125 | 3,00E-83  | 117/125(94%)  |                                        |
| scaffold377                | Hd4      | 10326 | 2459681-2470006   | Rep1_Hd4        | 2461072-2461818 - strand   | no  | 248  | AIK25721.1 | Rep1 [Hyposoter didymator ichnovirus]                                           | 248 | 0,00E+00  | 248/248(100%) |                                        |
| scaffold377                | Hd4      | 10326 | 2459681-2470006   | Rep2_Hd4        | 2462404-2463012 + strand   | no  | 202  | AIK25722.1 | Rep2 [Hyposoter didymator ichnovirus]                                           | 202 | 8,00E-144 | 197/202(98%)  |                                        |
| scaffold377                | Hd4      | 10326 | 2459681-2470006   | Rep3_Hd4        | 2463770-2464366 + strand   | no  | 198  | AIK25723.1 | Rep3 [Hyposoter didymator ichnovirus]                                           | 198 | 2,00E-145 | 198/198(100%) |                                        |
| scaffold377                | Hd4      | 10326 | 2459681-2470006   | Rep4_Hd4        | 2465099-2465706 + strand   | no  | 202  | AIK25724.1 | Rep4 [Hyposoter didymator ichnovirus]                                           | 202 | 6,00E-150 | 202/202(100%) |                                        |
| scaffold377                | Hd4      | 10326 | 2459681-2470006   | Rep5_Hd4        | 2466854-2467603 - strand   | no  | 249  | AIK25725.1 | Rep5 [Hyposoter didymator ichnovirus]                                           | 249 | 0,00E+00  | 246/249(99%)  |                                        |
| scaffold377                | Hd4      | 10326 | 2459681-2470006   | Rep6_Hd4        | 2468587-2469195 + strand   | no  | 202  | AIK25726.1 | Rep6 [Hyposoter didymator ichnovirus]                                           | 202 | 3,00E-149 | 200/202(99%)  |                                        |
| scaffold127548             | Hd6      | 10461 | 5808388-5818848   | Rep1_Hd6        | 5809242-5809907 + strand   | no  | 221  | AAO33572.1 | rep protein [Hyposoter didymator ichnovirus]                                    | 221 | 1,00E-164 | 221/221(100%) |                                        |
| scaffold127548             | Hd6      | 10461 | 5808388-5818848   | P30_Hd6         | 5810559-5811315 - strand   | yes | 159  | AIK25713.1 | P30 [Hyposoter didymator ichnovirus]                                            | 414 | 2,00E-64  | 121/131(92%)  | repeated motifs missing from the CDS   |
| scaffold127548             | Hd6      | 10461 | 5808388-5818848   | U1.1_Hd6        | 5814030-5814758 - strand   | yes | 151  | AIK25712.1 | U1 [Hyposoter didymator ichnovirus]                                             | 159 | 2,00E-94  | 151/159(95%)  |                                        |
| scaffold127548             | Hd6      | 10461 | 5808388-5818848   | U1.2_Hd6        | 5818232-5818829 - strand   | yes | 143  | AIK25712.1 | U1 [Hyposoter didymator ichnovirus]                                             | 159 | 7,00E-12  | 53/129(41%)   |                                        |
| scaffold127548             | Hd5      | 10510 | 12941242-12951751 | Vinx1_Hd5       | 12941923-12942945 - strand | no  | 340  | AIK25715.1 | Vinx1 [Hyposoter didymator ichnovirus]                                          | 340 | 0,00E+00  | 336/340(99%)  |                                        |
| scaffold127548             | Hd5      | 10510 | 12941242-12951751 | Vinx2_Hd5       | 12943091-12943896 - strand | no  | 267  | AIK25716.1 | Vinx2 [Hyposoter didymator ichnovirus]                                          | 180 | 1,00E-99  | 141/143(99%)  | pb within CDS                          |
| scaffold127548             | Hd5      | 10510 | 12941242-12951751 | U1_Hd5          | 12944615-12944923 - strand | no  | 102  | AIK25717.1 | U1 [Hyposoter didymator ichnovirus]                                             | 102 | 1,00E-65  | 98/102(96%)   |                                        |
| scaffold127548             | Hd5      | 10510 | 12941242-12951751 | Vinx3_Hd5       | 12945139-12946200 - strand | no  | 353  | AIK25718.1 | Vinx3 [Hyposoter didymator ichnovirus]                                          | 353 | 0,00E+00  | 352/353(99%)  |                                        |
| scaffold127548             | Hd5      | 10510 | 12941242-12951751 | Vinx4_Hd5       | 12947754-12948800 - strand | no  | 348  | AIK25719.1 | Vinx4 [Hyposoter didymator ichnovirus]                                          | 348 | 0,00E+00  | 346/348(99%)  |                                        |
| scaffold127548             | Hd5      | 10510 | 12941242-12951751 | Vinx5_Hd5       | 12950651-12951697 - strand | no  | 348  | AAR82838.1 | innexin-like protein 2 [Hyposoter didymator ichnovirus]                         | 348 | 0,00E+00  | 346/348(99%)  |                                        |
| scaffold127548             | Hd5      | 10510 | 12941242-12951751 | Vinx6_Hd5       | 12952927-12953967 - strand | no  | 346  | AAR82840.1 | innexin-like protein 4 [Hyposoter didymator ichnovirus]                         | 393 | 0,00E+00  | 334/343(97%)  |                                        |
| scaffold127548             | Hd2      | 13937 | 5940296-5954232   | GlyPro1_Hd2     | 5941600-5943451 + strand   | yes | 452  | AAF08193.1 | glycine and proline-rich protein P45 precursor [Hyposoter didymator ichnovirus] | 452 | 0,00E+00  | 451/452(99%)  |                                        |
| scaffold127548             | Hd2      | 13937 | 5940296-5954232   | U1_Hd2          | 5944265-5944609 - strand   | no  | 115  | AIK25733.1 | F2U1 [Hyposoter didymator ichnovirus]                                           | 115 | 5,00E-77  | 115/115(100%) |                                        |
| scaffold127548             | Hd2      | 13937 | 5940296-5954232   | U2_Hd2          | 5945077-5945436 + strand   | no  | 120  | AAO33351.1 | unknown [Hyposoter didymator ichnovirus]                                        | 120 | 8,00E-79  | 120/120(100%) |                                        |
| scaffold127548             | Hd2      | 13937 | 5940296-5954232   | GlyPro2_Hd2     | 5946971-5951238 + strand   | yes | 1357 | AAF08192.1 | glycine and proline-rich protein P69 precursor [Hyposoter didymator ichnovirus] | 683 | 6,00E-157 | 417/786(53%)  | differences in the repeated region     |
| scaffold127548             | Hd2      | 13937 | 5940296-5954232   | SerThr1_Hd2     | 5952553-5953461 + strand   | yes | 216  | AIK25709.1 | SerThr [Hyposoter didymator ichnovirus]                                         | 216 | 2,00E-153 | 211/216(98%)  |                                        |
| scaffold90                 | Hd1      | NA    | 1-14771 (partial) | U6_Hd1          | 3039-3506 + strand         | no  | 156  | AIK25750.1 | F9U13 [Hyposoter didymator ichnovirus]                                          | 156 | 6,00E-109 | 153/156(98%)  |                                        |
| scaffold90                 | Hd1      | NA    | 1-14771 (partial) | U5_Hd1          | 4779-5282 - strand         | no  | 168  | AIK25739.1 | F8U2 [Hyposoter didymator ichnovirus]                                           | 168 | 9,00E-119 | 168/168(100%) |                                        |
| scaffold90                 | Hd1      | NA    | 1-14771 (partial) | U4_Hd1          | 6629-7054 + strand         | no  | 142  | AIK25738.1 | F7U1 [Hyposoter didymator ichnovirus]                                           | 142 | 2,00E-99  | 142/142(100%) |                                        |
| scaffold90                 | Hd1      | NA    | 1-14771 (partial) | U3_Hd1          | 8197-8511 - strand         | no  | 105  | AIK25745.1 | F11U8 [Hyposoter didymator ichnovirus]                                          | 106 | 2,00E-46  | 82/106(77%)   |                                        |
| scaffold90                 | Hd1      | NA    | 1-14771 (partial) | U2_Hd1          | 8984-9325 - strand         | no  | 114  | AIK25746.1 | U9 [Hyposoter didymator ichnovirus]                                             | 114 | 2,00E-79  | 114/114(100%) |                                        |
| scaffold90                 | Hd1      | NA    | 1-14771 (partial) | U1_Hd1          | 12650-12967 - strand       | no  | 105  | AIK25745.1 | F11U8 [Hyposoter didymator ichnovirus]                                          | 106 | 2,00E-46  | 82/106(77%)   |                                        |
| scaffold128215             | Hd9      | 17892 | 526917-544808     | U1.3_Hd9        | 527725-528057 - strand     | no  | 110  | AIK25698.1 | U1 [Hyposoter didymator ichnovirus]                                             | 111 | 3,00E-32  | 81/110(74%)   |                                        |
| scaffold128215             | Hd9      | 17892 | 526917-544808     | U5.2_Hd9        | 529943-530425 + strand     | no  | 160  |            | No significant similarity found                                                 |     |           |               |                                        |
| scaffold128215             | Hd9      | 17892 | 526917-544808     | U4.2_Hd9        | 531702-532277 - strand     | no  | 191  | AIK25701.1 | U4 [Hyposoter didymator ichnovirus]                                             | 116 | 1,00E-48  | 99/116(85%)   |                                        |
| scaffold128215             | Hd9      | 17892 | 526917-544808     | U3.2_Hd9        | 532913-533263 + strand     | no  | 117  | AIK25700.1 | U3 [Hyposoter didymator ichnovirus]                                             | 117 | 9,00E-76  | 112/117(96%)  |                                        |
| scaffold128215             | Hd9      | 17892 | 526917-544808     | U6.2_Hd9        | 533349-533735 + strand     | no  | 128  | AIK25748.1 | F7U11 [Hyposoter didymator ichnovirus]                                          | 111 | 6,00E-18  | 56/126(44%)   |                                        |
| scaffold128215             | Hd9      | 17892 | 526917-544808     | U1.2_Hd9        | 535076-535489 - strand     | no  | 137  | AIK25698.1 | U1 [Hyposoter didymator ichnovirus]                                             | 111 | 2,00E-30  | 76/110(69%)   |                                        |
| scaffold128215             | Hd9      | 17892 | 526917-544808     | U5.1_Hd9        | 537399-537881 + strand     | no  | 160  |            | No significant similarity found                                                 |     |           |               |                                        |
| scaffold128215             | Hd9      | 17892 | 526917-544808     | U4.1_Hd9        | 539200-539775 - strand     | no  | 191  | AIK25701.1 | U4 [Hyposoter didymator ichnovirus]                                             | 116 | 5,00E-48  | 99/116(85%)   |                                        |
| scaffold128215             | Hd9      | 17892 | 526917-544808     | U3.1_Hd9        | 540411-540941 + strand     | no  | 176  | AIK25700.1 | U3 [Hyposoter didymator ichnovirus]                                             | 117 | 2,00E-72  | 110/117(94%)  |                                        |
| scaffold128215             | Hd9      | 17892 | 526917-544808     | U6.1_Hd9        | 540847-541233 + strand     | no  | 128  | AIK25748.1 | F7U11 [Hyposoter didymator ichnovirus]                                          | 111 | 8,00E-18  | 60/128(47%)   |                                        |
| scaffold128215             | Hd9      | 17892 | 526917-544808     | U2_Hd9          | 541468-541782 - strand     | no  | 105  | AIK25699.1 | U2 [Hyposoter didymator ichnovirus]                                             | 104 | 3,00E-67  | 102/105(97%)  |                                        |
| scaffold128215             | Hd9      | 17892 | 526917-544808     | U1.1_Hd9        | 543144-543476 - strand     | no  | 111  | AIK25698.1 | U1 [Hyposoter didymator ichnovirus]                                             | 111 | 3,00E-70  | 110/111(99%)  |                                        |
| <b>H. didymator IVSPER</b> |          |       |                   |                 |                            |     |      |            |                                                                                 |     |           |               |                                        |
| scaffold127548             | IVSPER-5 | 1629  | 10860001-10861630 | U35             | 10860001-10860537 + strand | no  | 178  | AKD28058.1 | hypothetical protein [Glypta fumiferanae] gene="U26"                            | 180 | 1,00E-29  | 60/150(40%)   | transcribed in calyx                   |
| scaffold127548             | IVSPER-5 | 1629  | 10860001-10861630 | U36             | 10861166-10861630 - strand | no  | 154  | AKD28080.1 | hypothetical protein [Glypta fumiferanae] gene="U38"                            | 175 | 3,00E-14  | 45/144(31%)   | transcribed in calyx                   |
| scaffold29771              | IVSP_U37 | 1839  | 16848-18686       | single CDS: U37 | 16848-18686 + strand       | no  | 612  | AKD28048.1 | helicase-primase domain [Glypta fumiferanae]                                    | 721 | 0,00E+00  | 340/625(54%)  |                                        |
| scaffold91                 | IVSPER-1 | 14020 | 453857-467876     | U1              | 453857-454591 + strand     | no  | 244  | ADI40452.1 | unknown [Hyposoter didymator]                                                   | 244 | 0,00E+00  | 241/243(99%)  |                                        |
| scaffold91                 | IVSPER-1 | 14020 | 453857-467876     | IVSP1-1         | 455614-456375 + strand     | no  | 253  | ADI40453.1 | unknown [Hyposoter didymator]                                                   | 253 | 0,00E+00  | 245/253(97%)  |                                        |
| scaffold91                 | IVSPER-1 | 14020 | 453857-467876     | U2              | 456897-457582 - strand     | no  | 228  | ADI40454.1 | unknown [Hyposoter didymator]                                                   | 228 | 3,00E-171 | 228/228(100%) |                                        |
| scaffold91                 | IVSPER-1 | 14020 | 453857-467876     | U3              | 458215-458709 + strand     | no  | 164  | ADI40455.1 | unknown [Hyposoter didymator]                                                   | 162 | 2,00E-119 | 162/162(100%) |                                        |
| scaffold91                 | IVSPER-1 | 14020 | 453857-467876     | U4              | 459123-459518 + strand     | no  | 131  | ADI40456.1 | unknown [Hyposoter didymator]                                                   | 131 | 5,00E-91  | 130/131(99%)  |                                        |
| scaffold91                 | IVSPER-1 | 14020 | 453857-467876     | p5-2            | 460033-461034 + strand     | no  | 333  | ADI40457.1 | unknown [Hyposoter didymator]                                                   | 333 | 0,00E+00  | 329/333(99%)  |                                        |
| scaffold91                 | IVSPER-1 | 14020 | 453857-467876     | U5              | 461470-462000 + strand     | no  | 176  | ADI40458.1 | unknown [Hyposoter didymator]                                                   | 176 | 6,00E-129 | 175/176(99%)  |                                        |
| scaffold91                 | IVSPER-1 | 14020 | 453857-467876     | IVSP2-1         | 462381-463910 + strand     | no  | 509  | ADI40459.1 | unknown [Hyposoter didymator]                                                   | 509 | 0,00E+00  | 508/509(99%)  |                                        |
| scaffold91                 | IVSPER-1 | 14020 | 453857-467876     | N-1             | 464563-466050 + strand     | no  | 495  | ADI40460.1 | unknown [Hyposoter didymator]                                                   | 470 | 0,00E+00  | 467/470(99%)  | N-term longer                          |
| scaffold91                 | IVSPER-1 | 14020 | 453857-467876     | U25             | 467172-467876 - strand     | no  | 234  | AKD28083.1 | ring finger domain [Glypta fumiferanae]                                         | 237 | 7,00E-14  | 37/118(31%)   | putative IVSPER gene; may be wasp gene |

|                |          |       |                   |         |                            |    |      |            |                                                      |      |           |                |  |                                                                        |
|----------------|----------|-------|-------------------|---------|----------------------------|----|------|------------|------------------------------------------------------|------|-----------|----------------|--|------------------------------------------------------------------------|
| scaffold127548 | IVSPER-4 | 15811 | 6832835-6848646   | U29     | 6832835-6833713 - strand   | no | 292  |            | No significant similarity found                      |      |           |                |  | highly transcribed in calyx                                            |
| scaffold127548 | IVSPER-4 | 15811 | 6832835-6848646   | U30     | 6834523-6838368 - strand   | no | 1281 | AKD28060.1 | hypothetical protein [Glypta fumiferanae] gene="U28" | 1322 | 0,00E+00  | 616/1339(46%)  |  |                                                                        |
| scaffold127548 | IVSPER-4 | 15811 | 6832835-6848646   | U31     | 6839646-6840788 + strand   | no | 380  | AKD28063.1 | hypothetical protein [Glypta fumiferanae] gene="U31" | 370  | 8,00E-27  | 93/323(29%)    |  | transcribed in calyx                                                   |
| scaffold127548 | IVSPER-4 | 15811 | 6832835-6848646   | U32     | 6841304-6841912 + strand   | no | 202  |            | No significant similarity found                      |      |           |                |  | transcribed in calyx                                                   |
| scaffold127548 | IVSPER-4 | 15811 | 6832835-6848646   | U33     | 6842790-6844940 - strand   | no | 716  |            | No significant similarity found                      |      |           |                |  | transcribed in calyx                                                   |
| scaffold127548 | IVSPER-4 | 15811 | 6832835-6848646   | U34     | 6845548-6848646 - strand   | no | 1032 | AKD28054.1 | helicase domain [Glypta fumiferanae]                 | 1012 | 0,00E+00  | 488/1040(47%)  |  |                                                                        |
| scaffold127548 | IVSPER-3 | 25432 | 10761570-10787001 | U15     | 10761570-10762802 - strand | no | 410  | ADI40477.1 | unknown [Hyposoter didymator]                        | 410  | 0,00E+00  | 407/410(99%)   |  |                                                                        |
| scaffold127548 | IVSPER-3 | 25432 | 10761570-10787001 | IVSP3-2 | 10763133-10765037 + strand | no | 634  | ADI40478.1 | unknown [Hyposoter didymator]                        | 527  | 0,00E+00  | 526/527(99%)   |  | N-term 100aa longer in genomic seq                                     |
| scaffold127548 | IVSPER-3 | 25432 | 10761570-10787001 | U16     | 10765894-10767732 - strand | no | 612  | ADI40479.1 | unknown [Hyposoter didymator]                        | 612  | 0,00E+00  | 612/612(100%)  |  |                                                                        |
| scaffold127548 | IVSPER-3 | 25432 | 10761570-10787001 | U17     | 10768078-10768325 + strand | no | 82   | ADI40480.1 | unknown [Hyposoter didymator]                        | 82   | 1,00E-53  | 82/82(100%)    |  |                                                                        |
| scaffold127548 | IVSPER-3 | 25432 | 10761570-10787001 | U18     | 10769122-10769379 + strand | no | 85   | ADI40481.1 | unknown [Hyposoter didymator]                        | 85   | 7,00E-53  | 84/85(99%)     |  |                                                                        |
| scaffold127548 | IVSPER-3 | 25432 | 10761570-10787001 | p12-1   | 10770065-10770298 + strand | no | 77   | CAR31591.1 | p12-like 1 protein [Hyposoter didymator]             | 77   | 6,00E-45  | 77/77(100%)    |  |                                                                        |
| scaffold127548 | IVSPER-3 | 25432 | 10761570-10787001 | U19     | 10771340-10773322 + strand | no | 660  | ADI40483.1 | unknown [Hyposoter didymator]                        | 660  | 0,00E+00  | 658/660(99%)   |  |                                                                        |
| scaffold127548 | IVSPER-3 | 25432 | 10761570-10787001 | IVSP4-2 | 10774112-10775407 - strand | no | 431  | ADI40484.1 | unknown [Hyposoter didymator]                        | 431  | 0,00E+00  | 430/431(99%)   |  |                                                                        |
| scaffold127548 | IVSPER-3 | 25432 | 10761570-10787001 | U20     | 10776029-10776240 + strand | no | 70   | ADI40485.1 | unknown [Hyposoter didymator]                        | 70   | 6,00E-44  | 69/70(99%)     |  |                                                                        |
| scaffold127548 | IVSPER-3 | 25432 | 10761570-10787001 | U21     | 10776822-10777061 + strand | no | 79   | ADI40486.1 | unknown [Hyposoter didymator]                        | 79   | 4,00E-47  | 77/79(97%)     |  |                                                                        |
| scaffold127548 | IVSPER-3 | 25432 | 10761570-10787001 | U22     | 10777309-10778172 - strand | no | 287  | ADI40487.1 | unknown [Hyposoter didymator]                        | 257  | 0,00E+00  | 255/257(99%)   |  | N-term longer in genomic seq                                           |
| scaffold127548 | IVSPER-3 | 25432 | 10761570-10787001 | U28     | 10778369-10779088 + strand | no | 239  |            | No significant similarity found                      |      |           |                |  | newly identified, putative (no reads in calyx_1 transcriptome dataset) |
| scaffold127548 | IVSPER-3 | 25432 | 10761570-10787001 | U23     | 10779153-10780400 - strand | no | 415  | ADI40488.1 | unknown [Hyposoter didymator]                        | 415  | 0,00E+00  | 408/415(98%)   |  |                                                                        |
| scaffold127548 | IVSPER-3 | 25432 | 10761570-10787001 | p53-1   | 10780635-10781822 + strand | no | 395  | CAR31590.1 | p53-like 1 protein [Hyposoter didymator]             | 395  | 0,00E+00  | 391/395(99%)   |  |                                                                        |
| scaffold127548 | IVSPER-3 | 25432 | 10761570-10787001 | U24     | 10782094-10783785 - strand | no | 563  | ADI40490.1 | unknown [Hyposoter didymator]                        | 563  | 0,00E+00  | 561/563(99%)   |  |                                                                        |
| scaffold127548 | IVSPER-3 | 25432 | 10761570-10787001 | N-2     | 10785523-10787001 + strand | no | 492  | ADI40491.1 | unknown [Hyposoter didymator]                        | 492  | 0,00E+00  | 490/492(99%)   |  |                                                                        |
| scaffold91     | IVSPER-2 | 26611 | 541304-567914     | N-4     | 541304-542734 - strand     | no | 476  | ADI40491.1 | unknown [Hyposoter didymator] gene="N-2"             | 492  | 0,00E+00  | 277/491(56%)   |  |                                                                        |
| scaffold91     | IVSPER-2 | 26611 | 541304-567914     | U26     | 542904-543740 - strand     | no | 278  | AKD28081.1 | hypothetical protein [Glypta fumiferanae] Gf_U39     | 298  | 9,00E-30  | 59/139(42%)    |  |                                                                        |
| scaffold91     | IVSPER-2 | 26611 | 541304-567914     | IVSP2-2 | 544341-545867 - strand     | no | 508  | ADI40476.1 | unknown, partial [Hyposoter didymator]               | 143  | 5,00E-96  | 143/143(100%)  |  | completed IVSP2-2 sequence                                             |
| scaffold91     | IVSPER-2 | 26611 | 541304-567914     | IVSP4-1 | 546767-548107 + strand     | no | 446  | ADI40475.1 | unknown [Hyposoter didymator]                        | 446  | 0,00E+00  | 443/446(99%)   |  |                                                                        |
| scaffold91     | IVSPER-2 | 26611 | 541304-567914     | p12-2   | 548725-549038 - strand     | no | 104  | ADI40474.1 | unknown [Hyposoter didymator]                        | 104  | 6,00E-69  | 103/104(99%)   |  |                                                                        |
| scaffold91     | IVSPER-2 | 26611 | 541304-567914     | U27     | 549438-549740 + strand     | no | 100  |            | No significant similarity found                      |      |           |                |  |                                                                        |
| scaffold91     | IVSPER-2 | 26611 | 541304-567914     | U14     | 549917-550078 - strand     | no | 53   | ADI40473.1 | unknown [Hyposoter didymator]                        | 53   | 3,00E-29  | 53/53(100%)    |  |                                                                        |
| scaffold91     | IVSPER-2 | 26611 | 541304-567914     | p12-3   | 550341-550643 - strand     | no | 100  | ADI40472.1 | unknown [Hyposoter didymator]                        | 100  | 8,00E-68  | 100/100(100%)  |  |                                                                        |
| scaffold91     | IVSPER-2 | 26611 | 541304-567914     | U13     | 551219-551677 - strand     | no | 152  | ADI40471.1 | unknown [Hyposoter didymator]                        | 152  | 1,00E-107 | 152/152(100%)  |  |                                                                        |
| scaffold91     | IVSPER-2 | 26611 | 541304-567914     | U12     | 551947-552558 + strand     | no | 203  | ADI40470.1 | unknown [Hyposoter didymator]                        | 203  | 1,00E-147 | 203/203(100%)  |  |                                                                        |
| scaffold91     | IVSPER-2 | 26611 | 541304-567914     | U11     | 553154-554104 - strand     | no | 316  | ADI40469.1 | unknown [Hyposoter didymator]                        | 316  | 0,00E+00  | 312/316(99%)   |  |                                                                        |
| scaffold91     | IVSPER-2 | 26611 | 541304-567914     | U10     | 555456-559523 - strand     | no | 1355 | ADI40468.1 | unknown [Hyposoter didymator]                        | 1355 | 0,00E+00  | 1352/1355(99%) |  |                                                                        |
| scaffold91     | IVSPER-2 | 26611 | 541304-567914     | U9      | 559893-560717 + strand     | no | 274  | ADI40467.1 | unknown [Hyposoter didymator]                        | 274  | 0,00E+00  | 274/274(100%)  |  |                                                                        |
| scaffold91     | IVSPER-2 | 26611 | 541304-567914     | U8      | 561319-561552 + strand     | no | 77   | ADI40466.1 | unknown [Hyposoter didymator]                        | 77   | 3,00E-47  | 77/77(100%)    |  |                                                                        |
| scaffold91     | IVSPER-2 | 26611 | 541304-567914     | IVSP3-1 | 562225-564117 - strand     | no | 630  | ADI40465.1 | unknown [Hyposoter didymator]                        | 630  | 0,00E+00  | 625/630(99%)   |  |                                                                        |
| scaffold91     | IVSPER-2 | 26611 | 541304-567914     | IVSP1-2 | 564643-565380 - strand     | no | 245  | ADI40464.1 | unknown [Hyposoter didymator]                        | 196  | 5,00E-141 | 194/196(99%)   |  | N-term longer                                                          |
| scaffold91     | IVSPER-2 | 26611 | 541304-567914     | U7      | 565507-566145 - strand     | no | 212  | ADI40463.1 | unknown [Hyposoter didymator]                        | 212  | 4,00E-157 | 212/212(100%)  |  |                                                                        |
| scaffold91     | IVSPER-2 | 26611 | 541304-567914     | U6      | 566499-567548 - strand     | no | 349  | ADI40462.1 | unknown [Hyposoter didymator]                        | 349  | 0,00E+00  | 348/349(99%)   |  |                                                                        |
| scaffold91     | IVSPER-2 | 26611 | 541304-567914     | N-3     | 567663-567944 - strand     | no | 93   | ADI40461.1 | unknown [Hyposoter didymator]                        | 93   | 1,00E-60  | 90/93(97%)     |  |                                                                        |

#### Campoletis sonorensis

##### CsIV proviral segment

|               |          |      |                 |                          |                          |     |     |             |                                                                                       |           |                |              |                   |
|---------------|----------|------|-----------------|--------------------------|--------------------------|-----|-----|-------------|---------------------------------------------------------------------------------------|-----------|----------------|--------------|-------------------|
| scaffold_8749 | rep gene | 2269 | na              | rep gene 1               | 45-674 + strand          | no  | 209 | AHY22033.1  | repeat element 33 [Diadegma semiclausum ic 243                                        | 3,00E-64  | 101/213(47%)   |              |                   |
| scaffold_8748 | rep gene | 2287 | na              | rep gene 2               | TO CREATE (2285,,1713)   |     |     |             | there is no gene predicted in this scaffold; no possibility to click and drag feature |           |                |              |                   |
| scaffold_7280 | CsV      | 2380 | not applicable  | cys_CsV, partial         | 1546-nn + strand         | yes | NA  | YP_589077.1 | VHv1.4 protein [Campoletis sonorensis ichtnov 322                                     |           |                |              |                   |
| scaffold_11   | CsA      | 6368 | 861628-867995   | HP_CsA                   | 861717-862004 - strand   | no  | 95  |             | no significant similarity                                                             |           |                |              |                   |
| scaffold_11   | CsA      | 6368 | 861628-867995   | cys_CsA                  | 864776-865537 - strand   | yes | 177 | AAO43443.1  | AHv0.8 cys-motif protein precursor [Campolet 177                                      | 8,00E-127 | 173/177(98%)   |              |                   |
| scaffold_49   | CsB      | 6626 | 22030-28655     | rep_CsB                  | 23475-24182 - strand     | no  | 235 | AAA42923.1  | repeat element protein [Campoletis sonorensis: 235                                    | 2,00E-174 | 235/235(100%)  |              |                   |
| scaffold_49   | CsB      | 6626 | 22030-28655     | HP_CsB                   | 26564-27903 + strand     | yes | 220 |             | no significant similarity                                                             |           |                |              | may not be a gene |
| scaffold_28   | CsC      | 7350 | 25280-32629     | overlap with Cs_IVSPER-2 |                          |     |     |             |                                                                                       |           |                |              |                   |
| scaffold_17   | CsE      | 7990 | 1330025-1338014 | rep1_CsE                 | 1331076-1331756 - strand | no  | 226 | YP_00103133 | repeat element protein-d11.1 [Hyposoter fugiti 199                                    | 4,00E-06  | 42/175(24%)    |              |                   |
| scaffold_17   | CsE      | 7990 | 1330025-1338014 | rep2_CsE                 | 1333207-1333722 - strand | no  | 171 | YP_00103133 | repeat element protein-d11.1 [Hyposoter fugiti 199                                    | 0.004     | 33/133(25%)    |              |                   |
| scaffold_17   | CsE      | 7990 | 1330025-1338014 | rep3_CsE                 | 1336256-1336924 - strand | no  | 222 | AAA42923.1  | repeat element protein [Campoletis sonorensis: 235                                    | 8,00E-53  | 87/197(44%)    |              |                   |
| scaffold_131  | CsF      | 8155 | 808380-816534   | cys_CsF                  | 812667-814550 - strand   | yes | 403 | AY197491    | FHV1.4 cys-motif protein precursor [Campoleti 403                                     | 0.0       | 403/403 (100%) |              |                   |
| scaffold_10   | CsD      | 8168 | 961052-969219   | vnX_CsD                  | 963294-964382 - strand   | no  | 362 | AAO45828.1  | inXen Vnx-d1 [Campoletis sonorensis ichtnov 362                                       | 0.0       | 361/362(99%)   |              |                   |
| scaffold_10   | CsD      | 8168 | 961052-969219   | HP_CsD                   | 964936-965238 - strand   | no  | 100 |             | no significant similarity                                                             |           |                |              |                   |
| scaffold_14   | CsG2     | 8338 | 192247-200584   | rep1_CsG2                | 192863-193606 + strand   | no  | 247 | BAF45598.1  | c7-1.1 [Tranosema rostrale ichtnovirus]                                               | 248       | 5,00E-48       | 98/237(41%)  |                   |
| scaffold_14   | CsG2     | 8338 | 192247-200584   | rep2_CsG2                | 194788-195492 + strand   | no  | 234 | BAF45598.1  | c7-1.1 [Tranosema rostrale ichtnovirus]                                               | 248       | 2,00E-46       | 92/203(45%)  |                   |
| scaffold_14   | CsG2     | 8338 | 192247-200584   | rep3_CsG2                | 196511-197119 + strand   | no  | 202 | BAF45598.1  | c7-1.1 [Tranosema rostrale ichtnovirus]                                               | 248       | 1,00E-59       | 95/215(44%)  |                   |
| scaffold_14   | CsG2     | 8338 | 192247-200584   | rep4_CsG2                | 198753-199601 + strand   | no  | 282 | BAF45598.1  | c7-1.1 [Tranosema rostrale ichtnovirus]                                               | 248       | 1,00E-59       | 107/214(50%) |                   |
| scaffold_14   | CsG      | 8656 | 76017-84672     | vnX_CsG                  | 80980-82059 - strand     | no  | 359 | AAO45829.1  | inXen Vnx-g1 [Campoletis sonorensis ichtnov 359                                       | 0.0       | 359/359(100%)  |              |                   |

|               |      |       |                 |            |                          |     |     |              |                                                      |           |               |                            |  |
|---------------|------|-------|-----------------|------------|--------------------------|-----|-----|--------------|------------------------------------------------------|-----------|---------------|----------------------------|--|
| scaffold_14   | CsG  | 8656  | 76017-84672     | HP_CsG     | 83584-83949 + strand     | no  | 121 |              | no significant similarity                            |           |               |                            |  |
| scaffold_22   | CsI  | 8779  | 695663-704441   | rep1_CsI   | 696515-697228 + strand   | no  | 237 | AAA42923.1   | repeat element protein [Campeletis sonorensi: 235    | 3,00E-54  | 91/197(46%)   |                            |  |
| scaffold_22   | CsI  | 8779  | 695663-704441   | rep2_CsI   | 697713-698441 + strand   | no  | 242 | AAA42923.1   | repeat element protein [Campeletis sonorensi: 235    | 2,00E-62  | 98/199(49%)   |                            |  |
| scaffold_22   | CsI  | 8779  | 695663-704441   | HP_CsI     | 700059-700382 - strand   | no  | 107 |              | no significant similarity                            |           |               |                            |  |
| scaffold_22   | CsI  | 8779  | 695663-704441   | rep3_CsI   | 700879-701784 + strand   | no  | 301 | AAA42923.1   | repeat element protein [Campeletis sonorensi: 235    | 3,00E-51  | 96/190(51%)   |                            |  |
| scaffold_128  | CsI2 | 9042  | 110016-119057   | vank1_CsI2 | 110664-111179 - strand   | no  | 171 | AAX56959.1   | vankyrin 3 [Campeletis sonorensi ichnovirus] 171     | 3,00E-125 | 171/171(100%) |                            |  |
| scaffold_128  | CsI2 | 9042  | 110016-119057   | rep_CsI2   | 112670-113302 - strand   | no  | 210 | BAF45598.1   | c7-1.1 [Tranosema rostrale ichnovirus] 248           | 8,00E-61  | 98/187(52%)   |                            |  |
| scaffold_128  | CsI2 | 9042  | 110016-119057   | vank2_CsI2 | 114140-114607 - strand   | no  | 155 | AAX56957.1   | vankyrin 1 [Campeletis sonorensi ichnovirus] 155     | 2,00E-111 | 155/155(100%) |                            |  |
| scaffold_128  | CsI2 | 9042  | 110016-119057   | HP_CsI2    | 115736-116062 - strand   | no  | 108 |              | no significant similarity                            |           |               |                            |  |
| scaffold_128  | CsI2 | 9042  | 110016-119057   | vank3_CsI2 | 117111-117617 - strand   | no  | 168 | AAX56958.1   | vankyrin 2 [Campeletis sonorensi ichnovirus] 168     | 8,00E-121 | 168/168(100%) |                            |  |
| scaffold_38   | CsH  | 9050  | 1398066-1407115 | HP_CsH     | 1400102-1400407 - strand | no  | 101 |              | no significant similarity                            |           |               |                            |  |
| scaffold_38   | CsH  | 9050  | 1398066-1407115 | 5rep_CsH   | 1402633-1405449 + strand | no  | 938 | AAA42923.1   | repeat element protein [Campeletis sonorensi: 235    | 2,00E-41  | 89/215(41%)   |                            |  |
| scaffold_16   | CsX6 | 9213  | 504600-513812   | 2rep_CsX6  | 506770-507660 - strand   | no  | 296 | AAA42923.1   | repeat element protein [Campeletis sonorensi: 235    | 8,00E-45  | 84/175(48%)   |                            |  |
| scaffold_16   | CsX6 | 9213  | 504600-513812   | rep_CsX6   | 512155-512874 - strand   | no  | 239 | AAA42923.1   | repeat element protein [Campeletis sonorensi: 235    | 8,00E-57  | 95/203(47%)   |                            |  |
| scaffold_15   | CsJ  | 9484  | 2621922-2631405 | rep1_CsJ   | 2623490-2624194 + strand | no  | 234 | BAF45598.1   | c7-1.1 [Tranosema rostrale ichnovirus] 248           | 3,00E-59  | 98/216(45%)   |                            |  |
| scaffold_15   | CsJ  | 9484  | 2621922-2631405 | rep2_CsJ   | 2625029-2625739 - strand | no  | 236 | BAF45598.1   | c7-1.1 [Tranosema rostrale ichnovirus] 248           | 6,00E-50  | 91/218(42%)   |                            |  |
| scaffold_15   | CsJ  | 9484  | 2621922-2631405 | rep3_CsJ   | 2629669-2630322 + strand | no  | 217 | BAF45598.1   | c7-1.1 [Tranosema rostrale ichnovirus] 248           | 2,00E-37  | 80/187(43%)   |                            |  |
| scaffold_35   | CsX8 | 9999  | 164467-174465   | HP1_CsX8   | 165205-165672 - strand   | no  | 155 |              | no significant similarity                            |           |               |                            |  |
| scaffold_35   | CsX8 | 9999  | 164467-174465   | cys_CsX8   | 168692-172561 - strand   | yes | 581 | AAO43445.1   | LHv2.8 cys-motif protein precursor [Campeletis 678   | 0.0       | 409/671(61%)  |                            |  |
| scaffold_35   | CsX8 | 9999  | 164467-174465   | HP2_CsX8   | 172947-173360 - strand   | no  | 137 |              | no significant similarity                            |           |               |                            |  |
| scaffold_4391 | CsL  | 10024 | 8079-18102      | cys_CsL    | 10645-14521 - strand     | yes | 678 | AAO43445.1   | LHv2.8 cys-motif protein precursor [Campeletis 678   | 0.0       | 675/678(99%)  | shorter                    |  |
| scaffold_4391 | CsL  | 10024 | 8079-18102      | HP_CsL     | 16908-17306 + strand     | no  | 132 |              | no significant similarity                            |           |               |                            |  |
| scaffold_110  | CsX2 | 10806 | 248068-258873   | vank1_CsX2 | 249108-249605 + strand   | no  | 165 | ABH10021.1   | vankyrin 2 [Campeletis chloridae ichnovirus] 168     | 2,00E-105 | 144/165(87%)  |                            |  |
| scaffold_110  | CsX2 | 10806 | 248068-258873   | vank2_CsX2 | 251609-252118 + strand   | no  | 169 | AAX56956.1   | vankyrin 4 [Campeletis sonorensi ichnovirus] 160     | 2,00E-65  | 100/151(66%)  | short                      |  |
| scaffold_110  | CsX2 | 10806 | 248068-258873   | vank3_CsX2 | 252614-253099 + strand   | no  | 161 | AAX56955.1   | vankyrin 3 [Campeletis sonorensi ichnovirus] 161     | 9,00E-81  | 122/149(82%)  |                            |  |
| scaffold_110  | CsX2 | 10806 | 248068-258873   | vank4_CsX2 | 254294-254672 + strand   | no  | 125 | AAX56955.1   | vankyrin 3 [Campeletis sonorensi ichnovirus] 161     | 2,00E-23  | 62/147(42%)   |                            |  |
| scaffold_110  | CsX2 | 10806 | 248068-258873   | rep_CsX2   | 256559-257191 + strand   | no  | 210 | BAF45598.1   | c7-1.1 [Tranosema rostrale ichnovirus] 248           | 2,00E-60  | 94/189(50%)   |                            |  |
| scaffold_5    | CsN  | 10943 | 175169-186111   | N1_CsN     | 177111-178547 - strand   | no  | 478 | AAS79017.1   | NHv1.2 protein [Campeletis sonorensi ichnovirus] 400 | 0.0       | 305/404(75%)  |                            |  |
| scaffold_5    | CsN  | 10943 | 175169-186111   | N2_CsN     | 180542-181744 - strand   | no  | 400 | AAS79017.1   | NHv1.2 protein [Campeletis sonorensi ichnovirus] 400 | 0.0       | 400/400(100%) |                            |  |
| scaffold_5    | CsN  | 10943 | 175169-186111   | HP_CsN     | 185333-185656 + strand   | no  | 107 |              | no significant similarity                            |           |               |                            |  |
| scaffold_5218 | CsP  | 12113 | 15720-27832     | HP_CsP     | 19074-19379 - strand     | no  | 101 |              | no significant similarity                            |           |               |                            |  |
| scaffold_5218 | CsP  | 12113 | 15720-27832     | vank4_CsP  | 19628-20110 + strand     | no  | 160 | AAX56956.1   | vankyrin 4 [Campeletis sonorensi ichnovirus] 160     | 3,00E-114 | 159/160(99%)  |                            |  |
| scaffold_5218 | CsP  | 12113 | 15720-27832     | vank3_CsP  | 20609-21094 + strand     | no  | 161 | AAX56955.1   | vankyrin 3 [Campeletis sonorensi ichnovirus] 161     | 4,00E-115 | 161/161(100%) |                            |  |
| scaffold_5218 | CsP  | 12113 | 15720-27832     | vank2_CsP  | 23733-24215 + strand     | no  | 160 | AAX56954.1   | vankyrin 2 [Campeletis sonorensi ichnovirus] 160     | 1,00E-114 | 160/160(100%) |                            |  |
| scaffold_5218 | CsP  | 12113 | 15720-27832     | vank1_CsP  | 26747-27262 - strand     | no  | 171 | AAX56953.1   | vankyrin 1 [Campeletis sonorensi ichnovirus] 171     | 3,00E-124 | 171/171(100%) |                            |  |
| scaffold_23   | CsM  | 12197 | 1422227-1434423 | HP1_CsM    | 1425348-1425740 - strand | no  | 130 |              | no significant similarity                            |           |               |                            |  |
| scaffold_23   | CsM  | 12197 | 1422227-1434423 | N_CsM      | 1428224-1429615 + strand | no  | 463 | AAS79017.1   | NHv1.2 protein [Campeletis sonorensi ichnovirus] 400 | 3,00E-166 | 245/407(60%)  |                            |  |
| scaffold_23   | CsM  | 12197 | 1422227-1434423 | HP2_CsM    | 1431734-1432099 - strand | no  | 121 |              | no significant similarity                            |           |               |                            |  |
| scaffold_50   | CsQ  | 12543 | 290527-303069   | rep1_CsQ   | 291919-292629 - strand   | no  | 236 | AAA42923.1   | repeat element protein [Campeletis sonorensi: 235    | 2,00E-73  | 116/231(50%)  |                            |  |
| scaffold_50   | CsQ  | 12543 | 290527-303069   | vinx1_CsQ  | 294036-295118 - strand   | no  | 360 | YP_589076.1  | innexin-like protein 1 [Campeletis sonorensi i 369   | 0.0       | 323/328(98%)  |                            |  |
| scaffold_50   | CsQ  | 12543 | 290527-303069   | vinx2_CsQ  | 296198-297295 + strand   | no  | 365 | YP_589075.1  | innexin-like protein 2 [Campeletis sonorensi i 365   | 0.0       | 365/365(100%) |                            |  |
| scaffold_50   | CsQ  | 12543 | 290527-303069   | rep2_CsQ   | 299186-299929 - strand   | no  | 247 | AAA42923.1   | repeat element protein [Campeletis sonorensi: 235    | 9,00E-48  | 85/187(45%)   |                            |  |
| scaffold_50   | CsQ  | 12543 | 290527-303069   | rep3_CsQ   | 300417-301001 - strand   | no  | 194 | AAA42923.1   | repeat element protein [Campeletis sonorensi: 235    | 6,00E-45  | 83/191(43%)   |                            |  |
| scaffold_50   | CsQ  | 12543 | 290527-303069   | rep4_CsQ   | 301383-302144 - strand   | no  | 253 | AAA42923.1   | repeat element protein [Campeletis sonorensi: 235    | 2,00E-53  | 94/210(45%)   |                            |  |
| scaffold_6070 | CsO1 | 12746 | 168701-181446   | 4rep_CsO1  | 171805-173964 + strand   | no  | 719 | AAA42923.1   | repeat element protein [Campeletis sonorensi: 235    | 3,00E-43  | 83/184(45%)   |                            |  |
| scaffold_6070 | CsO1 | 12746 | 168701-181446   | HP1_CsO1   | 174818-175135 + strand   | no  | 105 |              | no significant similarity                            |           |               |                            |  |
| scaffold_6070 | CsO1 | 12746 | 168701-181446   | HP2_CsO1   | 176713-177060 + strand   | no  | 115 |              | no significant similarity                            |           |               |                            |  |
| scaffold_6070 | CsO1 | 12746 | 168701-181446   | 3rep_CsO1  | 177630-179456 + strand   | no  | 608 | AAA42923.1   | repeat element protein [Campeletis sonorensi: 235    | 5,00E-33  | 81/223(36%)   |                            |  |
| scaffold_149  | CsU  | 15338 | 374074-389411   | cys1_CsU   | 375123-375900 - strand   | yes | 180 | AAO43446.1   | UHV0.8a cys-motif protein precursor [Campeletis 180  | 8,00E-131 | 180/180(100%) | Number of Matches: 5       |  |
| scaffold_149  | CsU  | 15338 | 374074-389411   | cys2_CsU   | 377416-378140 - strand   | yes | 161 | AAO43447.1   | UHV0.8 cys-motif protein precursor [Campeletis 152   | 6,00E-54  | 91/151(60%)   |                            |  |
| scaffold_149  | CsU  | 15338 | 374074-389411   | cys3_CsU   | 383382-384157 - strand   | yes | 178 | AAO43446.1   | UHV0.8a cys-motif protein precursor [Campeletis 180  | 1,00E-62  | 96/164(59%)   |                            |  |
| scaffold_149  | CsU  | 15338 | 374074-389411   | cys4_CsU   | 385182-385875 - strand   | yes | 152 | AAO43447.1   | UHV0.8 cys-motif protein precursor [Campeletis 152   | 2,00E-108 | 152/152(100%) |                            |  |
| scaffold_149  | CsU  | 15338 | 374074-389411   | cys5_CsU   | 387355-388121 - strand   | yes | 175 | AAO43447.1   | UHV0.8 cys-motif protein precursor [Campeletis 152   | 2,00E-66  | 104/152(68%)  | NNN within the nt sequence |  |
| scaffold_28   | CsW  | 15807 | 614005-629811   | cys1_CsW   | 615213-616060 + strand   | yes | 203 | YP_589078.1  | cysteine-rich protein [Campeletis sonorensi i 203    | 3,00E-140 | 192/203(95%)  |                            |  |
| scaffold_28   | CsW  | 15807 | 614005-629811   | cys2_CsW   | 617470-618890 + strand   | yes | 261 | YP_589079.1  | cysteine-rich protein [Campeletis sonorensi i 198    | 8,00E-43  | 71/120(59%)   |                            |  |
| scaffold_28   | CsW  | 15807 | 614005-629811   | rep1_CsW   | 619946-620629 - strand   | no  | 227 | BAF73402.1   | f3.1 [Tranosema rostrale ichnovirus] 226             | 8,00E-73  | 107/222(48%)  |                            |  |
| scaffold_28   | CsW  | 15807 | 614005-629811   | cys3_CsW   | 622282-623280 + strand   | yes | 198 | YP_589079.1  | cysteine-rich protein [Campeletis sonorensi i 198    | 2,00E-145 | 198/198(100%) |                            |  |
| scaffold_28   | CsW  | 15807 | 614005-629811   | rep2_CsW   | 624629-625342 - strand   | no  | 237 | YP_001031326 | repeat element protein-b15.1 [Hyposoter fugiti 272   | 5,00E-80  | 122/237(51%)  |                            |  |
| scaffold_28   | CsW  | 15807 | 614005-629811   | HP_CsW     | 627004-627324 - strand   | no  | 106 |              | no significant similarity                            |           |               |                            |  |
| scaffold_28   | CsW  | 15807 | 614005-629811   | rep3_CsW   | 628358-629077 - strand   | no  | 239 | YP_001031313 | repeat element protein-d4.2 [Hyposoter fugiti 248    | 6,00E-98  | 132/226(58%)  |                            |  |
| scaffold_5890 | CsZ  | 15871 | 134147-150017   | rep1_CsZ   | 134843-135562 + strand   | no  | 239 | AHY22033.1   | repeat element 33 [Diadegma semiclausaum ic 243      | 5,00E-69  | 103/219(47%)  |                            |  |
| scaffold_5890 | CsZ  | 15871 | 134147-150017   | rep2_CsZ   | 137736-138422 + strand   | no  | 228 | AIK25648.1   | Rep1 [Hyposoter didymator ichnovirus] 231            | 9,00E-72  | 105/213(49%)  |                            |  |
| scaffold_5890 | CsZ  | 15871 | 134147-150017   | rep3_CsZ   | 139610-140290 + strand   | no  | 226 | BAF45626.1   | f3.2 [Tranosema rostrale ichnovirus] 237             | 3,00E-62  | 93/189(49%)   |                            |  |
| scaffold_5890 | CsZ  | 15871 | 134147-150017   | rep4_CsZ   | 140771-141505 + strand   | no  | 244 | AHY21950.1   | repeat element 11 [Diadegma semiclausaum ic 225      | 3,00E-55  | 87/202(43%)   |                            |  |
| scaffold_5890 | CsZ  | 15871 | 134147-150017   | rep5_CsZ   | 142565-143128 - strand   | no  | 187 | YP_001031313 | repeat element protein-d3.2 [Hyposoter fugiti 230    | 4,00E-51  | 87/178(49%)   |                            |  |
| scaffold_5890 | CsZ  | 15871 | 134147-150017   | rep6_CsZ   | 144223-144912 + strand   | no  | 229 | BAF45611.1   | d5.2 [Tranosema rostrale ichnovirus] 218             | 4,00E-72  | 107/206(52%)  |                            |  |

|                             |               |       |                 |            |                          |    |      |             |                                                    |             |           |               |                                                                  |
|-----------------------------|---------------|-------|-----------------|------------|--------------------------|----|------|-------------|----------------------------------------------------|-------------|-----------|---------------|------------------------------------------------------------------|
| scaffold_5890               | CsZ           | 15871 | 134147-150017   | rep7_CsZ   | 146321-147118 + strand   | no | 265  | BAF45598.1  | c7-1.1 [Tranosema rostrale ichnovirus]             | 248         | 3,00E-106 | 153/249(61%)  |                                                                  |
| scaffold_5934               | CsX1          | 17335 | 19391-36725     | vank1_CsX1 | 20620-21141 + strand     | no | 173  | AFH35119.1  | vankyrin 5 [Hyposoter didymator ichnovirus]        | 168         | 7,00E-43  | 75/164(46%)   |                                                                  |
| scaffold_5934               | CsX1          | 17335 | 19391-36725     | vmx1_CsX1  | 22756-23850 + strand     | no | 364  | AHY21960.1  | viral innexin 3 [Diadegma semiclausaum ichnovirus] | 357         | 7,00E-131 | 182/351(52%)  |                                                                  |
| scaffold_5934               | CsX1          | 17335 | 19391-36725     | rep1_CsX1  | 24562-25275 + strand     | no | 237  | BAF45598.1  | c7-1.1 [Tranosema rostrale ichnovirus]             | 248         | 6,00E-65  | 108/216(50%)  | NNN within the nt sequence                                       |
| scaffold_5934               | CsX1          | 17335 | 19391-36725     | vank2_CsX1 | 26300-26770 + strand     | no | 156  | AFH35115.1  | vankyrin 1 [Hyposoter didymator ichnovirus]        | 159         | 3,00E-52  | 82/152(54%)   | Number of Matches: 4                                             |
| scaffold_5934               | CsX1          | 17335 | 19391-36725     | vank3_CsX1 | 28742-29212 + strand     | no | 156  | YP_00103123 | vankyrin-b17 [Hyposoter fugitivus ichnovirus]      | 170         | 1,00E-46  | 78/156(50%)   | Number of Matches: 3                                             |
| scaffold_5934               | CsX1          | 17335 | 19391-36725     | vank4_CsX1 | 30120-30608 + strand     | no | 162  | YP_00103123 | vankyrin-b1 [Hyposoter fugitivus ichnovirus]       | 167         | 8,00E-55  | 88/162(54%)   |                                                                  |
| scaffold_5934               | CsX1          | 17335 | 19391-36725     | vmx2_CsX1  | 31535-32626 + strand     | no | 363  | BAF45609.1  | d4.1 [Tranosema rostrale ichnovirus]               | 376         | 3,00E-141 | 198/360(55%)  |                                                                  |
| scaffold_5934               | CsX1          | 17335 | 19391-36725     | rep2_CsX1  | 34635-35156 + strand     | no | 173  | BAF45626.1  | f3.2 [Tranosema rostrale ichnovirus]               | 237         | 3,00E-55  | 93/180(52%)   |                                                                  |
| scaffold_5934               | CsX1          | 17335 | 19391-36725     | vank5_CsX1 | 35714-36208 + strand     | no | 164  | ABH10021.1  | vankyrin 2 [Campoletis chloridae ichnovirus]       | 168         | 6,00E-50  | 80/163(49%)   |                                                                  |
| scaffold_116                | CsT           | 23217 | 7789-31005      | HP1_CsT    | 14790-15116 - strand     | no | 108  |             | no significant similarity                          |             |           |               |                                                                  |
| scaffold_116                | CsT           | 23217 | 7789-31005      | HP2_CsT    | 21883-22209 - strand     | no | 108  |             | no significant similarity                          |             |           |               |                                                                  |
| scaffold_116                | CsT           | 23217 | 7789-31005      | HP3_CsT    | 27023-27376 + strand     | no | 117  |             | no significant similarity                          |             |           |               |                                                                  |
| scaffold_116                | CsT           | 23217 | 7789-31005      | HP4_CsT    | 28660-29043 + strand     | no | 127  |             | no significant similarity                          |             |           |               |                                                                  |
| scaffold_8362               | CsX5, partial | >5297 | 1-5297          | rep1_CsX5  | 2289-3026 - strand       | no | 245  | AAA42923.1  | repeat element protein [Campoletis sonorensis]     | 235         | 3,00E-50  | 95/240(40%)   |                                                                  |
| scaffold_8362               | CsX5, partial | >5297 | 1-5297          | rep2_CsX5  | 3571-4296 + strand       | no | 241  | AAA42923.1  | repeat element protein [Campoletis sonorensis]     | 235         | 5,00E-57  | 104/233(45%)  |                                                                  |
| scaffold_6095               | CsX7, partial | >6041 | 183042-189082   | rep1_CsX7  | 183042-183731 - strand   | no | 229  | BAF45626.1  | f3.2 [Tranosema rostrale ichnovirus]               | 237         | 2,00E-76  | 112/202(55%)  |                                                                  |
| scaffold_6095               | CsX7, partial | >6041 | 183042-189082   | rep2_CsX7  | 185656-186273 - strand   | no | 235  | BAF45626.1  | f3.2 [Tranosema rostrale ichnovirus]               | 237         | 5,00E-72  | 106/201(53%)  |                                                                  |
| scaffold_6095               | CsX7, partial | >6041 | 183042-189082   | rep3_CsX7  | 188342-189082 - strand   | no | 246  | BAF45626.1  | f3.2 [Tranosema rostrale ichnovirus]               | 237         | 2,00E-74  | 112/201(56%)  |                                                                  |
| scaffold_60                 | CsX3, partial | >7876 | 304794-312669   | rep1_CsX3  | 304794-305507 + strand   | no | 237  | AHY22033.1  | repeat element 33 [Diadegma semiclausaum ic        | 243         | 1,00E-77  | 115/225(51%)  |                                                                  |
| scaffold_60                 | CsX3, partial | >7876 | 304794-312669   | rep2_CsX3  | 306761-307570 + strand   | no | 269  | BAF45598.1  | c7-1.1 [Tranosema rostrale ichnovirus]             | 248         | 2,00E-119 | 165/247(67%)  | Number of Matches: 2, NNN in 5'region on gene (position 507,725) |
| scaffold_60                 | CsX3, partial | >7876 | 304794-312669   | rep3_CsX3  | 309164-309979 + strand   | no | 271  | BAF45598.1  | c7-1.1 [Tranosema rostrale ichnovirus]             | 248         | 2,00E-115 | 162/247(66%)  |                                                                  |
| scaffold_60                 | CsX3, partial | >7876 | 304794-312669   | rep4_CsX3  | 311747-312586 + strand   | no | 279  | BAF45598.1  | c7-1.1 [Tranosema rostrale ichnovirus]             | 248         | 8,00E-116 | 158/237(67%)  |                                                                  |
| scaffold_13                 | CsX4, partial | >9181 | 1407384-1416564 | rep1_CsX4  | 1409287-1410012 - strand | no | 241  | AAA42923.1  | repeat element protein [Campoletis sonorensis]     | 235         | 5,00E-57  | 104/233(45%)  |                                                                  |
| scaffold_13                 | CsX4, partial | >9181 | 1407384-1416564 | rep2_CsX4  | 1410557-1411294 + strand | no | 245  | AAA42923.1  | repeat element protein [Campoletis sonorensis]     | 235         | 3,00E-50  | 95/240(40%)   |                                                                  |
| scaffold_13                 | CsX4, partial | >9181 | 1407384-1416564 | HP_CsX4    | 1411909-1412361 + strand | no | 150  |             | no significant similarity                          |             |           |               |                                                                  |
| scaffold_13                 | CsX4, partial | >9181 | 1407384-1416564 | rep3_CsX4  | 1415602-1416564 + strand | no | 320  | AAA42923.1  | repeat element protein [Campoletis sonorensis]     | 235         | 6,00E-51  | 96/232(41%)   |                                                                  |
| <b>C. sonorensis IVSPER</b> |               |       |                 |            |                          |    |      |             |                                                    |             |           |               |                                                                  |
| scaffold_6122               | IVSP_U36L     | 471   | 234803-235273   | U36L       | 234803-235273 - strand   | no | 156  | AKD28080.1  | hypothetical protein [Glypta fumiferanae]          | Gf_L 175    | 7,00E-15  | 49/146(34%)   |                                                                  |
| scaffold_12                 | IVSP_U37L     | 1863  | 104145-106007   | U37L-2     | 104145-106007 - strand   | no | 620  | AKD28048.1  | helicase-primase domain [Glypta fumiferanae]       | 721         | 0.0       | 337/621(54%)  |                                                                  |
| scaffold_16                 | Cs_IVSPER-5   | 3750  | 2424942-2428691 | IVSP1L-3   | 2424942-2425688 + strand | no | 248  | ADI40453.1  | unknown [Hyposoter didymator]                      | Hd_IVSP1-1  | 253       | 6,00E-57      | 104/257(40%)                                                     |
| scaffold_16                 | Cs_IVSPER-5   | 3750  | 2424942-2428691 | U2L        | 2426081-2426764 + strand | no | 227  | ADI40454.1  | unknown [Hyposoter didymator]                      | Hd_U2       | 228       | 3,00E-120     | 165/226(73%)                                                     |
| scaffold_16                 | Cs_IVSPER-5   | 3750  | 2424942-2428691 | U1L        | 2427951-2428691 - strand | no | 246  | ADI40452.1  | unknown [Hyposoter didymator]                      | Hd_U1       | 244       | 1,00E-65      | 101/245(41%)                                                     |
| scaffold_50                 | Cs_IVSPER-3   | 8610  | 218627-227236   | IVSP4L-2   | 218627-219940 - strand   | no | 437  | ADI40475.1  | unknown [Hyposoter didymator]                      | Hd_IVSP4-1  | 446       | 7,00E-156     | 217/399(54%)                                                     |
| scaffold_50                 | Cs_IVSPER-3   | 8610  | 218627-227236   | U4L        | 220560-221022 + strand   | no | 138  | ADI40456.1  | unknown [Hyposoter didymator]                      | Hd_U4       | 131       | 2,00E-29      | 52/118(44%)                                                      |
| scaffold_50                 | Cs_IVSPER-3   | 8610  | 218627-227236   | p53L-3     | 221232-222284 + strand   | no | 350  | CAR31590.1  | p53-like1 protein [Hyposoter didymator]            |             | 395       | 6,00E-67      | 139/337(41%)                                                     |
| scaffold_50                 | Cs_IVSPER-3   | 8610  | 218627-227236   | U5L        | 222667-223197 + strand   | no | 176  | ADI40458.1  | unknown [Hyposoter didymator]                      | Hd_U5       | 176       | 1,00E-74      | 105/174(60%)                                                     |
| scaffold_50                 | Cs_IVSPER-3   | 8610  | 218627-227236   | IVSP2L-2   | 223589-224965 + strand   | no | 458  | ADI40459.1  | unknown [Hyposoter didymator]                      | Hd_IVSP2-1  | 509       | 0.0           | 303/459(66%)                                                     |
| scaffold_50                 | Cs_IVSPER-3   | 8610  | 218627-227236   | CsN-3      | 225761-227236 + strand   | no | 491  | ADI40491.1  | unknown [Hyposoter didymator]                      | Hd_N-2      | 492       | 0.0           | 346/492(70%)                                                     |
| scaffold_57                 | Cs_IVSPER-4   | 9937  | 383305-393241   | U30L       | 383305-386526 + strand   | no | 1073 | AKD28060.1  | hypothetical protein [Glypta fumiferanae]          | Gf_L 1322   | 0.0       | 502/1044(48%) |                                                                  |
| scaffold_57                 | Cs_IVSPER-4   | 9937  | 383305-393241   | U34L       | 387873-390950 + strand   | no | 1025 | AKD28054.1  | helicase domain [Glypta fumiferanae]               | Hd_U34 1012 | 0.0       | 486/1009(48%) |                                                                  |
| scaffold_57                 | Cs_IVSPER-4   | 9937  | 383305-393241   | IVSP4L-3   | 391820-393241 - strand   | no | 473  | ADI40484.1  | unknown [Hyposoter didymator]                      | Hd_IVSP4-2  | 431       | 2,00E-169     | 230/405(57%)                                                     |
| scaffold_6122               | Cs_IVSPER-1   | 31594 | 122689-154282   | U15L       | 122689-123342 - strand   | no | 217  | ADI40477.1  | unknown [Hyposoter didymator]                      | Hd_U15      | 410       | 3,00E-97      | 130/212(61%)                                                     |
| scaffold_6122               | Cs_IVSPER-1   | 31594 | 122689-154282   | IVSP1L-1   | 124770-125432 + strand   | no | 220  | ADI40464.1  | unknown [Hyposoter didymator]                      | Hd_IVSP1-2  | 196       | 6,00E-63      | 99/197(50%)                                                      |
| scaffold_6122               | Cs_IVSPER-1   | 31594 | 122689-154282   | U37L-1     | 126353-128176 + strand   | no | 607  | AKD28048.1  | helicase-primase domain [Glypta fumiferanae]       | 721         | 0.0       | 338/624(54%)  |                                                                  |
| scaffold_6122               | Cs_IVSPER-1   | 31594 | 122689-154282   | U31L-1     | 129117-130226 - strand   | no | 369  | AKD28063.1  | hypothetical protein [Glypta fumiferanae]          | Gf_L 370    | 4,00E-32  | 95/341(28%)   |                                                                  |
| scaffold_6122               | Cs_IVSPER-1   | 31594 | 122689-154282   | U35L       | 130724-131257 - strand   | no | 177  | AKD28058.1  | hypothetical protein [Glypta fumiferanae]          | Gf_L 180    | 5,00E-37  | 70/156(45%)   |                                                                  |
| scaffold_6122               | Cs_IVSPER-1   | 31594 | 122689-154282   | Gf_U27L    | 132692-134518 + strand   | no | 608  | AKD28059.1  | hypothetical protein [Glypta fumiferanae]          | Gf_L 325    | 1,00E-31  | 97/312(31%)   |                                                                  |
| scaffold_6122               | Cs_IVSPER-1   | 31594 | 122689-154282   | U17L       | 135604-135929 + strand   | no | 79   | ADI40480.1  | unknown [Hyposoter didymator]                      | Hd_U17      | 82        | 1,00E-14      | 31/66(47%)                                                       |
| scaffold_6122               | Cs_IVSPER-1   | 31594 | 122689-154282   | p12L-1     | 137295-137555 + strand   | no | 86   | AAD01200.1  | p12 [Campoletis sonorensis ichnovirus]             |             | 92        | 8,00E-17      | 43/92(47%)                                                       |
| scaffold_6122               | Cs_IVSPER-1   | 31594 | 122689-154282   | U19L       | 139263-141209 + strand   | no | 648  | ADI40483.1  | unknown [Hyposoter didymator]                      | Hd_U19      | 660       | 0.0           | 480/649(74%)                                                     |
| scaffold_6122               | Cs_IVSPER-1   | 31594 | 122689-154282   | IVSP4L-1   | 141938-143242 - strand   | no | 434  | ADI40484.1  | unknown [Hyposoter didymator]                      | Hd_IVSP4-2  | 431       | 5,00E-175     | 232/434(53%)                                                     |
| scaffold_6122               | Cs_IVSPER-1   | 31594 | 122689-154282   | U22L       | 143868-144761 - strand   | no | 297  | ADI40487.1  | unknown [Hyposoter didymator]                      | Hd_U22      | 257       | 4,00E-59      | 95/249(38%)                                                      |
| scaffold_6122               | Cs_IVSPER-1   | 31594 | 122689-154282   | U23L       | 146427-147608 - strand   | no | 393  | ADI40488.1  | unknown [Hyposoter didymator]                      | Hd_U23      | 415       | 2,00E-170     | 245/389(63%)                                                     |
| scaffold_6122               | Cs_IVSPER-1   | 31594 | 122689-154282   | p53L-1     | 148451-149548 + strand   | no | 365  | AAD01199.1  | p53 [Campoletis sonorensis ichnovirus]             |             | 364       | 0.0           | 306/365(84%)                                                     |
| scaffold_6122               | Cs_IVSPER-1   | 31594 | 122689-154282   | U24L       | 150683-152365 + strand   | no | 560  | ADI40490.1  | unknown [Hyposoter didymator]                      | Hd_U24      | 563       | 0.0           | 387/558(69%)                                                     |
| scaffold_6122               | Cs_IVSPER-1   | 31594 | 122689-154282   | CsN-1      | 152861-154282 + strand   | no | 473  | ADI40491.1  | unknown [Hyposoter didymator]                      | Hd_N-2      | 492       | 0.0           | 307/491(63%)                                                     |
| scaffold_28                 | Cs_IVSPER-2   | 33269 | 7310-40578      | U6L        | 10522-11574 + strand     | no | 350  | ADI40462.1  | unknown [Hyposoter didymator]                      | Hd_U6       | 349       | 0.0           | 297/350(85%)                                                     |
| scaffold_28                 | Cs_IVSPER-2   | 33269 | 7310-40578      | U7L        | 13049-13684 + strand     | no | 211  | ADI40463.1  | unknown [Hyposoter didymator]                      | Hd_U7       | 212       | 5,00E-61      | 119/211(56%)                                                     |
| scaffold_28                 | Cs_IVSPER-2   | 33269 | 7310-40578      | IVSP1L-2   | 13781-14701 - strand     | no | 306  | ADI40464    | unknown [Hyposoter didymator]                      | Hd_IVSP1-2  | 196       | 9,00E-58      | 93/195(48%)                                                      |
| scaffold_28                 | Cs_IVSPER-2   | 33269 | 7310-40578      | IVSP3L     | 15113-17002 + strand     | no | 629  | ADI40465.1  | unknown [Hyposoter didymator]                      | Hd_IVSP3-1  | 630       | 0.0           | 423/628(67%)                                                     |
| scaffold_28                 | Cs_IVSPER-2   | 33269 | 7310-40578      | U31L-2     | 17484-18179 - strand     | no | 231  | AKD28063.1  | hypothetical protein [Glypta fumiferanae]          | Gf_L 370    | 0.029     | 40/136(29%)   |                                                                  |
| scaffold_28                 | Cs_IVSPER-2   | 33269 | 7310-40578      | U8L        | 18541-18768 - strand     | no | 75   | ADI40466.1  | unknown [Hyposoter didymator]                      | Hd_U8       | 77        | 4,00E-14      | 36/75(48%)                                                       |
| scaffold_28                 | Cs_IVSPER-2   | 33269 | 7310-40578      | U9L        | 19075-19890 - strand     | no | 271  | ADI40467.1  | unknown [Hyposoter didymator]                      | Hd_U9       | 274       | 2,00E-112     | 170/269(63%)                                                     |
| scaffold_28                 | Cs_IVSPER-2   | 33269 | 7310-40578      | U16L       | 20258-22096 - strand     | no | 612  | ADI40479.1  | unknown [Hyposoter didymator]                      | Hd_U16      | 612       | 0.0           | 491/605(81%)                                                     |
| scaffold_28                 | Cs_IVSPER-2   | 33269 | 7310-40578      | U10L       | 22789-27768 + strand     | no | 1344 | ADI40468.1  | unknown [Hyposoter didymator]                      | Hd_U10      | 1355      | 0.0           | 1035/1353(76%) partial?                                          |

|             |                   |            |          |                      |    |     |            |                                                    |     |           |              |                       |
|-------------|-------------------|------------|----------|----------------------|----|-----|------------|----------------------------------------------------|-----|-----------|--------------|-----------------------|
| scaffold_28 | Cs_IVSPER-2 33269 | 7310-40578 | U11L     | 27768-28709 + strand | no | 313 | ADI40469.1 | unknown [Hyposoter didymator] Hd_U11               | 316 | 3,00E-180 | 244/317(77%) |                       |
| scaffold_28 | Cs_IVSPER-2 33269 | 7310-40578 | U12L     | 29360-29971 - strand | no | 203 | ADI40470.1 | unknown [Hyposoter didymator] Hd_U12               | 203 | 1,00E-121 | 168/203(83%) |                       |
| scaffold_28 | Cs_IVSPER-2 33269 | 7310-40578 | U13L     | 30286-30768 + strand | no | 160 | ADI40471.1 | unknown [Hyposoter didymator] Hd_U13               | 152 | 5,00E-29  | 66/160(41%)  |                       |
| scaffold_28 | Cs_IVSPER-2 33269 | 7310-40578 | p12L-2   | 31075-31353 + strand | no | 92  | AA01200.1  | p12 [Campoletis sonorensis ichnovirus]             | 92  | 5,00E-59  | 92/92(100%)  |                       |
| scaffold_28 | Cs_IVSPER-2 33269 | 7310-40578 | U3L      | 32951-33436 + strand | no | 161 | ADI40455.1 | unknown [Hyposoter didymator] Hd_U3                | 162 | 3,00E-67  | 93/155(60%)  | frameshifts, partial? |
| scaffold_28 | Cs_IVSPER-2 33269 | 7310-40578 | IVSP2L-1 | 34504-36036 + strand | no | 510 | ADI40459.1 | unknown [Hyposoter didymator] Hd_IVSP2             | 509 | 0.0       | 325/510(64%) |                       |
| scaffold_28 | Cs_IVSPER-2 33269 | 7310-40578 | U26L     | 36497-37327 + strand | no | 276 | AKD28081.1 | hypothetical protein [Glypta fumiferanae] Gf_L_298 | 298 | 3,00E-29  | 66/165(40%)  |                       |
| scaffold_28 | Cs_IVSPER-2 33269 | 7310-40578 | CsN-2    | 37470-38912 + strand | no | 480 | ADI40491.1 | unknown [Hyposoter didymator] Hd_N-2               | 492 | 0.0       | 323/491(66%) |                       |
| scaffold_28 | Cs_IVSPER-2 33269 | 7310-40578 | U25L     | 39883-40578 - strand | no | 231 | AKD28083.1 | ring finger domain [Glypta fumiferanae] Hd_U_237   | 237 | 2,00E-16  | 41/128(32%)  |                       |
| scaffold_28 | Cs_IVSPER-2 33269 | 7310-40578 | p53L-2   | 7310-8944 + strand   | no | 544 | CAR31590.1 | p53-like 1 protein [Hyposoter didymator]           | 395 | 6,00E-57  | 155/247(62%) |                       |

repeated motifs found within NCBI seq
