# Supplementary material for: Conserved and specific genomic features of endogenous polydnaviruses revealed by whole genome sequencing of two ichneumonid wasps
Source: bioRxiv or medRxiv preprint supplement (doi:10.1101/861310), 2019-12-02
Supplement: Supplementary file [file media-6.pdf]

|              |      |      |                 |             |     |                 |                                                                                                                                                                                                         |     |
|--------------|------|------|-----------------|-------------|-----|-----------------|---------------------------------------------------------------------------------------------------------------------------------------------------------------------------------------------------------|-----|
| scaffold_10  | CsD  | 8168 | 961052-969219   | CsD_DRJ1L   | 711 | 961052-961762   | GAAAAGTTTTGGGAGAGTTGGCTGTGAAGTTGCGAGTTGAACTCAGTTTCTCCCATGTCAAACTACGTTGAATGAAATGAGTTGAGCTTAGACGACGTTCCGACAAAGCCCGAGAGCTCAGAGAAGATTGTCAACGAGCATCCAGCAGAGCTGAGTGAAGCTAGCAGCAAGTTCTGTCGGCTACGAGATGAGTGTGCGA | 98% |
| scaffold_10  | CsD  | 8168 | 961052-969219   | CsD_DRJ1R   | 711 | 968509-969219   | GAAAAGTTTTGGGAGAGTTGGCTGTGAAGTTGCGAGTTGAACTCAGTTTATCCCATGTCAAACTACGTTGAATGAAATGAGTTGAGCTTAGACGACGTTCCGACAAAGCCCGAGAGCTCAGAGAAGATTGTCAACGAGCATCCAGCAGAGCTGAGTGAAGCTAGCAGCAAGTTCTGTCGGCTACGAGATGAGTGTGCGA |     |
| scaffold_14  | CsG2 | 8338 | 192247-200584   | CsG2_DRJ1L  | 173 | 192247-192419   | GATCGAGCGGACGATCTTTTCATCAACGAGTGACAATCGTCAACCAGCCCGGCCGATTGTAGAATGAAAGAGCGATTGATAACCTCTTGGTTGACAAACAG                                                                                                   | 74% |
| scaffold_14  | CsG2 | 8338 | 192247-200584   | CsG2_DRJ1R  | 173 | 200412-200584   | GATCGAGCGGACGATCTTTTCATCAACGAGTGACAATCGTCAACCAGCCCGGCCGATTGTAGAATGAAAGAGCGATTGATAACCTCTTGGTTGACAAACAG                                                                                                   |     |
| scaffold_14  | CsG  | 8656 | 76017-84672     | CsG_DRJ1L   | 372 | 76017-76388     | ACAGCAATTTGACATTTGAAATGTTTTCTCCGCGAGTTGAGTAAAGAGCGTGAAGATAATTTCTGTTATCTAGCTCTCAGTTTTCACAATTTGATCCCATGATC                                                                                                | 97% |
| scaffold_14  | CsG  | 8656 | 76017-84672     | CsG_DRJ1R   | 372 | 84301-84672     | ACAGCAATTTGACATTTGAAATGTTTTCTCCGCGAGTTGAGTAAAGAGCGTGAAGATAATTTCTGTTATCTAGCTCTCAGTTTTCACAATTTGATCCCATGATC                                                                                                |     |
| scaffold_22  | CsI  | 8779 | 695663-704441   | CsI_DRJ1L   | 204 | 695663-695866   | GACATCTCTACAGAGACATCTCACCACCAATCCAGTCGACGATCCAGCATCCAGCTCGAGGATTCCGATCTCTTGTGAGTTGCGGTTGATGATTAGATTAGTAGATG                                                                                             | 84% |
| scaffold_22  | CsI  | 8779 | 695663-704441   | CsI_DRJ1R   | 202 | 704240-704441   | GAAATCTTACACCGCAGCATCTCACCAGTCCAGTCAAGCAATCCCAACCCAAAGGATTCCAATCTCTTGTGAGTTTCAATTTGGTTGATTGGATGGTAGAGG                                                                                                  |     |
| scaffold_128 | CsI2 | 9042 | 110016-119057   | CsI2_DRJ1L  | 174 | 110016-110189   | CGCTGAAACCGCTTTTAACTGCGAACGAACTAAGACAGTTGACACTGAACCAAGAAATCGTGGCTCAGCGACTACCTAATCTTCAATGATAATCAACCA                                                                                                     | 75% |
| scaffold_128 | CsI2 | 9042 | 110016-119057   | CsI2_DRJ1R  | 177 | 118881-119057   | CGCTGATAAAGACATTCAGTTTATTCGGCAACCACTCCTCGAGTGGGCTCAGCGGCAAGTGGCTCAGCGATTCTCAACCTTAAATGCAATCTCACT                                                                                                        |     |
| scaffold_38  | CsH  | 9050 | 1398066-1407115 | CsH_DRJ1L   | 731 | 1398066-1398796 | GCAAAATGTTCAAGTGCATAGCCTACCTCGTGTGGACGGTGACGAAGTTGTAACACCGTGCTATCATTGAGCGAAGCGGCTTTCGCATTTTAAATTTATTTCC                                                                                                 | 98% |
| scaffold_38  | CsH  | 9050 | 1398066-1407115 | CsH_DRJ1R   | 731 | 1406385-1407115 | GCAAAATGTTCAAGTGCATAGCCTACCTCGTGTGGACGGTGACGAAGTTGTAACACCGTGCTATCATTGAGCGAAGCGGCTTTCGCATTTTAAATTTATTTCC                                                                                                 |     |
| scaffold_16  | CsX6 | 9213 | 504600-513812   | CsX6_DRJ1L  | 234 | 504600-504833   | TAATAGATTCTTACTTGGTTGTGAGAAAGCTGACCCTGACGTTTGTGTTATTCATATTTCATCAAACTTAAATGCTTGGCTTATTAAATTTCTCACGGTTGAAA                                                                                                | 89% |
| scaffold_16  | CsX6 | 9213 | 504600-513812   | CsX6_DRJ1R  | 231 | 513582-513812   | TAATACATGCTTACTTTGTTCTGTGAAAACCTACGTTGGAGTGGTGGTATCATCTGACCAAACTAATAGCTTGGCTTATTAAATTTCTCACGGTTGAAA                                                                                                     |     |
| scaffold_15  | CsJ  | 9484 | 2621922-2631405 | CsJ_DRJ1L   | 342 | 2621922-2622263 | TCCTGCGAAATCCACAGCAAGACTCCGTCACCGCTCCATCGTCGGCCAGCGTCTGACATGCTGAGCAGTTGAAAAGTTCTGCAGAAATGACGCGTTAC                                                                                                      | 75% |
| scaffold_15  | CsJ  | 9484 | 2621922-2631405 | CsJ_DRJ1int | 246 | 2628392-2628637 | TTGACATTAACAATTTGAAACGTCCTATGGACCTAACGCTGTTGGTGGATCATGTATGCGGGTCGAAAAGCTTTGACGAGCATTGACTGGGCTCAGTTATG                                                                                                   |     |
| scaffold_15  | CsJ  | 9484 | 2621922-2631405 | CsJ_DRJ1R   | 341 | 2631065-2631405 | TCTCTGCGAATCCACATCAAGACTACTCTGCTACATCTGACCAACACTGTGTTGAACTCAGTAACTAGTTGAAAGCTTCGACGAAAGTACCAGGCTTACACG                                                                                                  |     |
| scaffold_35  | CsX8 | 9999 | 164467-174465   | CsX8_DRJ1L  | 249 | 164467-164715   | TTGGTACGTTGCTTAAAGTCAGCATCTCTTGTGTGTGTGACGTTGTTTCATCTTCACTTCAAACTAAACATCAATTTCTCTCTGCTTGTGCTGCTTGTGCGATGCGG                                                                                             | 80% |
| scaffold_35  | CsX8 | 9999 | 164467-174465   | CsX8_DRJ1R  | 252 | 174214-174465   | TTGGTACGTTGCTTAAAGTCAGCATCTCTTGTGTGTGTGACGTTGTTTCATCTTCACTTCAAACTAAACATCAATTTCTCTCTGCTTGTGCTGCTTGTGCGATGCGG                                                                                             |     |

|     |
|-----|
| 91% |
| 73% |
