# Supplementary material for: Conserved and specific genomic features of endogenous polydnaviruses revealed by whole genome sequencing of two ichneumonid wasps
Source: bioRxiv or medRxiv preprint supplement (doi:10.1101/861310), 2019-12-02
Supplement: Supplementary file [file media-7.pdf]

### Additional File 7. DRJ analysis

**A.** DNA motifs found in the direct repeated sequences flanking the IV segments inserted in wasp genomes. Analysis was performed using the DNAMINDA2 webserver (<http://bmbi.sdstate.edu/DMINDA2/annotate.php>); the input dataset was composed of 99 DRJ sequences (right junctions of HdIV and CsIV segments). A total of 89 motifs were obtained; only those whose occurrence exceed 70% of the DRJs are reported.

| Motif    | Length (nt) | Consensus logo                                                                      | Consensus sequence | Nb of occurrence in DRJs (n=99 DRJ sequences) | Nb of DRJs containing at least one motif (/99) |
|----------|-------------|-------------------------------------------------------------------------------------|--------------------|-----------------------------------------------|------------------------------------------------|
| Motif-62 | 6           |    | TGAYGA             | 1231                                          | 97                                             |
| Motif-56 | 6           |    | CAAGAA             | 638                                           | 97                                             |
| Motif-58 | 6           |    | TGCAAT             | 380                                           | 90                                             |
| Motif-68 | 7           |   | AATGTTG            | 281                                           | 82                                             |
| Motif-88 | 9           |  | GTTGTCATY          | 205                                           | 76                                             |
| Motif-10 | 8           |  | CAATMATG           | 197                                           | 75                                             |
| Motif-59 | 6           |  | AATGCA             | 195                                           | 73                                             |

### **B. Result of genome search using motifs predicted with DMINDA 2.0 webserver**

Occurrence rate of the motif in DRJ and whole genome sequences. Each motif was search among the 6 bp kmers present in the whole genome (201,969,604) and in the DRJs (33,930). The significance was evaluated using a Chi2 (taking into account the ratio of these motifs / all the other motifs in the DRJS and in the genome).

| Motif          | DRJ | Whole genome | P-value |
|----------------|-----|--------------|---------|
| TC[G,A]T<br>CA | 61  | 291,908      | 0.1015  |
| CAAGAA         | 31  | 169,153      | 0.6959  |

### C. Manual analysis of the regions containing an excision site

A CLUSTAL O(1.2.4) multiple sequence alignment was performed on the DRJs. The sequences used for alignment have 3 different origins: (i) DRJs from *H. didymator* genome; (ii) DRJs from *H. didymator* BAC clones; (iii) HdIV segments, e.g. PCR products (cloned in pGEM and Sanger sequenced) from encapsidated HdIV DNA template.

Color code:

DRJ1R (or right junction) underlined in dark grey; DRJ1L (or left junction) underlined in light grey  
Nucleotides that differ between DRJ1R and DRJ1L are indicated in red (in blue, differences between genome and BAC sequences)

Regions in the segment sequence where potentially occurred a switch between right/left junctions are underlined.

#### Segment Hd30

Sequences used for alignment:

(i) DRJs from genome: Hd30\_DRJ1R, Hd30\_DRJ1L

(ii) DRJs from BAC clone # AB-06P08: right\_AB, left\_AB

(iii) HdIV segments: Contig\_AB-20, Contig\_AB-17, Contig\_AB-16; plus sequence SH\_AB previously sequenced

#### Alignment

|              |                                                                                                                                                            |
|--------------|------------------------------------------------------------------------------------------------------------------------------------------------------------|
| left_AB      | AGCCGACGTGATATATGCTGAAACAGGCTCGACTCGCTACGAGGCTAGTTGGTTGGTCC                                                                                                |
| Hd30_DRJ1L   | AGCCGACGTGATATATGCTGAAACAGGCTCGACTCGCTACGAGGCTAGTTGGTTGGTCC                                                                                                |
| Contig_AB-17 | AGTCAACATGGTGTATGTTTCAGACCAAGTCTCCCTCGCTACGAGGCTAGTTGGTTGGTCC                                                                                              |
| Contig_AB-20 | AGTCAACATGGTGTATGTTTCAGACCAAGTCTCCCTCGCTACGAGGCTAGTTGGTTGGTCC                                                                                              |
| SH_AB        | AGTCAACATGGTGTATGTTTCAGACCAAGTCTCCCTCGCTACGAGGCTAGTTGGTTGGTCC                                                                                              |
| Contig_AB-16 | AGTCAACATGGTGTATGTTTCAGACCAAGTCTCCCTCGCTACGAGGCTAGTTGGTTGGTCC                                                                                              |
| right_AB     | AGTCAACATGGTGTATGTTTCAGACCAAGTCTCCCTCGCTACGAGGCTAGTTGGTTGGTCC                                                                                              |
| Hd30_DRJ1R   | AGTCAACATGGTGTATGTTTCAGACCAAGTCTCCCTCGCTACGAGGCTAGTTGGTTGGTCC<br>** * ** * * * * * * * * * * * * * * * * * * * * * * * * * * * * * * * * * * * * * * * * * |

|              |                                                                                                                                                |
|--------------|------------------------------------------------------------------------------------------------------------------------------------------------|
| left_AB      | ATCAGTGCATTGCACGCTCGCTACGGGTTGGCACCAGCAGCATCGTGCACACTGCGCAACTC                                                                                 |
| Hd30_DRJ1L   | ATCAGTGCATTGCACGCTCGCTACGGGTTGGCACCAGCAGCATCGTGCACACTGCGCAACTC                                                                                 |
| Contig_AB-17 | ATCAGTGCATTGCACGCTCGCTACGGGTTGGCACCAGCAGCATCGTGCACACTGCGCAACTC                                                                                 |
| Contig_AB-20 | ATCCGTGCATTGCACGCTCGCTGCGGGTTGGCACCAGCAGCATCGTGCACACTACTGCGACTC                                                                                |
| SH_AB        | ATCCGTGCATTGCACGCTCGCTGCGGGTTGGCACCAGCAGCATCGTGCACACTACTGCGACTC                                                                                |
| Contig_AB-16 | ATCCGTGCATTGCACGCTCGCTGCGGGTTGGCACCAGCAGCATCGTGCACACTACTGCGACTC                                                                                |
| right_AB     | ATCCGTGCATTGCACGCTCGCTGCGGGTTGGCACCAGCAGCATCGTGCACACTACTGCGACTC                                                                                |
| Hd30_DRJ1R   | ATCCGTGCATTGCACGCTCGCTGCGGGTTGGCACCAGCAGCATCGTGCACACTACTGCGACTC<br>*** ***** * * * * * * * * * * * * * * * * * * * * * * * * * * * * * * * * * |

|              |                                                                                                                                               |
|--------------|-----------------------------------------------------------------------------------------------------------------------------------------------|
| left_AB      | CAGCACCTTACAACCTGCAGCGATAATACACTTCGTGCTGTGGAGCACGGTGTCAACGGTGTTC                                                                              |
| Hd30_DRJ1L   | CAGCACCTTACAACCTGCAGCGATAATACACTTCGTGCTGTGGAGCACGGTGTCAACGGTGTTC                                                                              |
| Contig_AB-17 | CAACACCTTACAACCTGCAGCGATAATACACTTCGTGCTGTGGAGCACGGTGTCAACGGTGTTC                                                                              |
| Contig_AB-20 | CGGCACCTTACGAGCTGCAGCGATAAGACACTTCGTGCTGTGGAGCACGGTGTCAACGGTGTTC                                                                              |
| SH_AB        | CGGCACCTTACGAGCTGCAGCGATAAGACACTTCGTGCTGTGGAGCACGGTGTCAACGGTGTTC                                                                              |
| Contig_AB-16 | CGGCACCTTACAACCTGCAGCGATAATACACTTCGTGCTGTGGAGCACGGTGTCAACGGTGTTC                                                                              |
| right_AB     | CGGCACCTTACGAGCTGCAGCGATAAGACACTTCGTGCTGTGGAGCACGGTGTCAACGGTGTTC                                                                              |
| Hd30_DRJ1R   | CGGCACCTTACGAGCTGCAGCGATAAGACACTTCGTGCTGTGGAGCACGGTGTCAACGGTGTTC<br>* ***** * * * * * * * * * * * * * * * * * * * * * * * * * * * * * * * * * |

#### Segment Hd12

Sequences used for alignment:

(i) DRJs from genome: Hd12\_DRJ1R, Hd12\_DRJ1L

(ii) DRJs from BAC clone # BG-42L09+BL-56G14): left\_jct\_BGBL1, right\_jct\_BGBL1

(iii) HdIV segments: Contig\_BGBL1-11, Contig\_BGBL1-16, Contig\_BGBL1-19

## Alignment

```

left_jct_BGBL1      --AGTACGGTAATGCGGCCAGTCTTTGGCGTTATACTGTTTGGCGCTTATCTGGAGTTG
Hd12_DRJ1L         ATAGTACGATAATGCGGCCAGTCTTTGGCGTACTACTGTTTACGGCTTATCTGCAGTTG
Contig_BGBL1-19    --AGAACGCTTATCACCACCAATCTTTGGCGTCATACTGTTTGGCGCTTATCTGCAGTTG
Contig_BGBL1-11    --AGAACGCTTATCACCACCAATCTTTGGCGTCATACTGTTTGGCGCTTATCTGCAGTTG
Contig_BGBL1-16    --AGAACGCTTATCACCACCAATCTTTGGCGTCATACTGTTTGGCGCTTATCTGCAGTTG
right_jct_BGBL1    --AGAACGCTTATCACCACCAATCTTTGGCGTCATACTGTTTGGCGCTTATCTGCAGTTG
Hd12_DRJ1R         ATAGAACGCTTATCACCACCAATCTTTGGCGTCATACTGTTTGGCGCTTATCTGCAGTTG
                    ** ** * * * * * ** * * * * * * * * * * * * * * * * * * * * * * * * * * * * *
  
```

```

left_jct_BGBL1      TCACTCATGGTCAAGTTAAGAAAACCTCATTTAGATGTCTCATATTCCTGTATGGTCT
Hd12_DRJ1L         TCACTCATGAGTCAAGTTAAGAAAACCTCATTTAGATGTCTCATATTCCTGTATGGTCT
Contig_BGBL1-19    GTACTTATGGATCAAGTTGAGGAAAACCTTATCCAGGCGTCTCATACCCTTGTATGGTCT
Contig_BGBL1-11    GTACTTATGGATCAAGTTGAGGAAAACCTTATCCAGGCGTCTCATACCCTTGTATGGTCT
Contig_BGBL1-16    GTACTTATGGATCAAGTTGAGGAAAACCTTATCCAGGCGTCTCATACCCTTGTATGGTCT
right_jct_BGBL1    GTACTTATGGATCAAGTTGAGGAAAACCTTATCCAGGCGTCTCATACCCTTGTATGGTCT
Hd12_DRJ1R         GTACTTATGGATCAAGTTGAGGAAAACCTTATCCAGGCGTCTCATACCCTTGTATGGTCT
                    ** ** * * * * * * * * * * * * * * * * * * * * * * * * * * * * *
  
```

```

left_jct_BGBL1      GCTCCGTACCTAAACGTCGCGGGTACACGTACTCAGAAAGGAATGCACACCCAGGCCTTG
Hd12_DRJ1L         GCTCCGTACCTAAACGTCGCGGGTACACGTACTCAGAAAGGAATGCACACCCAGGCCTTG
Contig_BGBL1-19    GCTCCGTACCTAAACGTCGCGGGTACACGTACTCAGAAAGGAATGCACACCCAGGCCTTG
Contig_BGBL1-11    GCTCCGTACCTAAACGTCGCGGGTACACGTACTCAGAAAGGAATGCACACCCAGGCCTTG
Contig_BGBL1-16    GCTCCGTACCTAAACGTCGCGGGTACACGTACTCAGAAAGGAATGCACACCCAGGCCTTG
right_jct_BGBL1    GCTCCGTAACCTAAACGTCGCGGGTACACGTACTCAGAAAGGAATGCACACCCAGGCCTTA
Hd12_DRJ1R         GCTCCGTAACTAAACGTCGCGGGTACACGTACTCAGAAAGGAATGCACACCCAGGCCTTA
                    ***** ** * * * * * * * * * * * * * * * * * * * * * * * * * * * * *
  
```

```

left_jct_BGBL1      CTCAAGACATATGATGAGCATATTCGTAAGCATAGTTTGCAGATATACAACGGAGCTTTGC
Hd12_DRJ1L         CTCAAGACATATGATGAGCATATTCGTAAGCATAGTTTGCAGATATACAACGGAGCTTTGC
Contig_BGBL1-19    CTCAAGACATATGATGAGCATATTCGTAAGCATAGTTTGCAGATATACAACGGAGCTTTGC
Contig_BGBL1-11    CTCAAGACATATGATGAGCATATTCGTAAGCATAGTTTGCAGATATACAACGGAGCTTTGC
Contig_BGBL1-16    CTCAAGACATATGATGAGCATATTCGTAAGCATAGTTTGCAGATATACAACGGAGCTTTGC
right_jct_BGBL1    CTCAAGACATATGATGAGCATATTCGTAAGCATAGTTTGCAGATATACAACGGAGCTTTGC
Hd12_DRJ1R         CTCAAGACATATGATGAGCATATTCGTAAGCATAGTTTGCAGATATACAACGGAGCTTTGC
                    **** * * * * * * * * * * * * * * * * * * * * * * * * * * * * *
  
```

```

left_jct_BGBL1      ATCCCATGTGCACATAACCATCAGAGATGAACGGGGAGATCTCCAATGCTATAAGGCC
Hd12_DRJ1L         ATCCCATGTGCACATAACCATCAGAGATGAACGGGGAGATCTCCAATGCTATAAGGCC
Contig_BGBL1-19    ATCCCATGTGCACATAACCATCAGAGATGAACGGGGAGATCTCCAATGCTATAAGGCC
Contig_BGBL1-11    ATCCCATGTGCACATAACCATCAGAGATGAACGGGGAGATCTCCAATGCTATAAGGCC
Contig_BGBL1-16    ATTTTCATGTGCACATAACCATCAGAGATGAACGGGGAGATCTCCAATGCTATAAGGCC
right_jct_BGBL1    ATCCCATGTGCACATAACCATCAGAGATGAACGGGGAGATCTCCAATGCTATAAGGCC
Hd12_DRJ1R         ATCCCATGTGCACATAACCATCAGAGATGAACGGGGAGATCTCCAATGCTATAAGGCC
                    ** * * * * * * * * * * * * * * * * * * * * * * * * * * * * *
  
```

```

left_jct_BGBL1      CTAGTGGTTCCTACAAAGCGACGGTTTTACGTATCGGTCAACTGCTCCAGCTGTCATAGG
Hd12_DRJ1L         CTAGTGGTTCCTACAAAGCGACGGTTTTACGTATCGGTCAACTGCTCCAGCTGTCATAGG
Contig_BGBL1-19    CTAGTGGTTCCTACAAAGCGACGGTTTTACGTATCGGTCAACTGCTCCAGCTGTCATAGG
Contig_BGBL1-11    CTAGTGGTTCCTACAAAGCGACGGTTTTACGTATCGGTCAACTGCTCCAGCTGTCATAGG
Contig_BGBL1-16    CTAGTGGTTCCTACAAAGCGACGGTTTTACGTATCGGTCAACTGCTCCAGCTGTCATAGG
right_jct_BGBL1    CGAGTGGTTCCTACAGAGCGCGCTTTTCTTATCGGTCAACTAATAAAGCTGCTTAGA
Hd12_DRJ1R         CGAGTGGTTCCTACAGAGCGCGCTTTTCTTATCGGTCAACTAATAAAGCTGCTTAGA
                    * * * * * * * * * * * * * * * * * * * * * * * * * * * * *
  
```

```

left_jct_BGBL1      TGTGTTGTTGTTGCTCGGTGCTGCTTGCAAGTAATCCATCCTGCTCGGCAGAGA
Hd12_DRJ1L         TGTGTTGTTGTTGCTCGGTGCTGCTTGCAAGTAATCCATCCTGCTCGGCAGAGA
Contig_BGBL1-19    TGTGTTGTTGTTGCTCGGTGCTGCTTGCAAGTAATCCATCCTGCTCGGCAGAGA
Contig_BGBL1-11    TGTGTTGTTGTTGCTCGGTGCTGCTTGCAAGTAATCCATCCTGCTCGGCAGAGA
Contig_BGBL1-16    TGTGTTGTTGTTGCTCGGTGCTGCTTGCAAGTAATCCATCCTGCTCGGCAGAGA
right_jct_BGBL1    TGTGTTT--TTGCTCGGTGCTGCTCGCACAAATCCATCCTGCTCGGCAGAGA
Hd12_DRJ1R         TGTGTTT--TTGCTCGGTGCTGCTCGCACAAATCCATCCTGCTCGGCAGAGA
                    ***** * * * * * * * * * * * * * * * * * * * * * * *
  
```

## Segment Hd16

Sequences used for alignment:

- (i) DRJs from genome: Hd16\_DRJ1R, Hd16\_DRJ1L
- (ii) DRJs from BAC clone # BG-42L09+BL-56G14: left\_jct\_BGBL2, right\_jct\_BGBL2
- (iii) HdIV segments: Contig\_BGBL2-12, Contig\_BGBL2-16, Contig\_BGBL2-19, SH\_BGBL2

# Alignment

```
left_jct_BGBL2 -----
Hd16_DRJ1L -----
Contig_BGBL2-19 ATAGAGTTGTCATGAGCGTAACTACATTTAAACTTGAAGCACTGTAAGAAGGAACGGTCT
Contig_BGBL2-12 ATAGAGTTGTCATGAGCGTAACTACATTTAAACTTGAAGCACTGTAAGAAGGAACGGTCT
Contig_BGBL2-16 ATAGAGTTGTCATGAGCGTAACTACATTTAAACTTGAAGCACTGTAAGAAGGAACGGTCT
SH_BGBL2 ATAGAGTTGTCATGAGCGTAACTACATTTAAACTTGAAGCACTGTAAGAAGGAACGGTCT
right_jct_BGBL2 ATAGAGTTGTCATGAGCGTAACTACATTTAAACTTGAAGCACTGTAAGAAGGAACGGTCT
Hd16_DRJ1R -----TTGTCATGAGCGTAACTACATTTAAACTTGAAGCACTGTAAGAAGGAACGGTCT
```

```
left_jct_BGBL2 -----ATAAAATTGTCATGAGAG-----GAACTAA
Hd16_DRJ1L -----TTGTCATGAGAG-----GAACTAA
Contig_BGBL2-19 CACAGTACCTTACCTACACAAGTCTCCATCATCTTACACTAATAAGGATAAGAAAAATAA
Contig_BGBL2-12 CACAGTACCTTACCTACACAAGTCTCCATCATCTTACACTAATAAGGATAAGAAAAATAA
Contig_BGBL2-16 CACAGTACCTTACCTACACAAGTCTCCATCATCTTACACTAATAAGGATAAGAAAAATAA
SH_BGBL2 CACAGTACCTTACCTACACAAGTCTCCATCATCTTACACTAATAAGGATAAGAAAAATAA
right_jct_BGBL2 CACAGTACCTTACCTACACAAGTCTCCATCATCTTACACTAATAAGGATAAGAAAAATAA
Hd16_DRJ1R CACAGTACCTTACCTACACAAGTCTCCATCATCTTACACTAATAAGGATAAGAAAAATAA
* * * * * * * * * *
```

```
left_jct_BGBL2 ATTTAAACTTGTACCAACGTAAGAGG-----AAACGCTCTCACAGTACC-TTTAGCTGC
Hd16_DRJ1L ATTTAAACTTGTACCAACGTAAGAGG-----AAACGCTCTCACAGTACC-TTTAGCTGC
Contig_BGBL2-19 AAGTAAACACATTCACACAAAACCTTTTATTTCAATCTAAGGAACAGTATATGCTGCACTA
Contig_BGBL2-12 AAGTAAACACATTCACACAAAACCTTTTATTTCAATCTAAGGAACAGTATATGCTGCACTA
Contig_BGBL2-16 AAGTAAACACATTCACACAAAACCTTTTATTTCAATCTAAGGAACAGTATATGCTGCACTA
SH_BGBL2 AAGTAAACACATTCACACAAAACCTTTTATTTCAATCTAAGGAACAGTATATGCTGCACTA
right_jct_BGBL2 AAGTAAACACATTCACACAAAACCTTTTATTTCAATCTAAGGAACAGTATATGCTGCACTA
Hd16_DRJ1R AAGTAAACACATTCACACAAAACCTTTTATTTCAATCTAAGGAACAGTATATGCTGCACTA
* * * * * * * * * *
```

```
left_jct_BGBL2 AAGCTTTAGATTAGATTCAACTGCACCATGGCCGGAACGTGTTGCGAGCCGAGTCAAGCAA
Hd16_DRJ1L AAGCTTTAGATTAGATTCAACTGCACCATGGCCGGAACGTGTTGCGAGCCGAGTCAAGCAA
Contig_BGBL2-19 TTAACACTACTCAGATTAAGCTGCACCATGGCCGGAACGTGTTGCGAGCCGAGTCAAGCAA
Contig_BGBL2-12 TTAACACTACTCAGATTAAGCTGCACCATGGCCGGAACGTGTTGCGAGCCGAGTCAAGCAA
Contig_BGBL2-16 TTAACACTACTCAGATTAAGCTGCACCATGGCCGGAACGTGTTGCGAGCCGAGTCAAGCAA
SH_BGBL2 TTAACACTACTCAGATTAAGCTGCACCATGGCCGGAACGTGTTGCGAGCCGAGTCAAGCAA
right_jct_BGBL2 TTAACACTACTCAGATTAAGCTGCACCATGGCCGGAACGTGTTGCGAGCCGAGTCAAGCAA
Hd16_DRJ1R TTAACACTACTCAGATTAAGCTGCACCATGGCCGGAACGTGTTGCGAGCCGAGTCAAGCAA
* * * * * * * * * *
```

```
left_jct_BGBL2 CACTTCTGTGTCCGTACGTTACGCCATAGAATAATATTCCAAGACGTCTGGATTGTTTTG
Hd16_DRJ1L CACTTCTGTGTCCGTACGTTACGCCATAGAATAATATTCCAAGACGTCTGGATTGTTTTG
Contig_BGBL2-19 CACTTCTGTGTCCGTACGTTACGCCATAGAATAATATTCCAAGACGTCTGGATTGTTTTG
Contig_BGBL2-12 CACTTCTGTGTCCGTACGTTACGCCATAGAATAATATTCCAAGACGTCTGGATTGTTTTG
Contig_BGBL2-16 CACTTCTGTGTCCGTACGTTACGCCATAGAATAATATTCCAAGACGTCTGGATTGTTTTG
SH_BGBL2 CACTTCTGTGTCCGTACGTTACGCCATAGAATAATATTCCAAGACGTCTGGATTGTTTTG
right_jct_BGBL2 CACTTCTGTGTCCGTACGTTACGCCATAGAATAATATTCCAAGACGTCTGGATTGTTTTG
Hd16_DRJ1R CACTTCTGTGTCCGTACGTTACGCCATAGAATAATATTCCAAGACGTCTGGATTGTTTTG
*****
```

```
left_jct_BGBL2 ATGCACATTTGCAATGATCTCAGTGAACATCTCTTTAGATTCTTTAAGAAGAATCGCGGG
Hd16_DRJ1L ATGCACATTTGCAATGATCTCAGTGAACATCTCTTTAGATTCTTTAAGAAGAATCGCGGG
Contig_BGBL2-19 ATGCACATTTGCAATGATCTCAGTGAACATCTCTTTAGATTCTTTAAGAAGAATCGCGGG
Contig_BGBL2-12 ATGCACATTTGCAATGATCTCAGTGAACATCTCTTTAGATTCTTTAAGAAGAATCGCGGG
Contig_BGBL2-16 ATGCACATTTGCAATGATCTCAGTGAACATCTCTTTAGATTCTTTAAGAAGAATCGCGGG
SH_BGBL2 ATGCACATTTGCAATGATCTCAGTGAACATCTCTTTAGATTCTTTAAGAAGAATCGCGGG
right_jct_BGBL2 ATGCACATTTGCAATGATCTCAGTGAACATCTCTTTAGATTCTTTAAGAAGAATCGCGGG
Hd16_DRJ1R ATGCACATTTGCAATGATCTCAGTGAACATCTCTTTAGATTCTTTAAGAAGAATCGCGGG
*****
```

```
left_jct_BGBL2 GATCATATATTTAGTCAACCATGCGGAGACGTGCGCCGTACAGAAATGATGCCAGTGGAG
Hd16_DRJ1L GATCATATATTTAGTCAACCATGCGGAGACGTGCGCCGTACAGAAATGATGCCAGTGGAG
Contig_BGBL2-19 GATCATATATTTAGTCAACCATGCGGAGACGTGCGCCGTACAGAAATGATGCCAGTGGAG
Contig_BGBL2-12 GATCATATATTTAGTCAACCATGCGGAGACGTGCGCCGTACAGAAATGATGCCAGTGGAG
Contig_BGBL2-16 GATCATATATTTAGTCAACCATGCGGAGACGTGCGCCGTACAGAAATGATGCCAGTGGAG
SH_BGBL2 GATCATATATTTAGTCAACCATGCGGAGACGTGCGCCGTACAGAAATGATGCCAGTGGAG
right_jct_BGBL2 GATCATATATTTAGTCAACCATGCGGAGACGTGCGCCGTACAGAAATGATGCCAGTGGAG
Hd16_DRJ1R GATCATATATTTAGTCAACCATGCGGAGACGTGCGCCGTACAGAAATGATGCCAGTGGAG
*****
```

```
left_jct_BGBL2 TTCGTTCTTACACTCACGTCCAGGTGAAACCACCTTTATGGGTTTTTTCTCGCAGGAGCA
Hd16_DRJ1L TTCGTTCTTACACTCACGTCCAGGTGAAACCACCTTTATGGGTTTTTTCTCGCAGGAGCA
Contig_BGBL2-19 TTCGTTCTTACACTCACGTCCAGGTGAAACCACCTTTATGGGTTTTTTCTCGCAGGAGCA
Contig_BGBL2-12 TTCGTTCTTACACTCACGTCCAGGTGAAACCACCTTTATGGGTTTTTTCTCGCAGGAGCA
```

Contig\_BGBL2-16 TTCGTTCTTGCACTCACGTCCAGGTGAAACCACTTTATTTGGGTTTTTTCTCGCAGGAGCA  
SH\_BGBL2 TTCGTTCTTGCACTCACGTCCAGGTGAAACCACTTTATTTGGGTTTTTTCTCGCAGGAGCA  
right\_jct\_BGBL2 TTCGTTCTTGCACTCACGTCCAGGTGAAACCACTTTATTTGGGTTTTTTCTCGCAGGAGCA  
Hd16\_DRJ1R TTCGTTCTTGCACTCACGTCCAGGTGAAACCACTTTATTTGGGTTTTTTCTCGCAGGAGCA  
\*\*\*\*\*

left\_jct\_BGBL2 GGTGTCGCTGGCGACCGCCTTGCACTTCTGGAAGCGAATCTTCTTCACGAACGTAGTAT  
Hd16\_DRJ1L GGTGTCGCTGGCGACCGCCTTGCACTTCTGGAAGCGAATCTTCTTCACGAACGTAGTAT  
Contig\_BGBL2-19 GGTGTCGCTGGCGACCGCCTTGCACTTCTGGAAGCGAATCTTCTTCACGAACGTAGTAT  
Contig\_BGBL2-12 GGTGTCGCTGGCGACCGCCTTGCACTTCTGGAAGCGAATGTTCTTCACGAACGTAGTAT  
Contig\_BGBL2-16 GGTGTCGCTGGCGACCGCCTTGCACTTCTGGAAGCGAATGTTCTTCACGAACGTAGTAT  
SH\_BGBL2 GGTGTCGCTGGCGACCGCCTTGCACTTCTGGAAGCGAATGTTCTTCACGAACGTAGTAT  
right\_jct\_BGBL2 GGTGTCGCTGGCGACCGCCTTGCACTTCTGGAAGCGAATGTTCTTCACGAACGTAGTAT  
Hd16\_DRJ1R GGTGTCGCTGGCGACCGCCTTGCACTTCTGGAAGCGAATGTTCTTCACGAACGTAGTAT  
\*\*\*\*\*

left\_jct\_BGBL2 TACGGGCAGCCTCACAAAATCTCTCTCACCCGGCGCCGCTCCAAAATAGAGGCATGAG  
Hd16\_DRJ1L TACGGGCAGCCTCACAAAATCTCTCTCACCCGGCGCCGCTCCAAAATAGAGGCATGAG  
Contig\_BGBL2-19 TACGGGCAGCCTCACAAAATCTCTCTCACCCGGCGCCGCTCCAAAATAGAGGCATGAG  
Contig\_BGBL2-12 TACGGGCAGCCTCACAAAATCTCTCTCACCCGGCGCCGCTCCAAAATAGAGGCATGAG  
Contig\_BGBL2-16 TATGGGCAGCCTCACAAAATCTCTCTCACCCGGCGCCGCTCCAAAATAGAGGCATGAG  
SH\_BGBL2 TACGGGCAGCCTCACAAAATCTCTCTCACCCGGCGCCGCTCCAAAATAGAGGCATGAG  
right\_jct\_BGBL2 TACGGGCAGCCTCACAAAATCTCTCTCACCCGGCGCCGCTCCAAAATAGAGGCATGAG  
Hd16\_DRJ1R TACGGGCAGCCTCACAAAATCTCTCTCACCCGGCGCCGCTCCAAAATAGAGGCATGAG  
\*\* \*\*\*\*\*

left\_jct\_BGBL2 CCAGTCCCAATTTATCAGCAGGCGATCTTCTTCTGGCCTTGTTGCATCGAAGCTGTAGCG  
Hd16\_DRJ1L CCAGTCCCAATTTATCAGCAGGCGATCTTCTTCTGGCCTTGTTGCATCGAAGCTGTAGCG  
Contig\_BGBL2-19 CCAGTCCCAATTTATCAGCAGGCGATCTTCTTCTGGCCTTGTTGCATCGAAGCTGTAGCG  
Contig\_BGBL2-12 CCAGTCCCAATTTATCAGCAGGCGATCTTCTTCTGGCCTTGTTGCATCGAAGCTGTAGCG  
Contig\_BGBL2-16 CCAGTCCCAATTTATCAGCAGGCGATCTTCTTCTGGCCTTGTTGCATCGAAGCTGTAGCG  
SH\_BGBL2 CCAGTCCCAATTTATCAGCAGGCGATCTTCTTCTGGCCTTGTTGCATCGAAGCTGTAGCG  
right\_jct\_BGBL2 CCAGTCCCAATTTATCAGCAGGCGATCTTCTTCTGGCCTTGTTGCATCGAAGCTGTAGCG  
Hd16\_DRJ1R CCAGTCCCAATTTATCAGCAGGCGATCTTCTTCTGGCCTTGTTGCATCGAAGCTGTAGCG  
\*\*\*\*\*

left\_jct\_BGBL2 GACGGGGCATGCCTTCCCGTTCAGGAAAGTCAAGTCCAGGTTTCGGATCGATGTAAGAAA  
Hd16\_DRJ1L GACGGGGCATGCCTTCCCGTTCAGGAAAGTCAAGTCCAGGTTTCGGATCGATGTAAGAAA  
Contig\_BGBL2-19 GACGGGGCATGCCTTCCCGTTCAGGAAAGTCAAGTCCAGGTTTCGGATCGATGTAAGAAA  
Contig\_BGBL2-12 GACGGGGCATGCCTTCCCGTTCAGGAAAGTCAAGTCCAGGTTTCGGATCGATGTAAGAAA  
Contig\_BGBL2-16 GACGGGGCATGCCTTCCCGTTCAGGAAAGTCAAGTCCAGGTTTCGGATCGATGTAAGAAA  
SH\_BGBL2 GACGGGGCATGCCTTCCCGTTCAGGAAAGTCAAGTCCAGGTTTCGGATCGATGTAAGAAA  
right\_jct\_BGBL2 GACGGGGCATGCCTTCCCGTTCAGGAAAGTCAAGTCCAGGTTTCGGATCGATGTAAGAAA  
Hd16\_DRJ1R GACGGGGCATGCCTTCCCGTTCAGGAAAGTCAAGTCCAGGTTTCGGATCGATGTAAGAAA  
\*\*\*\*\*

left\_jct\_BGBL2 CTGTTGATATGCTACGTTGAAACGTATAAATTCGATGAAGCTGAAAGGGGCGCCATTCCGG  
Hd16\_DRJ1L CTGTTGATATGCTACGTTGAAACGTATAAATTCGATGAAGCTGAAAGGGGCGCCATTCCGG  
Contig\_BGBL2-19 CTGTTGATATGCTACGTTGAAACGTATAAATTCGATGAAGCTGAAAGGGGCGCCATTCCGG  
Contig\_BGBL2-12 CTGTTGATATGCTACGTTGAAACGTATAAATTCGATGAAGCTGAAAGGGGCGCCATTCCGG  
Contig\_BGBL2-16 CTGTTGATATGCTACGTTGAAACGTATAAATTCGATGAAGCTGAAAGGGGCGCCATTCCGG  
SH\_BGBL2 CTGTTGATATGCTACGTTGAAACGTATAAATTCGATGAAGCTGAAAGGGGCGCCATTCCGG  
right\_jct\_BGBL2 CTGTTGATATGCTACGTTGAAACGTATAAATTCGATGAAGCTGAAAGGGGCGCCATTCCGG  
Hd16\_DRJ1R CTGTTGATATGCTACGTTGAAACGTATAAATTCGATGAAGCTGAAAGGGGCGCCATTCCGG  
\*\*\*\*\*

left\_jct\_BGBL2 CATGGCAGGCCCGCGGAACGTGAAGGTGTCCACCGGGTAAGTATGTGTTCTGTCTGTGATC  
Hd16\_DRJ1L CATGGCAGGCCCGCGGAACGTGAAGGTGTCCACCGGGTAAGTATGTGTTCTGTCTGTGATC  
Contig\_BGBL2-19 CATGGCAGGCCCGCGGAACGTGAAGGTGTCCACCGGGTAAGTATGTGTTCTGTCTGTGATC  
Contig\_BGBL2-12 CATGGCAGGCCCGCGGAACGTGAAGGTGTCCACCGGGTAAGTATGTGTTCTGTCTGTGATC  
Contig\_BGBL2-16 CATGGCAGGCCCGCGGAACGTGAAGGTGTCCACCGGGTAAGTATGTGTTCTGTCTGTGATC  
SH\_BGBL2 CATGGCAGGCCCGCGGAACGTGAAGGTGTCCACCGGGTAAGTATGTGTTCTGTCTGTGATC  
right\_jct\_BGBL2 CATGGCAGGCCCGCGGAACGTGAAGGTGTCCACCGGGTAAGTATGTGTTCTGTCTGTGATC  
Hd16\_DRJ1R CATGGCAGGCCCGCGGAACGTGAAGGTGTCCACCGGGTAAGTATGTGTTCTGTCTGTGATC  
\*\*\*\*\*

left\_jct\_BGBL2 TTCGTTGAACGGCATGTTGAGTCTGGATATCACCTGCGTCTGGACGATGTTCCCTTTGTG  
Hd16\_DRJ1L TTCGTTGAACGGCATGTTGAGTCTGGATATCACCTGCGTCTGGACGATGTTCCCTTTGTG  
Contig\_BGBL2-19 TTCGTTGAACGGCATGTTGAGTCTGGATATCACCTGCGTCTGGACGATGTTCCCTTTGTG  
Contig\_BGBL2-12 TTCGTTGAACGGCATGTTGAGTCTGGATATCACCTGCGTCTGGACGATGTTCCCTTTGTG  
Contig\_BGBL2-16 TTCGTTGAACGGCATGTTGAGTCTGGATATCACCTGCGTCTGGACGATGTTCCCTTTGTG  
SH\_BGBL2 TTCGTTGAACGGCATGTTGAGTCTGGATATCACCTGCGTCTGGACGATGTTCCCTTTGTG  
right\_jct\_BGBL2 TTCGTTGAACGGCATGTTGAGTCTGGATATCACCTGCGTCTGGACGATGTTCCCTTTGTG  
Hd16\_DRJ1R TTCGTTGAACGGCATGTTGAGTCTGGATATCACCTGCGTCTGGACGATGTTCCCTTTGTG  
\*\*\*\*\*

left\_jct\_BGBL2 AATGTTACGGTTGAGTGTCTAGCCGTCGACTGCGCGCAAATCCATTTATACCCTCCA

```

Hd16_DRJ1L      AATGTTACGGTTGAGTGTCTAGCCGTCGACTGCGCGCAAATCCATTTATACCACTCCAA
Contig_BGBL2-19 AATGTTACGGTTGAGTGTCTAGCCGTCGACTGCGCGCAAATCCATTTATACCACTCCAA
Contig_BGBL2-12 AATGTTACGGTTGAGTGTCTAGCCGTCGACTGCGCGCAAATCCATTTATACCACTCCAA
Contig_BGBL2-16 AATGTTACGGTTGAGTGTCTAGCCGTCGACTGCGCGCAAATCCATTTATACCACTCCAA
SH_BGBL2        AATGTTACGGTTGAGTGTCTAGCCGTCGACTGCGCGCAAATCCATTTATACCACTCCAA
right_jct_BGBL2 AATGTTACGGTTGAGTGTCTAGCCGTCGACTGCGCGCAAATCCATTTATACCACTCCAA
Hd16_DRJ1R      AATGTTACGGTTGAGTGTCTAGCCGTCGACTGCGCGCAAATCCATTTATACCACTCCAG
*****

```

```

left_jct_BGBL2  TAGCTTATCAT
Hd16_DRJ1L      TAGCTTATCAT
Contig_BGBL2-19 TAGCTTATCAT
Contig_BGBL2-12 TAGCTTATCAT
Contig_BGBL2-16 TAGCTTATCAT
SH_BGBL2        TAGCTTATCAT
right_jct_BGBL2 TAATTTATCAT
Hd16_DRJ1R      TAATTTATCAT
** *****

```

### Segment Hd29 (present in BAC clone # BR-08001)

Sequences used for alignment:

- (i) DRJs from genome: Hd29\_DRJ1R, Hd29\_DRJ1L
- (ii) DRJs from BAC clone # BR-08001: left\_jct\_BR, right\_jct\_BR
- (iii) HdIV segments: Contig\_BR-1, Contig\_BR-4, Contig\_BR-7, Contig\_BR-10, SH\_BR

### Alignment

```

left_jct_BR      -----TAGCGATCGCAGTGCCTCGCTGCAT
Hd29_DRJ1L      ATTTTCGTGGCAGGCTTAGTT-TTGATGGAGGGACGTAGCGATCGCAGTGCCTCGCTGCAT
Contig_BR-10    -----TGGCCACCGCTGTGCGTTGTTGAAC
Contig_BR-1     -----TGGCCACCGCTGTGCGTTGTTGAAC
Contig_BR-7     -----TGGCCACCGCTGTGCGTTGTTGAAC
SH_BR           -----TGGCCACCGCTGTGCGTTGTTGAAC
Contig_BR-4     -----TGGCCACCGCTGTGCGTTGTTGAAC
right_jct_BR    -----TGGCCACCGCTGTGCGTTGTTGAAC
Hd29_DRJ1R      ATTTTCGTGGCAAGCGACTTTTCATCGTAGAACGGATGGCCACCGCTGTGCGTTGTTGAAC
* * * * *

```

```

left_jct_BR      CAATGATGCAGCTTTGTGTTCTTCAGAACGGTGAACATTCGTGCAACCAACTTGACACG
Hd29_DRJ1L      CAATGATGCAGCTTTGTGTTCTTCAGAACGGTGAACATTCGTGCAACCAACTTGACACG
Contig_BR-10    CAATGATCCAACCTTTGTGTTCTTCAGGAACGGTGAACATTCGTGCAATCAACTTGACACG
Contig_BR-1     CAATGATCCAACCTTTGTGTTCTTCAGGAACGGTGAACATTCGTGCAATCAACTTGACACG
Contig_BR-7     CAATGATCCAACCTTTGTGTTCTTCAGGAACGGTGAACATTCGTGCAATCAACTTGACACG
SH_BR           CAATGATCCAACCTTTGTGTTCTTCAGGAACGGTGAACATTCGTGCAATCAACTTGACACG
Contig_BR-4     CAATGATCCAACCTTTGTGTTCTTCAGGAACGGTGAACATTCGTGCAATCAACTTGACACG
right_jct_BR    CAATGATCCAACCTTTGTGTTCTTCAGAACGGTGAACATTCGTGCAATCAACTTGACACG
Hd29_DRJ1R      CAATGATCCAACCTTTGTGTTCTTCAGAACGGTGAACATTCGTGCAATCAACTTGACACG
***** ** *****

```

```

left_jct_BR      TCGCCATTCGGAGAGAGGTTTCGATAGACCATGAGGAATATCCAACGTCATTCATTTGTGC
Hd29_DRJ1L      TCGCCATTCGGAGAGAGGTTTCGATAGACCATGAGGAATATCCAACGTCATTCATTTGTGC
Contig_BR-10    TCGTCATGCGGCAAGAAATTCGATAGACCATGAGGAATATCGTAACGTCATTCATTCGTGC
Contig_BR-1     TCGTCATGCGGCAAGAAATTCGATAGACCATGAGGAATATCGTAACGTCATTCATTCGTGC
Contig_BR-7     TCGTCATGCGGCAAGAAATTCGATAGACCATGAGGAATATCGTAACGTCATTCATTCGTGC
SH_BR           TCGTCATGCGGCAAGAAATTCGATAGACCATGAGGAATATCGTAACGTCATTCATTCGTGC
Contig_BR-4     TCGTCATGCGGCAAGAAATTCGATAGACCATGAGGAATATCGTAACGTCATTCATTCGTGC
right_jct_BR    TCGTCATGCGGCAAGAAATTCGATAGACCATGAGGAATATCGTAACGTCATTCATTCGTGC
Hd29_DRJ1R      TCGTCATGCGGCAAGAAATTCGATAGACCATGAGGAATATCGTAACGTCATTCATTCGTGC
*** ** *

```

```

left_jct_BR      GCACT--TCTAGGCTTTTGCAAT---CGAATCATTGCAGATACGCATTTTGAAGCAACGT
Hd29_DRJ1L      GCACT--TCTAGGCTATTGCAAT---CGAATCATTGCAGATACGCATTTTGAAGCAACGT
Contig_BR-10    ACGCATTCCTAGGACAAGTCTCTGCGCTCGAATCGTTGCGGATGCATTTGGAAGCAACGT
Contig_BR-1     ACGCATTCCTAGGACAAGTCTCTGCGCTCGAATCGTTGCGGATGCATTTGGAAGCAATGT
Contig_BR-7     ACGCATTCCTAGGACAAGTCTCTGCGCTCGAATCGTTGCGGATGCATTTGGAAGCAATGT
SH_BR           ACGCATTCCTAGGACAAGTCTCTGCGCTCGAATCGTTGCGGATGCATTTGGAAGCAATGT
Contig_BR-4     ACGCATTCCTAGGACAAGTCTCTGCGCTCGAATCGTTGCGGATGCATTTGGAAGCAATGT
right_jct_BR    ACGCATTCCTAGGACAAGTCTCTGCGCTCGAATCGTTGCGGATGCATTTGGAAGCAATGT
Hd29_DRJ1R      ACGCATTCCTAGGACAAGTCTCTGCGCTCGAATCGTTGCGGATGCATTTGGAAGCAATGT
* * * * *

```

```

left_jct_BR      GGTTCAAATGATGTTGGGAAAAGTGTGCAAAATTTATTAGATTGACCGAATGTTTCATT

```

|              |                                                                                                           |
|--------------|-----------------------------------------------------------------------------------------------------------|
| Hd29_DRJ1L   | GGTTC <b>CA</b> AATGATGTTGGGGAAAAGTGTG <b>CA</b> AAACATTTATTAGATTGACCGAATGTT <b>C</b> ATT                 |
| Contig_BR-10 | GGTTC <b>CA</b> AATGATGTTGGGGAAAAGTGTG <b>CA</b> AAACATTTATTAGATTGACCGAATGTT <b>C</b> ATT                 |
| Contig_BR-1  | GTCTCCAAT <b>T</b> ATGTTGGGAAAAGTGTCC <b>AA</b> AAATTTATTAGATTGACCGAATGTT <b>A</b> AATT                   |
| Contig_BR-7  | GTCTCCAAT <b>T</b> ATGTTGGGAAAAGTGTCC <b>AA</b> AAATTTATTAGATTGACCGAATGTT <b>A</b> AATT                   |
| SH_BR        | GTCTCCAAT <b>T</b> ATGTTGGGAAAAGTGTCC <b>AA</b> AAATTTATTAGATTGACCGAATGTT <b>A</b> AATT                   |
| Contig_BR-4  | GTCTCCAAT <b>T</b> ATGTTGGGAAAAGTGTCC <b>AA</b> AAATTTATTAGATTGACCGAATGTT <b>A</b> AATT                   |
| right_jct_BR | G <b>TCTC</b> CAAT <b>T</b> ATGTTGGGAAAAGTGT <b>C</b> CAAA <b>A</b> ATTTATTAGATTGACCGAATGTT <b>A</b> AATT |
| Hd29_DRJ1R   | G <b>TCTC</b> CAAT <b>T</b> ATGTTGGGAAAAGTGT <b>C</b> CAAA <b>A</b> ATTTATTAGATTGACCGAATGTT <b>A</b> AATT |

\* \* \* \* \*

|              |                                                                                                                         |
|--------------|-------------------------------------------------------------------------------------------------------------------------|
| left_jct_BR  | TG <b>AA</b> CTCTTG <b>AA</b> AA <b>CT</b> CACAGCTCGAGTT <b>AA</b> GGAGAGTT <b>GA</b> CGGGATA <b>GA</b> CGT <b>G</b> AC |
| Hd29_DRJ1L   | TG <b>AA</b> CTCTTG <b>AA</b> AA <b>CT</b> CACAGCTCGAGTT <b>G---</b> AGAGTT <b>GA</b> CGGGATA <b>GA</b> CGT <b>G</b> AC |
| Contig_BR-10 | TG <b>AA</b> CTCTTG <b>AA</b> AA <b>CT</b> CACAGCTCGAGTT <b>AA</b> GGAGAGTT <b>GA</b> CGGGATA <b>GA</b> CGT <b>G</b> AC |
| Contig_BR-1  | TGGAGCTCTTG <b>AA</b> AA <b>CT</b> CACAGCTCGAGTT <b>AA</b> CGAGAGTT <b>GA</b> AGGGATA <b>AG</b> CGT <b>C</b> AC         |
| Contig_BR-7  | TGGAGCTCTTG <b>AA</b> AA <b>CT</b> CACAGCTCGAGTT <b>AA</b> CGAGAGTT <b>GA</b> AGGGATA <b>AG</b> CGT <b>C</b> AC         |
| SH_BR        | TGGAGCTCTTG <b>AA</b> AA <b>CT</b> CACAGCTCGAGTT <b>AA</b> CGAGAGTT <b>GA</b> AGGGATA <b>AG</b> CGT <b>C</b> AC         |
| Contig_BR-4  | TGGAGCTCTTG <b>AA</b> AA <b>CT</b> CACAGCTCGAGTT <b>AA</b> CGAGAGTT <b>GA</b> AGGGATA <b>AG</b> CGT <b>C</b> AC         |
| right_jct_BR | TG <b>GA</b> CTCTTG <b>AA</b> AA <b>CT</b> CACAGCTCGAGTT <b>AA</b> CGAGAGTT <b>GA</b> AGGGATA <b>AG</b> CGT <b>C</b> AC |
| Hd29_DRJ1R   | TG <b>GA</b> CTCTTG <b>AA</b> AA <b>CT</b> CACAGCTCGAGTT <b>AA</b> CGAGAGTT <b>GA</b> AGGGATA <b>AG</b> CGT <b>C</b> AC |

\* \* \* \* \*

|              |                                                                                                                                     |
|--------------|-------------------------------------------------------------------------------------------------------------------------------------|
| left_jct_BR  | GTTCTTCATGG <b>AA</b> GGT <b>G</b> GGCTCG <b>CA</b> AA <b>CG</b> TCGCAT <b>G</b> CAGCTTGC <b>G</b> AGTTCC <b>AA</b> AT <b>G</b> AAA |
| Hd29_DRJ1L   | GTTCTTCATGG <b>AA</b> GGT <b>G</b> GGCTCG <b>CA</b> AA <b>CG</b> TCGCAT <b>G</b> CAGCTTGC <b>G</b> AGTTCC <b>AA</b> AT <b>G</b> AAA |
| Contig_BR-10 | GTTCTTCATGG <b>AA</b> GGT <b>G</b> GGCTCG <b>CA</b> AA <b>CG</b> TCGCAT <b>G</b> CAGCTTGC <b>G</b> AGTTCC <b>AA</b> AT <b>G</b> AAA |
| Contig_BR-1  | GTTCTTCATGG <b>AA</b> GGT <b>G</b> GGCTCG <b>CA</b> AA <b>CG</b> TCGCAT <b>G</b> CAGCTTGC <b>G</b> AGTTCC <b>AA</b> AT <b>G</b> AAA |
| Contig_BR-7  | GTTCTTCATGG <b>AA</b> GGT <b>G</b> GGCTCG <b>CA</b> AA <b>CG</b> TCGCAT <b>G</b> CAGCTTGC <b>G</b> AGTTCC <b>AA</b> AT <b>G</b> AAA |
| SH_BR        | GTTCTTCATGG <b>AA</b> GGT <b>G</b> GGCTCG <b>CA</b> AA <b>CG</b> TCGCAT <b>G</b> CAGCTTGC <b>G</b> AGTTCC <b>AA</b> AT <b>G</b> AAA |
| Contig_BR-4  | GTTCTTCATGG <b>AA</b> GGT <b>G</b> GGCTCG <b>CA</b> AA <b>CG</b> TCGCAT <b>G</b> CAGCTTGC <b>G</b> AGTTCC <b>AA</b> AT <b>G</b> AAA |
| right_jct_BR | GTTCTTCATGG <b>AA</b> GGT <b>G</b> GGCTCG <b>CA</b> AA <b>CG</b> TCGCAT <b>G</b> CAGCTTGC <b>G</b> AGTTCC <b>AA</b> AT <b>G</b> AAA |
| Hd29_DRJ1R   | GTTCTTCATGG <b>AA</b> GGT <b>G</b> GGCTCG <b>CA</b> AA <b>CG</b> TCGCAT <b>G</b> CAGCTTGC <b>G</b> AGTTCC <b>AA</b> AT <b>G</b> AAA |

\* \* \* \* \*

|              |                                                                            |
|--------------|----------------------------------------------------------------------------|
| left_jct_BR  | <b>ACA</b> ACTGCGCGGGGTATTGTT <b>T</b> ATTCT <b>GG</b> GAG <b>AC</b> ACCG  |
| Hd29_DRJ1L   | <b>ACA</b> ACTGCGCGGGGTATTGTT <b>T</b> ATTCT <b>GG</b> GAG <b>AC</b> ACCG  |
| Contig_BR-10 | <b>ACA</b> ACTGCGCGGGGTATTGTT <b>T</b> ATTCT <b>GG</b> GAG <b>AC</b> ACCG  |
| Contig_BR-1  | <b>ACA</b> ACTGCGCGGGGTATTGTT <b>T</b> ATTCT <b>GG</b> GAG <b>AC</b> ACCG  |
| Contig_BR-7  | <b>ACA</b> ACTGCGCGGGGTATTGTT <b>T</b> ATTCT <b>GG</b> GAG <b>AC</b> ACCG  |
| SH_BR        | <b>ACA</b> ACTGCGCGGGGTATTGTT <b>T</b> ATTCT <b>GG</b> GAG <b>AC</b> ACCG  |
| Contig_BR-4  | <b>C</b> -AACTGCGTGGGGTATTGTT <b>T</b> ATTCT <b>T</b> GGAGAG <b>AC</b> CGG |
| right_jct_BR | <b>C</b> -AACTGCGTGGGGTATTGTT <b>T</b> ATTCT <b>T</b> GGAGAG <b>AC</b> CGG |
| Hd29_DRJ1R   | <b>C</b> -AACTGCGTGGGGTATTGTT <b>T</b> ATTCT <b>T</b> GGAGAG <b>AC</b> CGG |

\* \* \* \* \* no switch ??? \*

## Segment Hd22

Sequences used for alignment:

- (i) DRJs from genome: Hd22\_DRJ1R, Hd22\_DRJ1L
- (ii) DRJs from BAC clone # CN-29M18: left\_junction, right\_junction
- (iii) HdIV segments: Contig\_CN-31, Contig\_CN-33, Contig\_CN-36, Contig\_CN-39

## Alignment

|                |                                                                                                                                           |
|----------------|-------------------------------------------------------------------------------------------------------------------------------------------|
| left_junction  | CAATAGGGTGAAT <b>T</b> CA <b>AA</b> CGCT <b>GGT</b> CC <b>AA</b> TGGCAGGAGCTT <b>GGC</b> AG <b>G</b> ACAGAT <b>G</b> ACAT <b>C</b>        |
| Hd22_DRJ1L     | -----AA <b>T</b> CA <b>AA</b> CGCT <b>GGT</b> CC <b>AA</b> TGGCAGGAGCTT <b>GGC</b> AG <b>G</b> ACAGAT <b>G</b> ACAT <b>C</b>              |
| Contig_CN-31   | CAATAGGGTGAAT <b>T</b> CA <b>AA</b> CGCT <b>GGT</b> CC <b>AA</b> TGGCAGGAGCTT <b>GGC</b> AG <b>G</b> ACAGAT <b>G</b> ACAT <b>C</b>        |
| Contig_CN-33   | CAATAGGGTGAAT <b>T</b> CA <b>AA</b> CGCT <b>GGT</b> CC <b>AA</b> TGGCAGGAGCTT <b>GGC</b> AG <b>G</b> ACAGAT <b>G</b> ACAT <b>C</b>        |
| Contig_CN-39   | CAATAGGGTGAAT <b>T</b> CA <b>AA</b> CGCT <b>GGT</b> CC <b>AA</b> TGGCAGGAGCTT <b>GGC</b> AG <b>G</b> ACAGAT <b>G</b> ACAT <b>C</b>        |
| Contig_CN-36   | CAATAGGGTGAAT <b>T</b> CA <b>AA</b> CGCT <b>GGT</b> CC <b>AA</b> TGGCAGGAGCTT <b>G</b> CA <b>AG</b> GCAGAT <b>G</b> AT <b>C</b>           |
| right_junction | CATTGAGAAAA <b>C</b> TA <b>AG</b> CG <b>CG</b> CA <b>T</b> AG <b>CA</b> AATGGCAGGAGCTT <b>GA</b> CA <b>AG</b> GCAGAT <b>G</b> AT <b>C</b> |
| Hd22_DRJ1R     | -----AA <b>C</b> TA <b>AG</b> CG <b>CG</b> CA <b>T</b> AG <b>CA</b> AATGGCAGGAGCTT <b>GA</b> CA <b>AG</b> GCAGAT <b>G</b> AT <b>C</b>     |

\* \* \* \* \*

|                |                                                                                                                  |
|----------------|------------------------------------------------------------------------------------------------------------------|
| left_junction  | GAGTGA <b>A</b> TGCGTAGG <b>AG</b> TCT <b>GA</b> AA <b>AG</b> CG <b>CG</b> TCGTGAACAATATCGTGACCATTGATCG <b>C</b> |
| Hd22_DRJ1L     | GAGTGA <b>A</b> TGCGTAGG <b>AG</b> TCT <b>GA</b> AA <b>AG</b> CG <b>CG</b> TCGTGAACAATATCGTGACCATTGATCG <b>C</b> |
| Contig_CN-31   | GAGTGA <b>A</b> TGCGTAGG <b>AG</b> TCT <b>GA</b> AA <b>AG</b> CG <b>CG</b> TCGTGAACAATATCGTGACCATTGATCG <b>C</b> |
| Contig_CN-33   | GAGTGA <b>A</b> TGCGTAGG <b>AG</b> TCT <b>GA</b> AA <b>AG</b> CG <b>CG</b> TCGTGAACAATATCGTGACCATTGATCG <b>C</b> |
| Contig_CN-39   | GAGTGA <b>A</b> TGCGTAGG <b>AG</b> TCT <b>GA</b> AA <b>AG</b> CG <b>CG</b> TCGTGAACAATATCGTGACCATTGATCG <b>C</b> |
| Contig_CN-36   | GAGTGA <b>A</b> TGCGTAGG <b>AG</b> TCT <b>GA</b> AA <b>AG</b> CG <b>CG</b> TCGTGAACAATATCGTGACCATTGATCG <b>C</b> |
| right_junction | GAGTGA <b>A</b> TGCGTAGG <b>AG</b> TCT <b>GA</b> AA <b>AG</b> CG <b>CG</b> TCGTGAACAATATCGTGACCATTGATCG <b>C</b> |
| Hd22_DRJ1R     | GAGTGA <b>A</b> TGCGTAGG <b>AG</b> TCT <b>GA</b> AA <b>AG</b> CG <b>CG</b> TCGTGAACAATATCGTGACCATTGATCG <b>C</b> |

\* \* \* \* \*

|                |                                                            |
|----------------|------------------------------------------------------------|
| left_junction  | CATAGCGACTTGCCGCATCTCAGGATCGTGATCTAAAA-----CGTTTCACGTGA    |
| Hd22_DRJ1L     | CATAGCGACTTGCCGCATCTCAGGATCGTGATCTAAAA-----CGTTTCACGTGA    |
| Contig_CN-31   | CAAGCGACTTGGCGACTTGGCACACGTCAGCGTCAAGTTCCACAAAATCTGACGCGA  |
| Contig_CN-33   | CAAGCGACTTGGCGACTTGGCACACGTCAGCGTCAAGTTCCACAAAATCTGACGCGA  |
| Contig_CN-39   | CATAGCGACTTGGCGACTTGGCACACGTCAGCGTCAAGTTCCACAAAATCTGACGCGA |
| Contig_CN-36   | CACAGCGACTTGGCGACTTGGCACACGTCAGCGTCAAGTTCCACAAAATCTGACGCGA |
| right_junction | CACAGCGACTTGGCGACTTGGCACACGTCAGCGTCAAGTTCCACAAAATCTGACGCGA |
| Hd22_DRJ1R     | CACAGCGACTTGGCGACTTGGCACACGTCAGCGTCAAGTTCCACAAAATCTGACGCGA |

\*\* \*\*\*\*\* \*\* \* \* \* \* \* \* \* \* \* \* \* \* \* \* \* \* \* \* \* \* \*

### Segment Hd19

Sequences used for alignment:

- (i) DRJs from genome: Hd19\_DRJ1R, Hd19\_DRJ1L
- (ii) DRJs from BAC clone # CP-38F08+CQ-40J21: CPCQ\_right, CPCQ\_left
- (iii) HdIV segments: jct\_CPCQ-28, jct\_CPCQ-27, jct\_CPCQ-23, jct\_CPCQ-22

### Alignment

|             |                                                             |
|-------------|-------------------------------------------------------------|
| CPCQ_left   | TTTTGCTGTTTCATGTTTCAGAGCAGCGGTCTATGTGATACACGCTGCTTAGCCTGGT  |
| Hd19_DRJ1L  | TTTTGCTGTTTCATGTTTCAGAGCAGCGGTCTATGTGATACACGCTGCTTAGCCTGGT  |
| jct_CPCQ-28 | TTTTGCTGCTTCATGTTTCAGAGCAGCTTGTCTACATGATACACGCTGATTTGTC-TGT |
| jct_CPCQ-27 | TTTTGCTGCTTCATGTTTCAGAGCAGCTTGTCTACATGATACACGCTGATTTGTC-TGT |
| jct_CPCQ-23 | TTTTGCTGCTTCATGTTTCAGAGCAGCTTGTCTACATGATACACGCTGATTTGTC-TGT |
| jct_CPCQ-22 | TTTTGCTGCTTCATGTTTCAGAGCAGCTTGTCTACATGATACACGCTGATTTGTC-TGT |
| CPCQ_right  | TTTTGCTGCTTCATGTTTCAGAGCAGCTTGTCTACATGATACACGCTGATTTGTC-TGT |
| Hd19_DRJ1R  | TTTTGCTGCTTCATGTTTCAGAGCAGCTTGTCTACATGATACACGCTGATTTGTC-TGT |

\*\*\*\*\* \*\*\*\*\* \*\*\*\*\* \*\*\*\*\* \*\*\*\*\* \*\*\*\*\* \*\*\*\*\* \*\*\*\*\* \*\*\*\*\* \*\*\*\*\*

|             |                                                 |
|-------------|-------------------------------------------------|
| CPCQ_left   | GACGGCAGCATGGTTCCTCCTCATGCTGCACGAGCTCTGTGAGCTTT |
| Hd19_DRJ1L  | GACGGCAGCATGGTTCCTCCTCATGCTGCACGAGCTCTGTGAGCTTT |
| jct_CPCQ-28 | GACGGCAGCATGGTTCCTCCTCATGCTGCACGAGCTCTGTGAGCTTT |
| jct_CPCQ-27 | GACGGCAGCATGGTTCCTCCTCATGCTGCACGAGCTCTGTGAGCTTT |
| jct_CPCQ-23 | GACGGCAGCATGGTTCCTCCTCATGCTGCACGAGCTCTGTGAGCTTT |
| jct_CPCQ-22 | GACGGCAGCATGGTTCCTCCTCATGCTGCACGAGCTCTGTGAGCTTT |
| CPCQ_right  | GACGGCAGCATGGTTCCTCCTCATGCTGCACGAGCTCTGTGAGCTTT |
| Hd19_DRJ1R  | GACGGCAGCATGGTTCCTCCTCATGCTGCACGAGCTCTGTGAGCTTT |

\*\*\*\*\* \*\* \* \* \* \* \* \* \* \* \* \* \* \* \* \* \* \* \* \* \* \* \*

### Segments Hd28

Sequences used for alignment:

- (i) DRJs from genome: Hd28\_DRJ1R, Hd28\_DRJ1L, Hd24\_DRJ1R (reverse), Hd24\_DRJ1L (reverse)
- (ii) DRJs from BAC clone # CR-47M17: CR\_left, CR\_right
- (iii) HdIV segments: Contig\_CR-05, Contig\_CR-06, Contig\_CR-09, Contig\_CR-10

### Alignment

|              |                                                                |
|--------------|----------------------------------------------------------------|
| CR_left      | GCCTTTGAGCTGAGCT-GCATGAGGTTTTCATGTCCGATAACTGGATTCATTGTCA       |
| Hd28_DRJ1L   | GCCTTTGAGCTGAGCT-GCATGAGGTTTTCATGTCCGATAACTGGATTCATTGTCA       |
| Contig_CR-05 | GCCTTTGGAGCTAAACTTGCACGAGATTTCCGGTGTCCGTGATAACTGAAATGGCATTGTCA |
| Contig_CR-06 | GCCTTTGGAGCTAAACTTGCACGAGATTTCCGGTGTCCGTGATAACTGAAATGGCATTGTCA |
| CR_right     | GCCTTTGAGCTAAACTTGCACGAGATTTCCGGTGTCCGTGATAACTGAAATGGCATTGTCA  |
| Hd28_DRJ1R   | GCCTTTGAGCTAAACTTGCACGAGATTTCCGGTGTCCGTGATAACTGAAATGGCATTGTCA  |

\*\*\*\*\* \* \* \* \* \* \* \* \* \* \* \* \* \* \* \* \* \* \* \* \* \*

|              |                                                             |
|--------------|-------------------------------------------------------------|
| CR_left      | GGCGTAAGCATTATGACGGCGGTGGTGTAGGCGTTGCTTGGGAAGGTTGGTGAGCCACG |
| Hd28_DRJ1L   | GGCGTAAGCATTATGACGGCGGTGGTGTAGGCGTTGCTTGGGAAGGTTGGTGAGCCACG |
| Contig_CR-05 | GGCGTAATATTTATGACGGC-----GGTGATG                            |
| Contig_CR-06 | GGCGTAATATTTATGACGGC-----GGTGATG                            |
| CR_right     | GGCGTAAATTTATGACGGC-----GGTGATG                             |
| Hd28_DRJ1R   | GGCGTAAATTTATGACGGC-----GGTGATG                             |

\*\*\*\*\* \*\*\*\*\* \* \* \* \* \*



CR\_left TCGACGTAGATTTCAGGCGTGAACGGAGAGCTGAAAGGTATAGTAGTCGTTTCGACCAACT  
Hd28\_DRJ1L TCGACGTAGATTTCAGGCGTGAACGGAGAGCTGAAAGGTATAGTAGTCGTTTCGACCAACT  
Contig\_CR-05 TTAACGTAGGTTTCAGGCGTTAGACTGAGAGCCGGAAGGTATGGTAGTCGTTTCGACCGTCT  
Contig\_CR-06 TTAACGTAGGTTTCAGGCGTTAGACTGAGAGCCGGAAGGTATGGTAGTCGTTTCGACCGTCT  
CR\_right TTAACGTAGGTTTCAGGCGTTAGACTGAGAGCCGGAAGGTATGGTAGTCGTTTCGACCGTCT  
Hd28\_DRJ1R TTAACGTAGGTTTCAGGCGTTAGACTGAGAGCCGGAAGGTATGGTAGTCGTTTCGACCGTCT  
\* \* \* \* \*

CR\_left CGGAATCACACCGACGAAACTATTGTCCATTGCTCAGGCTATGAGGACTTGAGGCAAT  
Hd28\_DRJ1L CGGAATCACACCGACGAAACTATTGTCCATTGCTCAGGCTATGAGGACTTGAGGCAAT  
Contig\_CR-05 CCGAATCACGCTGACGAGAACTCTTCGTTTCATCGCTTAAGCTCTGAGGACTTGACGCAAT  
Contig\_CR-06 CCGAATCACGCTGACGAGAACTCTTCGTTTCATCGCTTAAGCTCTGAGGACTTGACGCAAT  
CR\_right CCGAATCACGCTGACGAGAACTCTTCGTTTCATCGCTTAAGCTCTGAGGACTTGACGCAAT  
Hd28\_DRJ1R CCGAATCACGCTGACGAGAACTCTTCGTTTCATCGCTTAAGCTCTGAGGACTTGACGCAAT  
\* \* \* \* \*

CR\_left CAAGTTCGGACGCAAAGT-----TTTGTTCGGCCATAGATCACAAAGTAAGAA  
Hd28\_DRJ1L CAAGTTCGGACGCAAAGT-----TTTGTTCGGCCATAGATCACAAAGTAAGAA  
Contig\_CR-05 CAAGTTCGGATGATAAACGCCAGACGCAAAGTTTGTTCATAGATCACAAAGTAAGAA  
Contig\_CR-06 CAAGTTCGGATGATAAACGCCAGACGCAAAGTTTGTTCATAGATCACAAAGTAAGAA  
CR\_right CAAGTTCGGATGATAAACGCCAGACGCAAAGTTTGTTCATAGATCACAAAGTAAGAA  
Hd28\_DRJ1R CAAGTTCGGATGATAAACGCCAGACGCAAAGTTTGTTCATAGATCACAAAGTAAGAA  
\* \* \* \* \*

CR\_left CAGTTCTGGCAGACTGGACAGTCCACCGATACCTCACAAGACTGTAAA-ACCTCTGGAC  
Hd28\_DRJ1L CAGTTCTGGCAGACTGGACAGTCCACCGATACCTCACAAGACTGTAAA-ACCTCTGGAC  
Contig\_CR-05 CAGTTCTTACGGACCTGACAGTCCAACATTAATCTCAGACACTGTAAA-ACCTATGGAC  
Contig\_CR-06 CAGTTCTTACGGACCTGACAGTCCAACATTAATCTCAGACACTGTAAA-ACCTATGGAC  
CR\_right CAGTTCTTACGGACCTGACAGTCCAACATTAATCTCAGACACTGTAAA-ACCTATGGAC  
Hd28\_DRJ1R CAGTTCTTACGGACCTGACAGTCCAACATTAATCTCAGACACTGTAAA-ACCTATGGAC  
\* \* \* \* \*

CR\_left GTACTGCGCACGTACCCAGTCCACGAAACACTCGTGCCACATCCATTTGATGTTGGCTT  
Hd28\_DRJ1L GTACTGCGCACGTACCCAGTCCACGAAACACTCGTGCCACATCCATTTGATGTTGGCTT  
Contig\_CR-05 GTACTTTCGCACGTACCCGAGTCCACGAAACACTCGTGCTACATCCATTTGACGTTGGCCT  
Contig\_CR-06 GTACTTTCGCACGTACCCGAGTCCACGAAACACTCGTGCTACATCCATTTGACGTTGGCCT  
CR\_right GTACTTTCGCACGTACCCAGTCCACGAAACACTCGTGCTACATCCATTTGACGTTGGCCT  
Hd28\_DRJ1R GTACTTTCGCACGTACCCAGTCCACGAAACACTCGTGCTACATCCATTTGACGTTGGCCT  
\* \* \* \* \*

CR\_left CTGCCAGGCATGTCGCTAT--AGATTTCCAGCGTGTGCCCGTGTCCAGAAAAGCTTT  
Hd28\_DRJ1L CTGCCAGGCATGTCGCTAT--AGATTTCCAGCGTGTGCCCGTGTCCAGAAAAGCTTT  
Contig\_CR-05 TCT---GACAAGGCCACTATAGAGTCCAGCGTGTGCCCGTGTCCAGAAAAGCTTT  
Contig\_CR-06 TCT---GACAAGGCCACTATAGAGTCCAGCGTGTGCCCGTGTCCAGAAAAGCTTT  
CR\_right TCT---GACAAGGCCACTATAGAGTCCAGCGTGTGCCCGTGTCCAGAAAAGCTTT  
Hd28\_DRJ1R TCT---GACAAGGCCACTATAGAGTCCAGCGTGTGCCCGTGTCCAGAAAAGCTTT  
\* \* \* \* \*

CR\_left GTTCACAACCGGACTTTTACTGTACCTTTGTGTTACAGTTGCGTTACGTAACACTACT  
Hd28\_DRJ1L GTTCACAACCGGACTTTTACTGTACCTTTGTGTTACAGTTGCGTTACGTAACACTACT  
Contig\_CR-05 T-ACTCCAACCGGACTTTTACTGTACCTTTGTGTTACAGTTGCGTTACGTAACACTACT  
Contig\_CR-06 T-ACTCCAACCGGACTTTTACTGTACCTTTGTGTTACAGTTGCGTTACGTAACACTACT  
CR\_right T-ACTCCAACCGGACTTTTACTGTACCTTTGTGTTACAGTTGCGTTACGTAACACTACT  
Hd28\_DRJ1R T-ACTCCAACCGGACTTTTACTGTACCTTTGTGTTACAGTTGCGTTACGTAACACTACT  
\* \* \* \* \*

CR\_left ACTGTGGAACCTTCTACTGCCACAGTACAACAGCTATCGACAACGTGTTCTTTCAGTAT  
Hd28\_DRJ1L ACTGTGGAACCTTCTACTGCCACAGTACAACAGCTATCGACAACGTGTTCTTTCAGTAT  
Contig\_CR-05 ACTGTGGAACCTTCTACTGCCACAGTACAACAGCTATCGACAACAGTCTTTCAGTAT  
Contig\_CR-06 ACTGTGGAACCTTCTACTGCCACAGTACAACAGCTATCGACAACAGTCTTTCAGTAT  
CR\_right ACTGTGGAACCTTCTACTGCCACAGTACAACAGCTATCGACAACAGTCTTTCAGTAT  
Hd28\_DRJ1R ACTGTGGAACCTTCTACTGCCACAGTACAACAGCTATCGACAACAGTCTTTCAGTAT  
\* \* \* \* \*

CR\_left CAAGAAGTCATTATGCAAGTAGAGAATGGCCGGGTTTTAAGTTGCATGAAA-GCACTCAA  
Hd28\_DRJ1L CAAGAAGTCATTATGCAAGTAGAGAATGGCCGGGTTTTAAGTTGCATGAAA-GCACTCAA  
Contig\_CR-05 CAAGAAGTAATTATCAAGTGGAGAATGGCCGGGTTTTAAGTTGCATGAAA-GCACTCAA  
Contig\_CR-06 CAAGAAGTAATTATCAAGTGGAGAATGGCCGGGTTCGG-AGTTGCATGAAA-GCACTCAA  
CR\_right CAAGAAGTAATTATCAAGTGGAGAATGGCCGGGTTCGG-AGTTGCATGAAA-GCACTCAA

```
Hd28_DRJ1R CAAGAAGTAATTATCAAGTGGAGAATGGCCGGGTGG-AGTTGCATGAAAAGCACGGAA
***** ***** ***** ***** ***** ***** ***** **

CR_left TTGTCTACAATGCAGACGAG
Hd28_DRJ1L TTGTCTACAATGCAGACGAG
Contig_CR-05 TTGTCTACAATGCAGACGAG
Contig_CR-06 TTGTCTACAATGCAGACGAG
CR_right GTGTGTACAATACAGACGGG
Hd28_DRJ1R GTGTGTACAATACAGACGGG
*** ***** ***** *
```
