# Supplementary material for: Conserved and specific genomic features of endogenous polydnaviruses revealed by whole genome sequencing of two ichneumonid wasps
Source: bioRxiv or medRxiv preprint supplement (doi:10.1101/861310), 2019-12-02
Supplement: Supplementary file [file media-8.pdf]

**Genes in syntenic blocks Figure 6C, a**

| Hd scaffold | Position in scaffold | Hd gene ID | Orthogroup # | Best Blast hit                                                                                      | Expect              | Cs gene                  | Orthogroup # | Position in scaffold |
|-------------|----------------------|------------|--------------|-----------------------------------------------------------------------------------------------------|---------------------|--------------------------|--------------|----------------------|
| scaffold144 | 1380719..1397417     | HD005010   | OG0000722    | gi 817190146 ref XP_012270430.1 uncharacterized protein LOC105694386 isoform X2 [Orussus abietir    | Expect = 0.000e+0   | gene.scaffold_16.g181.t1 | OG0000722    | 2082674..2097848     |
| scaffold144 | 1402033..1404758     | HD005011   | OG0008876    | gi 1000730346 ref XP_015587582.1 dynein assembly factor 4, axonemal-like [Cephus cinctus]           | Expect = 8.300e-150 | gene.scaffold_16.g180.t1 | OG0008876    | 2075777..2079078     |
| scaffold144 | 1405145..1406140     | HD005012   | OG0008079    | gi 340719499 ref XP_003398190.1 vascular endothelial growth factor A-A [Bombus terrestris]          | Expect = 7.800e-47  | gene.scaffold_16.g179.t1 | OG0008079    | 2074775..2075425     |
| scaffold144 | 1410042..1410578     | HD005013   | OG0009360    | gi 987906890 ref XP_015428945.1 PREDICTED: uncharacterized protein LOC107185710 [Dufourea nov       | Expect = 2.700e-41  | gene.scaffold_16.g178.t1 | OG0009360    | 2064292..2070214     |
| scaffold144 | 1412742..1423051     | HD005014   | OG0007034    | gi 755949684 ref XP_011301181.1 PREDICTED: nucleoprotein TPR [Fopius arisanus]                      | Expect = 0.000e+0   | gene.scaffold_16.g177.t1 | OG0007034    | 2058216..2067490     |
| scaffold144 | 1423611..1429572     | HD005015   | OG0004177    | gi 1000729872 ref XP_015587356.1 protein virilizer isoform X1 [Cephus cinctus]                      | Expect = 0.000e+0   | NA                       |              |                      |
| scaffold144 | 1429964..1432653     | HD005016   | OG0007546    | gi 1070214570 ref XP_018376608.1 PREDICTED: pentatricopeptide repeat-containing protein 1, mitochr  | Expect = 7.200e-127 | NA                       |              |                      |
| scaffold144 | 1434554..1435954     | HD005017   | OG0009748    | gi 1070154465 ref XP_018340726.1 PREDICTED: RISC-loading complex subunit TARBP2-like [Trachymyr     | Expect = 2.500e-30  | NA                       |              |                      |
| scaffold144 | 1438643..1440697     | HD005018   | OG0003141    | gi 645023101 ref XP_008202437.1 PREDICTED: neuralized-like protein 2 [Nasonia vitripennis]          | Expect = 8.100e-114 | gene.scaffold_16.g36.t1  | OG0003141    | 254028..255633       |
| scaffold144 | 1442194..1445201     | HD005019   | OG0003140    | gi 1317987018 ref XP_023287837.1 neuronal acetylcholine receptor subunit alpha-5 isoform X1 [Orussu | Expect = 2.500e-59  |                          |              |                      |
| scaffold144 | 1446370..1448826     | HD005020   | OG0009176    | gi 939631532 ref XP_008554100.2 PREDICTED: neuronal acetylcholine receptor subunit alpha-5-like [N  | Expect = 7.200e-80  | gene.scaffold_16.g37.t1  | OG0009176    | 257530..261137       |
| scaffold144 | 1450485..1451362     | HD005021   | OG0007822    | Cys2_Hd20                                                                                           |                     |                          |              |                      |
| scaffold144 | 1454299..1455511     | HD005022   | OG0007822    | Cys1_Hd20                                                                                           |                     |                          |              |                      |
| scaffold144 | 1457007..1457513     | HD005023   | OG0001009    | gi 805787897 ref XP_012141035.1 PREDICTED: uncharacterized protein LOC100876911 isoform X2 [M       | Expect = 2.000e-20  | gene.scaffold_16.g38.t1  | OG0001009    | 270567..274688       |
| scaffold144 | 1464373..1467934     | HD005024   | OG0001009    | gi 795056915 ref XP_011872016.1 PREDICTED: uncharacterized protein LOC105564328 isoform X1 [Vc      | Expect = 2.100e-124 |                          |              |                      |
| scaffold144 | 1472127..1477975     | HD005025   | OG0006050    | gi 1000745701 ref XP_015595595.1 cysteine and histidine-rich protein 1 homolog isoform X5 [Cephus c | Expect = 2.400e-190 | gene.scaffold_16.g39.t1  | OG0006050    | 278822..284602       |
| scaffold144 | 1479354..1480103     | HD005026   | orphan       | gi 759078894 ref XP_011349245.1 polyadenylate-binding protein 1 [Ooceraea biro]                     | Expect = 2.100e-23  | gene.scaffold_16.g40.t1  | orphan       | 287471..288253       |
| scaffold144 | 1508038..1591917     | HD005027   | OG0001516    | gi 755949182 ref XP_011301029.1 PREDICTED: regulating synaptic membrane exocytosis protein 1 iso    | Expect = 0.000e+0   | gene.scaffold_16.g42.t1  | orphan       | 331489..359465       |
| scaffold144 | 1601947..1606850     | HD005028   | orphan       | gi 998501744 ref XP_015510887.1 PREDICTED: uncharacterized protein LOC107217756 [Neodiprion l       | Expect = 2.200e-36  | gene.scaffold_16.g43.t1  | OG0001516    | 385633..394202       |
| scaffold144 |                      |            |              |                                                                                                     |                     | gene.scaffold_16.g44.t1  | OG0001516    | 402325..405981       |
| scaffold144 | 1607444..1607878     | HD005029   | OG0007431    | gi 815909475 ref XP_003489119.2 chromosome transmission fidelity protein 8 homolog [Bombus imp      | Expect = 9.300e-30  | gene.scaffold_16.g45.t1  | OG0001516    | 413940..415699       |
| scaffold144 | 1609469..1618501     | HD005030   | OG0001137    | gi 970888608 ref XP_015109471.1 PREDICTED: uncharacterized protein LOC107036203 [Diachasma all      | Expect = 2.600e-122 | gene.scaffold_16.g46.t1  | OG0007431    | 427568..428032       |
|             |                      |            |              |                                                                                                     |                     | gene.scaffold_16.g47.t1  | OG0001137    | 431251..442478       |

**Genes in syntenic blocks Figure 6C, b**

| Hd scaffold | Position in scaffold | Hd gene ID | Orthogroup # | Best Blast hit                                                                                         | Expect              | Cs gene                  | Orthogroup # | Position in scaffold |
|-------------|----------------------|------------|--------------|--------------------------------------------------------------------------------------------------------|---------------------|--------------------------|--------------|----------------------|
| scaffold351 | 2570811..2574280     | HD010552   | OG0006536    | gi 970890219 ref XP_015110360.1 PREDICTED: GPI mannosyltransferase 4 [Diachasma alloemum]              | Expect = 6.400e-248 | gene.scaffold_16.g210.t1 | OG0006536    | 2319748..2322545     |
| scaffold351 | 2575688..2584750     | HD010553   | OG0000820    | gi 1000729971 ref XP_015587409.1 histone deacetylase 6 isoform X3 [Cephus cinctus]                     | Expect = 0.000e+0   | gene.scaffold_16.g211.t1 | OG0000820    | 2323661..2331643     |
| scaffold351 | 2585486..2590674     | HD010554   | OG0008529    | gi 1000729989 ref XP_015587415.1 mitochondrial intermediate peptidase isoform X1 [Cephus cinctus]      | Expect = 1.300e-309 | gene.scaffold_16.g212.t1 | OG0008529    | 2333001..2336567     |
| scaffold351 | 2592030..2601204     | HD010555   | OG0005613    | gi 755986949 ref XP_011311356.1 PREDICTED: cullin-4A [Fopius arisanus]                                 | Expect = 0.000e+0   | gene.scaffold_16.g213.t1 | OG0005613    | 2338026..2342787     |
| scaffold351 | 2603266..2606649     | HD010556   | OG0007486    | gi 1000718247 ref XP_015598324.1 protein crooked neck [Cephus cinctus]                                 | Expect = 1.700e-240 | gene.scaffold_16.g214.t1 | OG0007486    | 2344137..2346984     |
|             |                      |            |              |                                                                                                        |                     | gene.scaffold_16.g216.t1 | orphan       | 2352827..2353396     |
| scaffold351 | 2614497..2669283     | HD010557   | OG0000315    | gi 1059231176 ref XP_017760895.1 PREDICTED: nuclear factor 1 X-type-like isoform X7 [Eufriesea mexi    | Expect = 0.000e+0   | gene.scaffold_16.g218.t1 | OG0000315    | 2360992..2364340     |
|             |                      |            |              |                                                                                                        |                     | gene.scaffold_16.g219.t1 | OG0000315    | 2373432..2374064     |
|             |                      |            |              |                                                                                                        |                     | gene.scaffold_16.g220.t1 | OG0000315    | 2387249..2388404     |
| scaffold351 | 2678768..2680678     | HD010558   | OG0007969    | gi 755943768 ref XP_011299232.1 PREDICTED: actin-related protein 2/3 complex subunit 4 [Fopius ari     | Expect = 5.700e-81  | gene.scaffold_16.g221.t1 | OG0007969    | 2416191..2419469     |
| scaffold351 | 2683737..2685050     | HD010559   | orphan       | N1_Hd18                                                                                                |                     | gene.scaffold_16.g223.t1 | OG0010684    | 2424942..2425688     |
|             |                      |            |              |                                                                                                        |                     | gene.scaffold_16.g564.t1 | orphan       | 2426081..2426764     |
|             |                      |            |              |                                                                                                        |                     | gene.scaffold_16.g224.t1 | orphan       | 2427951..2428691     |
| scaffold351 | 2688803..2689573     | HD010560   | OG0005107    | gi 972178531 ref XP_015191350.1 PREDICTED: transmembrane protein 45B-like [Polistes dominula]          | Expect = 3.600e-95  | gene.scaffold_16.g225.t1 | OG0005107    | 2430738..2431508     |
| scaffold351 | 2690793..2699707     | HD010561   | OG0003436    | gi 820860113 ref XP_003697297.2 PREDICTED: LOW QUALITY PROTEIN: enhancer of mRNA-decapping             | Expect = 0.000e+0   | NA                       |              |                      |
| scaffold351 | 2700580..2701786     | HD010562   | OG0007575    | gi 1227092722 gb OXU18804.1  hypothetical protein TSAR_005200 [Trichomalopsis sarcophagae]             | Expect = 3.400e-82  | NA                       |              |                      |
| scaffold351 | 2706953..2708212     | HD010563   | OG0009633    | gi 1580172942 ref XP_028048451.1 uncharacterized protein LOC114255006 [Monomorium pharaonis]           | Expect = 1.100e-29  | NA                       |              |                      |
| scaffold351 | 2712014..2713607     | HD010564   | OG0000118    | gi 795032310 ref XP_011863894.1 PREDICTED: speckle-type POZ protein A-like [Vollenhovia emeryi]        | Expect = 6.600e-20  | NA                       |              |                      |
| scaffold351 | 2714791..2716848     | HD010565   | OG0005178    | gi 1000730046 ref XP_015587445.1 actin-related protein 10 [Cephus cinctus]                             | Expect = 2.800e-165 | gene.scaffold_16.g124.t1 | OG0005178    | 1439439..1441701     |
| scaffold351 | 2717065..2719279     | HD010566   | OG0008078    | gi 817195095 ref XP_012273078.1 eukaryotic translation initiation factor 3 subunit F [Orussus abietinu | Expect = 4.500e-139 | gene.scaffold_16.g125.t1 | OG0008078    | 1441946..1443651     |
| scaffold351 | 2720235..2740116     | HD010567   | OG0000165    | gi 915666462 gb KOC68367.1  Phosphatidylinositol 4-phosphate 5-kinase type-1 alpha [Habropod           | Expect = 0.000e+0   | gene.scaffold_16.g126.t1 | OG0000165    | 1444610..1449264     |
| scaffold351 | 2744556..2745842     | HD010568   | OG0000280    | gi 998499361 ref XP_015509568.1 PREDICTED: venom peptide isomerase heavy chain-like [Neodiprion        | Expect = 5.200e-119 | gene.scaffold_16.g129.t1 | OG0000280    | 1468965..1476057     |
| scaffold351 | 2746325..2748699     | HD010569   | OG0010371    | no hit                                                                                                 |                     |                          |              |                      |
| scaffold351 | 2749640..2750960     | HD010570   | OG0010371    | no hit                                                                                                 |                     |                          |              |                      |
| scaffold351 | 2754546..2756977     | HD010571   | OG0000280    | gi 755977086 ref XP_011308165.1 PREDICTED: trypsin-like [Fopius arisanus]                              | Expect = 1.600e-80  | gene.scaffold_16.g130.t1 | OG0000280    | 1479694..1481353     |

|             |                  |          |           |                                                                                      |                     |                          |           |                  |
|-------------|------------------|----------|-----------|--------------------------------------------------------------------------------------|---------------------|--------------------------|-----------|------------------|
| scaffold351 | 2757727..2759955 | HD010572 | OG0000280 | gi 755977086 ref XP_011308165.1 PREDICTED: trypsin-like [Fopius arisanus]            | Expect = 2.500e-81  | gene.scaffold_16.g131.t1 | OG0000280 | 1482054..1483447 |
| scaffold351 | 2760364..2762511 | HD010573 | OG0000280 | gi 755977083 ref XP_011308164.1 PREDICTED: trypsin II-P29-like [Fopius arisanus]     | Expect = 4.300e-75  | gene.scaffold_16.g132.t1 | OG0000280 | 1484135..1488423 |
| scaffold351 | 2765019..2770447 | HD010574 | OG0008378 | gi 755977080 ref XP_011308163.1 PREDICTED: carboxypeptidase B-like [Fopius arisanus] | Expect = 8.000e-215 | gene.scaffold_16.g133.t1 | OG0008378 | 1489809..1493726 |

**Genes in synteny blocks Figure 6C, c**

| Hd scaffold | Position in scaffold | Hd gene ID | Orthogroup # | Best Blast hit                                                                                                         |                     | Cs gene                  | Orthogroup # | Position in scaffold |
|-------------|----------------------|------------|--------------|------------------------------------------------------------------------------------------------------------------------|---------------------|--------------------------|--------------|----------------------|
|             |                      | NA         |              |                                                                                                                        |                     | gene.scaffold_5890.g33.  | OG0000028    | 162272..162676       |
|             |                      | NA         |              |                                                                                                                        |                     | gene.scaffold_5890.g32.  | OG0000021    | 161726..162136       |
|             |                      | NA         |              |                                                                                                                        |                     | gene.scaffold_5890.g31.  | OG0000024    | 156325..156699       |
|             |                      | NA         |              |                                                                                                                        |                     | gene.scaffold_5890.g30.  | orphan       | 151548..155209       |
|             |                      | NA         |              |                                                                                                                        |                     | gene.scaffold_5890.g29.  | OG0000024    | 151509..151883       |
|             |                      | NA         |              |                                                                                                                        |                     | gene.scaffold_5890.g28.  | OG0002056    | 146321..147118       |
|             |                      | NA         |              |                                                                                                                        |                     | ///                      |              |                      |
|             |                      | NA         |              |                                                                                                                        |                     | gene.scaffold_5890.g59e  | OG0002056    | 134843..135562       |
| scaffold351 | 2270991..2271302     | HD010503   | OG0000028    | gi 170058994 ref XP_001865168.1 histone 1 [Culex quinquefasciatus]                                                     | Expect = 3.900e-48  |                          |              |                      |
| scaffold351 | 2273424..2278678     | HD010504   | OG0003636    | gi 1000742598 ref XP_015593950.1 equilibrative nucleoside transporter 4 [Cephus cinctus]                               | Expect = 1.500e-267 | gene.scaffold_5890.g22.  | OG0003636    | 128010..132737       |
| scaffold351 | 2280628..2284708     | HD010505   | OG0001788    | gi 954555894 ref XP_014601533.1 PREDICTED: serine/threonine-protein kinase ICK [Polistes canadensis]                   | Expect = 3.200e-256 | gene.scaffold_5890.g20.  | OG0001788    | 120284..125583       |
| scaffold351 | 2288342..2289300     | HD010506   | orphan       | no hit                                                                                                                 |                     | gene.scaffold_5890.g18.  | OG0000067    | 111355..111939       |
| scaffold351 | 2292636..2299704     | HD010507   | OG0001161    | gi 970889125 ref XP_015109758.1 PREDICTED: DENN domain-containing protein 1A-like isoform X1 [Drosophila melanogaster] | Expect = 0.000e+0   | gene.scaffold_5890.g17.  | OG0001161    | 101367..109432       |
| scaffold351 | 2300822..2301232     | HD010508   | OG0000021    | gi 170053440 ref XP_001862674.1 histone H3 type 2 [Culex quinquefasciatus]                                             | Expect = 3.000e-64  | gene.scaffold_5890.g16.  | OG0000021    | 97954..100617        |
| scaffold351 | 2302839..2303213     | HD010509   | OG0000024    | gi 815814502 ref XP_012228276.1 PREDICTED: histone H2A-like [Linepithema humile]                                       | Expect = 1.700e-58  |                          |              |                      |
| scaffold351 | 2304346..2305863     | HD010510   | OG0008873    | gi 1000757495 ref XP_015601701.1 activator of basal transcription 1 isoform X2 [Cephus cinctus]                        | Expect = 1.900e-83  |                          |              |                      |
| scaffold351 | 2306413..2308908     | HD010511   | OG0004415    | gi 307203421 gb EFN82496.1  mRNA-decapping enzyme 2 [Harpegnathos saltator]                                            | Expect = 1.000e-159 | gene.scaffold_5890.g15.  | OG0004415    | 95411..97479         |
| scaffold351 | 2310086..2311637     | HD010512   | OG0007967    | gi 954580551 ref XP_014614868.1 PREDICTED: heme oxygenase 1 [Polistes canadensis]                                      | Expect = 3.300e-93  |                          |              |                      |
| scaffold351 | 2312957..2318568     | HD010513   | OG0006585    | gi 1000715934 ref XP_015586052.1 peroxisomal multifunctional enzyme type 2 isoform X1 [Cephus cinctus]                 | Expect = 2.200e-259 | gene.scaffold_5890.g14.  | OG0006585    | 86991..95435         |
| scaffold351 | 2320285..2328116     | HD010514   | OG0002518    | gi 1000757483 ref XP_015601693.1 hypoxia up-regulated protein 1 isoform X1 [Cephus cinctus]                            | Expect = 1.000e-304 | gene.scaffold_5890.g13.  | OG0002518    | 79568..85710         |
| scaffold351 | 2329743..2330387     | HD010515   | orphan       | Rep5_Hd17                                                                                                              |                     |                          |              |                      |
| scaffold351 | ///                  |            |              |                                                                                                                        |                     |                          |              |                      |
| scaffold351 | 2335459..2336166     | HD010519   | orphan       | Rep1_Hd17                                                                                                              |                     |                          |              |                      |
| scaffold351 | 2336786..2337193     | HD010520   | orphan       | rep partial_Hd17                                                                                                       |                     |                          |              |                      |
| scaffold351 | 2337418..2340007     | HD010521   | OG0002835    | gi 808129402 ref XP_012167532.1 WW domain-binding protein 2 isoform X1 [Bombus terrestris]                             | Expect = 2.300e-101 | gene.scaffold_5890.g12.  | OG0002835    | 76069..78711         |
| scaffold351 | 2345118..2346993     | HD010522   | OG0006513    | gi 1227095170 gb OXU20342.1  hypothetical protein TSAR_005800 [Trichomalopsis sarcophagae]                             | Expect = 1.500e-104 | gene.scaffold_5890.g11.  | OG0006513    | 69897..70791         |
| scaffold351 | 2349858..2352634     | HD010523   | OG0007554    | gi 1059880711 ref XP_017795737.1 PREDICTED: ubiquitin domain-containing protein UBFD1-like [Habrobracon hebetor]       | Expect = 2.500e-105 | gene.scaffold_5890.g10.  | OG0007554    | 63578..65852         |
| scaffold351 | 2353611..2362101     | HD010524   | OG0003626    | gi 970912543 ref XP_015122543.1 PREDICTED: polycomb protein suz12-B [Diachasma alloeum]                                | Expect = 0.000e+0   | gene.scaffold_5890.g9.t1 | OG0003626    | 55732..62546         |
| scaffold351 | 2363619..2368282     | HD010525   | OG0004797    | gi 1000730147 ref XP_015587495.1 methyltransferase-like protein 22 [Cephus cinctus]                                    | Expect = 5.700e-92  | gene.scaffold_5890.g8.t1 | OG0004797    | 51570..54218         |
| scaffold351 | 2368680..2372470     | HD010526   | OG0006517    | gi 1476364581 gb AXY94695.1  disulfide-isomerase [Habrobracon hebetor]                                                 | Expect = 1.100e-196 | gene.scaffold_5890.g7.t1 | OG0006517    | 44960..49478         |

**Genes in synteny blocks Figure 7C, a**

| Hd scaffold | Position in scaffold | Hd gene ID | Orthogroup # | Best Blast hit                                                                                                                     |                     | Cs gene                  | Orthogroup # | Position in scaffold |
|-------------|----------------------|------------|--------------|------------------------------------------------------------------------------------------------------------------------------------|---------------------|--------------------------|--------------|----------------------|
| Scaffold 91 | 339180-342661        | HD016092   | OG0004987    | gi 780657091 ref XP_011691874.1 PREDICTED: solute carrier organic anion transporter family member 5A1 isoform X1 [Fopius arisanus] | Expect = 1.400e-275 | gene.scaffold_14.g96.t1  | OG0004987    | 672138..680445       |
| Scaffold 91 | 370839-379409        | HD016093   | OG0004824    | gi 769843355 ref XP_011632893.1 solute carrier organic anion transporter family member 5A1 isoform X1 [Fopius arisanus]            | Expect = 0.000e+0   | gene.scaffold_14.g97.t1  | OG0004824    | 687109..693641       |
| Scaffold 91 | 386420-391295        | HD016094   | OG0004411    | gi 755943227 ref XP_011299047.1 PREDICTED: G-protein coupled receptor Mth isoform X2 [Fopius arisanus]                             | Expect = 9.200e-139 | gene.scaffold_14.g98.t1  | orphan       | 691335..692107       |
| Scaffold 91 | 392450-394130        | HD016095   | OG0001577    | gi 1492480063 ref XP_026674315.1 probable RNA methyltransferase CG11342 isoform X1 [Ceratina californica]                          | Expect = 5.800e-72  | gene.scaffold_14.g99.t1  | OG0001577    | 701142..708415       |
| Scaffold 91 | 396109-397563        | HD016096   | OG0001965    | gi 749787677 ref XP_011147350.1 myosin-2 essential light chain isoform X2 [Harpegnathos saltator]                                  | Expect = 3.300e-77  | gene.scaffold_14.g100.t1 | OG0001965    | 709518..710732       |
| Scaffold 91 | 398929-404614        | HD016097   | OG0004676    | gi 972210109 ref XP_015187432.1 PREDICTED: WDR repeat, SAM and U-box domain-containing protein [Habrobracon hebetor]               | Expect = 2.500e-298 | gene.scaffold_14.g101.t1 | OG0004676    | 713039..718640       |
| Scaffold 91 | 406627-407543        | HD016098   | OG0007680    | gi 817183740 ref XP_012278017.1 GATA zinc finger domain-containing protein 1 isoform X2 [Orussus cinctus]                          | Expect = 1.600e-105 | gene.scaffold_14.g102.t1 | OG0007680    | 720734..721681       |
| Scaffold 91 | 408455-411290        | HD016099   | OG0005425    | gi 48142301 ref XP_397320.1  AP-3 complex subunit sigma-2 isoform X1 [Apis mellifera]                                              | Expect = 8.100e-92  | gene.scaffold_14.g103.t1 | OG0005425    | 722419..724763       |
| Scaffold 91 | 412851-415250        | HD016100   | OG0001553    | gi 383857701 ref XP_003704342.1 PREDICTED: beta-1,3-galactosyltransferase 1-like isoform X2 [Megaselia scalaris]                   | Expect = 3.200e-143 | NA                       |              |                      |
| Scaffold 91 | 418638-419902        | HD016101   | OG0008604    | gi 345486223 ref XP_003425426.1 PREDICTED: G patch domain-containing protein 4-like [Nasonia vitriicola]                           | Expect = 1.400e-47  | NA                       |              |                      |
| Scaffold 91 | 420807-422918        | HD016102   | OG0004778    | gi 970907664 ref XP_015119881.1 PREDICTED: type 2 phosphatidylinositol 4,5-bisphosphate 4-phosphatase [Habrobracon hebetor]        | Expect = 7.800e-127 | NA                       |              |                      |
| Scaffold 91 | 425105..426659       | HD016103   | orphan       | no hit                                                                                                                             |                     | NA                       |              |                      |
| Scaffold 91 | 427639..428218       | HD016104   | orphan       | no hit                                                                                                                             |                     | NA                       |              |                      |
| Scaffold 91 | 429397..431144       | HD016105   | orphan       | no hit                                                                                                                             |                     | NA                       |              |                      |

|             |                |          |           |                                                                                                      |                                                       |                                                   |
|-------------|----------------|----------|-----------|------------------------------------------------------------------------------------------------------|-------------------------------------------------------|---------------------------------------------------|
| Scaffold 91 | 433475..434375 | HD016106 | orphan    | no hit                                                                                               |                                                       | NA                                                |
| Scaffold 91 | 435700..436543 | HD016107 | orphan    | no hit                                                                                               |                                                       | NA                                                |
| Scaffold 91 | 437892..438750 | HD016108 | orphan    | no hit                                                                                               |                                                       | NA                                                |
| Scaffold 91 | 440012..441810 | HD016109 | orphan    | no hit                                                                                               |                                                       | NA                                                |
| Scaffold 91 | 443803..449675 | HD016110 | orphan    | no hit                                                                                               |                                                       | NA                                                |
| Scaffold 91 | 450623..452672 | HD016111 | OG0005467 | gi 987911334 ref XP_015431390.1 PREDICTED: DNA repair protein XRCC1 [Dufourea novaengliae]           | Expect = 5.400e-86                                    | NA                                                |
| Scaffold 91 | 453857..454591 | HD016112 | orphan    | IVSP_U1                                                                                              |                                                       | NA                                                |
| Scaffold 91 | ///            |          |           |                                                                                                      |                                                       | NA                                                |
| Scaffold 91 | 467172..467876 | HD016611 | orphan    | IVSP_U25                                                                                             |                                                       | NA                                                |
| Scaffold 91 | 467893..468866 | HD016610 | OG0008504 | no hit                                                                                               |                                                       | NA                                                |
| Scaffold 91 | 470135..471607 | HD016121 | orphan    | N-gene1_Hd15                                                                                         |                                                       | NA                                                |
| Scaffold 91 | 474019..474459 | HD016122 | orphan    | no hit                                                                                               |                                                       | NA                                                |
| Scaffold 91 | 475549..482783 | HD016123 | OG0008504 | gi 1000724119 ref XP_015610535.1 uncharacterized protein LOC107275188 isoform X2 [Cephus cinctus]    | Expect = 2.200e-140                                   | gene.scaffold_50.g34.t1. OG0008504 228808..236437 |
| Scaffold 91 | 485760..486020 | HD016616 | orphan    | U1_Hd33                                                                                              |                                                       |                                                   |
| Scaffold 91 | 487963..488427 | HD016613 | orphan    | U2_Hd33                                                                                              |                                                       |                                                   |
| Scaffold 91 | 487593..496279 | HD016124 | OG0008877 | gi 1573754945 ref XP_028042060.1 inter-alpha-trypsin inhibitor heavy chain H4-like [Bombyx mandarin] | Expect = 1.400e-43                                    | gene.scaffold_50.g35.t1 OG0008877 239447..245088  |
| Scaffold 91 | 496775..497693 | HD016125 | OG0008877 | gi 1185578680 ref XP_020720113.1 uncharacterized protein LOC100648520 [Bombus terrestris]            | Expect = 2.200e-27                                    |                                                   |
| Scaffold 91 | 498816..502616 | HD016126 | OG0007035 | gi 817052951 ref XP_012259318.1 tetratricopeptide repeat protein 27 [Athalia rosae]                  | Expect = 4.100e-262                                   | gene.scaffold_50.g36.t1 OG0007035 245526..250163  |
| Scaffold 91 | 503255..504795 | HD016127 | orphan    | no hit                                                                                               |                                                       | gene.scaffold_50.g37.t1 orphan 250869..252609     |
| Scaffold 91 | 506500..510737 | HD016128 | OG0008077 | gi 970916129 ref XP_015124492.1 PREDICTED: uncharacterized protein LOC107046395 [Diachasma all       | Expect = 3.700e-255                                   | gene.scaffold_50.g38.t1 OG0008077 253612..257408  |
| Scaffold 91 | 512122..516356 | HD016129 | OG0004493 | gi 1061111877 ref XP_017881969.1 uridine-cytidine kinase-like 1 [Ceratina calcarata]                 | Expect = 1.600e-268                                   | gene.scaffold_50.g39.t1 OG0004493 258014..261162  |
| Scaffold 91 | 517628..518212 | HD016130 | OG0002787 | gi 665791319 ref XP_008543211.1 PREDICTED: inosine triphosphate pyrophosphatase [Microplitis den     | Expect = 2.700e-82                                    | gene.scaffold_50.g40.t1 OG0002787 262054..262638  |
| Scaffold 91 | 521509..534951 | HD016131 | OG0003558 | gi 665791317 ref XP_008543209.1 PREDICTED: uncharacterized protein LOC103568231 [Microplitis de      | Expect = 0.000e+0                                     | NA                                                |
| Scaffold 91 | 536918..537427 | HD016132 | OG0000328 | Vank1_Hd24                                                                                           |                                                       | NA                                                |
| Scaffold 91 | 538200..539270 | HD016133 | OG0010755 | Vinx1_Hd24                                                                                           |                                                       | NA                                                |
| Scaffold 91 | 541304..542734 | HD016134 | orphan    | Ngene-4                                                                                              |                                                       | NA                                                |
| Scaffold 91 | ///            |          |           |                                                                                                      |                                                       | NA                                                |
| Scaffold 91 | 567663..567944 | HD016614 | orphan    | Ngene-3                                                                                              |                                                       | NA                                                |
| Scaffold 91 | 573680..574969 | HD016150 | orphan    | N1_Hd29                                                                                              |                                                       | NA                                                |
| Scaffold 91 | 579785..581438 | HD016151 | OG0001925 | gi 1000751647 ref XP_015598681.1 protein l(2)37Cc [Cephus cinctus]                                   | >gi 1000751649 ref XP_015598681.1 Expect = 7.900e-133 | NA                                                |
| Scaffold 91 | 583666..596697 | HD016152 | OG0000557 | gi 970889107 ref XP_015109747.1 PREDICTED: myosin-VIIa-like [Diachasma alloeuum]                     | Expect = 0.000e+0                                     | NA                                                |
| Scaffold 91 | 733490..737430 | HD016153 | OG0002720 | gi 1061140064 ref XP_017893504.1 transcription factor Sox-2 isoform X1 [Ceratina calcarata]          | Expect = 3.700e-147                                   | NA                                                |

#### Genes in synteny blocks Figure 7C, b

| Hd scaffold   | Position in scaffold | Hd gene ID | Orthogroup # | Best Blast hit                                                                                      | Expect              | Cs gene                   | Orthogroup # | Position in scaffold |
|---------------|----------------------|------------|--------------|-----------------------------------------------------------------------------------------------------|---------------------|---------------------------|--------------|----------------------|
| Scaffold 1275 | 5695132..5698339     | HD001703   | OG0002287    | gi 1615708828 gb TGZ38293.1  Uncharacterized protein DBV15_00393, partial [Temnothorax longi]       | Expect = 1.200e-89  | gene.scaffold_134.g10.t1  | OG0002287    | 124421..126230       |
| Scaffold 1275 | 5698820..5699218     | HD001704   | OG0007747    | gi 817198610 ref XP_012274957.1 proteasome assembly chaperone 4 isoform X1 [Orussus abietinus]      | Expect = 8.200e-35  | gene.scaffold_134.g11.t1  | OG0007747    | 128625..129023       |
| Scaffold 1275 | 5700119..5709232     | HD001705   | OG0007746    | gi 1000763707 ref XP_015604930.1 midasin [Cephus cinctus]                                           | Expect = 0.000e+0   | gene.scaffold_134.g12.t1  | OG0007746    | 129973..143060       |
| Scaffold 1275 | 5715296..5722376     | HD001706   | OG0005758    | gi 1000763721 ref XP_015604938.1 uncharacterized protein LOC107272369 isoform X1 [Cephus cinctus]   | Expect = 6.200e-245 | gene.scaffold_134.g13.t1  | OG0005758    | 142507..148607       |
| Scaffold 1275 | 5745780..5748027     | HD001707   | orphan       | no hit                                                                                              |                     | NA                        |              |                      |
| Scaffold 1275 | 5789342..5804341     | HD001708   | OG0010542    | gi 1000763707 ref XP_015604930.1 midasin [Cephus cinctus]                                           | Expect = 0.000e+0   | gene.scaffold_6042.g1.t1  | OG0010542    | 7898..20048          |
| Scaffold 1275 | 5804928..5806155     | HD001709   | OG0008637    | gi 817050671 ref XP_012269284.1 28S ribosomal protein S15, mitochondrial [Athalia rosae]            | Expect = 3.900e-66  | gene.scaffold_6042.g3.t1  | OG0008637    | 20431..21692         |
| Scaffold 1275 | 5806461..5808045     | HD001710   | OG0008638    | gi 1000725354 ref XP_015585242.1 protein AATF [Cephus cinctus]                                      | Expect = 1.900e-132 | gene.scaffold_6042.g4.t1  | OG0008638    | 22007..23884         |
| Scaffold 1275 | 5809242..5809907     | HD016565   | orphan       | Rep1_Hd6                                                                                            |                     |                           |              |                      |
| Scaffold 1275 | ///                  |            |              |                                                                                                     |                     | gene.scaffold_6042.g5.t1  | OG0000017    | 38407..41846         |
| Scaffold 1275 | 5818232..5818829     | HD016570   | orphan       | U1.2_Hd6                                                                                            |                     |                           |              |                      |
| Scaffold 1275 | 5853342..5855008     | HD001713   | OG0000907    | gi 954550203 ref XP_014598460.1 PREDICTED: fibrillin-1-like [Polistes canadensis]                   | Expect = 2.700e-10  |                           |              |                      |
| Scaffold 1275 | 5859163..5862434     | HD001714   | OG0000759    | gi 766921548 ref XP_011505297.1 PREDICTED: major royal jelly protein 1-like isoform X1 [Ceratosolen | Expect = 8.700e-75  | gene.scaffold_6042.g6.t1  | OG0000759    | 56163..59912         |
| Scaffold 1275 | 5868688..5896004     | HD001715   | OG0000907    | gi 1477752320 ref XP_006561358.2 fibrillin-2 isoform X1 [Apis mellifera]                            | Expect = 1.000e-135 | gene.scaffold_6042.g7.t1  | OG0000907    | 67573..82296         |
|               |                      |            |              |                                                                                                     |                     | gene.scaffold_6042.g8.t1  | OG0000907    | 84612..89146         |
| Scaffold 1275 | 5899594..5902437     | HD001716   | OG0008827    | gi 925679321 gb KOX76257.1  hypothetical protein WN51_11586 [Melipona quadrifasciata]               | Expect = 1.300e-41  | gene.scaffold_6042.g9.t1  | OG0008827    | 95154..98396         |
| Scaffold 1275 | 5907509..5931751     | HD001717   | OG0000907    | gi 951521230 ref XP_014484382.1 PREDICTED: uncharacterized protein LOC106749449 isoform X1 [Di      | Expect = 1.400e-276 | gene.scaffold_6042.g11.t1 | OG0000907    | 102320..114213       |
| Scaffold 1275 | 5934850..5939667     | HD001718   | OG0003835    | gi 936686298 ref XP_014221120.1 protein henna isoform X1 [Trichogramma pretiosum]                   | Expect = 8.800e-249 | gene.scaffold_6042.g12.t1 | OG0003835    | 131205..134233       |

|                                |          |           |                                  |                                                                      |                                                                      |
|--------------------------------|----------|-----------|----------------------------------|----------------------------------------------------------------------|----------------------------------------------------------------------|
| Scaffold 1275 5941301..5941799 | HD001719 | orphan    | no hit                           |                                                                      | NA                                                                   |
| Scaffold 1275 5941600..5943451 | HD001720 | orphan    | GlyPro1_Hd2                      |                                                                      | NA                                                                   |
| Scaffold 1275 ///              |          |           |                                  |                                                                      | NA                                                                   |
| Scaffold 1275 5952553..5953461 | HD016569 | orphan    | SerThr_Hd2                       |                                                                      | NA                                                                   |
| Scaffold 1275 5954908..5957857 | HD001723 | OG0008292 | gi 970914653 ref XP_015123688.1  | PREDICTED: vacuolar fusion protein MON1 homolog A [Diachasma         | Expect = 1.500e-249 NA                                               |
| Scaffold 1275 5958966..5960611 | HD001724 | OG0008989 | gi 1000737514 ref XP_015591270.1 | pre-mRNA-splicing factor 38 isoform X1 [Cephus cinctus]              | Expect = 7.300e-111 NA                                               |
| Scaffold 1275 5963322..5967084 | HD001725 | OG0006130 | gi 665789861 ref XP_008560590.1  | PREDICTED: lipoma HMGIC fusion partner-like 3 protein [Microplitis   | Expect = 1.500e-148 NA                                               |
| Scaffold 1275 5970045..5989460 | HD001726 | OG0003941 | gi 1000737447 ref XP_015591233.1 | paired box pox-neuro protein isoform X2 [Cephus cinctus]             | Expect = 3.600e-166 NA                                               |
| Scaffold 1275 6031309..6031662 | HD001727 | orphan    | no hit                           |                                                                      | NA                                                                   |
| Scaffold 1275 6039464..6041203 | HD001728 | OG0008922 | no hit                           |                                                                      | NA                                                                   |
| Scaffold 1275 6047894..6053795 | HD001729 | OG0004544 | gi 970914023 ref XP_015123344.1  | PREDICTED: neither inactivation nor afterpotential protein G-like [D | Expect = 1.100e-201 NA                                               |
| Scaffold 1275 6055912..6056223 | HD001730 | orphan    | no hit                           |                                                                      | gene.scaffold_12.g37.t1 orphan 313226..314796                        |
| Scaffold 1275 6065301..6068372 | HD001731 | orphan    | U1_Hd7                           |                                                                      | gene.scaffold_12.g36.t1 orphan 269465..272474                        |
| Scaffold 1275 6163755..6209923 | HD001732 | OG0001182 | gi 665784719 ref XP_008543429.1  | PREDICTED: zinc finger protein 608-like [Microplitis demolitor]      | Expect = 8.000e-240 gene.scaffold_12.g35.t1 OG0001182 266509..281996 |
| Scaffold 1275 6215883..6220739 | HD001733 | OG0009154 | gi 665785226 ref XP_008546042.1  | PREDICTED: focadhesin [Microplitis demolitor]                        | Expect = 3.500e-300 gene.scaffold_12.g34.t1 OG0009154 254503..262293 |
| Scaffold 1275 6223570..6225534 | HD001734 | OG0005749 | gi 759044886 ref XP_011331377.1  | uncharacterized protein C1orf43 homolog [Ooceraea biroi]             | Expect = 6.200e-121 gene.scaffold_12.g33.t1 OG0005749 246626..248241 |
| Scaffold 1275 6233178..6236130 | HD001735 | orphan    | gi 815899824 ref XP_012236112.1  | RNA polymerase II elongation factor EII [Bombus impatiens]           | Expect = 2.200e-20                                                   |
| Scaffold 1275 6237301..6258275 | HD001736 | OG0001096 | gi 1000725348 ref XP_015585239.1 | NGFI-A-binding protein homolog isoform X1 [Cephus cinctus]           | Expect = 1.200e-181 gene.scaffold_12.g32.t1 OG0001096 233201..241710 |
| Scaffold 1275 6262652..6270854 | HD001737 | OG0001213 | gi 817221046 ref XP_012286061.1  | girdin isoform X1 [Orussus abietinus]                                | Expect = 4.100e-256 gene.scaffold_12.g30.t1 OG0001213 210669..216809 |
| Scaffold 1275 6273273..6277538 | HD001738 | OG0000750 | gi 970914033 ref XP_015123349.1  | PREDICTED: E3 ubiquitin-protein ligase RNF126 [Diachasma alloeu      | Expect = 5.100e-91 NA                                                |
| Scaffold 1275 6295663..6305891 | HD001739 | OG0001026 | gi 805820120 ref XP_003707425.2  | PREDICTED: monocarboxylate transporter 10-like isoform X2 [Mega      | Expect = 4.400e-278 NA                                               |
| Scaffold 1275 6326868..6327170 | HD001740 | orphan    | no hit                           |                                                                      | NA                                                                   |
| Scaffold 1275 6327762..6333610 | HD001741 | OG0001259 | gi 755965602 ref XP_011305227.1  | PREDICTED: uncharacterized protein LOC105267814 [Fopius arisan       | Expect = 3.100e-204 NA                                               |
| Scaffold 1275 6336069..6336941 | HD001742 | OG0008975 | gi 826447337 ref XP_012531547.1  | cytochrome c oxidase assembly factor 5 [Monomorium pharaonis]        | Expect = 9.100e-32 NA                                                |
| Scaffold 1275 6337655..6338948 | HD001743 | OG0007279 | gi 970893534 ref XP_015112156.1  | PREDICTED: lysM and putative peptidoglycan-binding domain-cont       | Expect = 1.000e-66 NA                                                |
| Scaffold 1275 ///              |          |           |                                  |                                                                      |                                                                      |
| Scaffold 1275 6498766..6500773 | HD001752 | OG0001027 | gi 1059871709 ref XP_017790766.1 | PREDICTED: uncharacterized protein LOC108572935 [Habropoda la        | Expect = 1.300e-295 gene.scaffold_57.g37.t1 OG0001027 701460..703459 |
| Scaffold 1275 6525619..6535728 | HD001753 | OG0008714 | gi 1000769997 ref XP_015608184.1 | zwei Ig domain protein zig-8 isoform X1 [Cephus cinctus]             | Expect = 1.300e-115 gene.scaffold_57.g35.t1 OG0008714 673695..676530 |
| Scaffold 1275 6576893..6577922 | HD001754 | orphan    | no hit                           |                                                                      | gene.scaffold_57.g34.t1 OG0008714 667397..668577                     |
| Scaffold 1275 6589791..6590075 | HD001755 | orphan    | no hit                           |                                                                      |                                                                      |
| Scaffold 1275 6609826..6610452 | HD001756 | OG0010758 | no hit                           |                                                                      |                                                                      |
| Scaffold 1275 6654784..6656225 | HD001757 | OG0010662 | no hit                           |                                                                      |                                                                      |
| Scaffold 1275 6674792..6680997 | HD001758 | OG0010538 | gi 817211154 ref XP_012281702.1  | uncharacterized protein LOC105700447 [Orussus abietinus]             | Expect = 4.400e-177 gene.scaffold_57.g33.t1 OG0010538 549863..558077 |
| Scaffold 1275 6687225..6691596 | HD001759 | OG0000577 | gi 665815849 ref XP_008556602.1  | PREDICTED: acylcarnitine hydrolase-like [Microplitis demolitor]      | Expect = 1.100e-123 gene.scaffold_57.g32.t1 OG0000577 527847..544092 |
| Scaffold 1275 6694467..6698473 | HD001760 | OG0000577 | gi 665815849 ref XP_008556602.1  | PREDICTED: acylcarnitine hydrolase-like [Microplitis demolitor]      | Expect = 2.300e-118                                                  |
| Scaffold 1275 6713912..6715341 | HD001761 | OG0010178 | gi 954544039 ref XP_014610010.1  | PREDICTED: UPF0602 protein C4orf47 homolog [Polistes canadensi       | Expect = 2.700e-76 gene.scaffold_57.g31.t1 OG0010178 512556..513765  |
| Scaffold 1275 6755517..6755963 | HD001762 | orphan    | no hit                           |                                                                      | gene.scaffold_57.g29.t1 orphan 480378..482423                        |
| Scaffold 1275 6788558..6789189 | HD001763 | OG0000376 | gi 998503073 ref XP_015511626.1  | PREDICTED: uncharacterized protein LOC107218308 [Neodiprion le       | Expect = 2.500e-25 gene.scaffold_57.g28.t1 OG0000376 445783..447418  |
| Scaffold 127548                |          |           |                                  |                                                                      | gene.scaffold_57.g27.t1 orphan 394294..400573                        |
| Scaffold 1275 6832835..6833713 | HD001764 | orphan    | IVSP_U29                         |                                                                      | gene.scaffold_57.g26.t1. orphan 391820..393241                       |
| Scaffold 1275 ///              |          |           |                                  |                                                                      | ///                                                                  |
| Scaffold 1275 6845548..6848464 | HD001769 | orphan    | IVSP_U34                         |                                                                      | gene.scaffold_57.g24.t1. orphan 383305..386526                       |
| Scaffold 1275 6856068..6858621 | HD001770 | OG0000376 | gi 755932577 ref XP_011314368.1  | PREDICTED: lachesin-like [Fopius arisanus]                           | Expect = 2.700e-25 gene.scaffold_57.g22.t1 OG0000376 370164..371046  |
| Scaffold 1275 6861330..6863003 | HD001771 | OG0001625 | gi 1070588568 ref XP_018406776.1 | PREDICTED: uncharacterized protein LOC108771307 [Cyphomyrme          | Expect = 1.500e-186                                                  |

#### Genes in synteny blocks Figure 7C, c

| Hd scaffold   | Position in scaffold | Hd gene ID | Orthogroup # | Best Blast hit                   | Cs gene                                                             | Orthogroup #        | Position in scaffold                             |
|---------------|----------------------|------------|--------------|----------------------------------|---------------------------------------------------------------------|---------------------|--------------------------------------------------|
| Scaffold 1275 | 10649612..1065171    | HD002066   | OG0004297    | gi 815768838 ref XP_012233244.1  | PREDICTED: caspase-3 isoform X1 [Linepithema humile]                | Expect = 2.800e-70  | gene.scaffold_12.g65.t1 OG0004297 668906..679965 |
| Scaffold 1275 | 10653145..1065624    | HD002067   | OG0009466    | gi 972201540 ref XP_015182858.1  | PREDICTED: sodium channel protein Nach-like isoform X1 [Polistes    | Expect = 6.900e-140 | gene.scaffold_12.g66.t1 OG0009466 681861..685155 |
| Scaffold 1275 | 10696314..1070282    | HD002068   | OG0002519    | gi 1389785382 ref XP_024946756.1 | uncharacterized protein LOC107273655 isoform X4 [Cephus cinctus     | Expect = 1.000e-157 | gene.scaffold_12.g67.t1 OG0002519 733521..738350 |
| Scaffold 1275 | 10713573..1071834    | HD002069   | OG0002011    | gi 817182955 ref XP_012273795.1  | coiled-coil and C2 domain-containing protein 1-like isoform X2 [Oru | Expect = 2.300e-247 | gene.scaffold_12.g68.t1 OG0002011 752453..758163 |
| Scaffold 1275 | 10718988..1072124    | HD002070   | OG0008538    | gi 817182522 ref XP_012271486.1  | V-type proton ATPase subunit d [Orussus abietinus]                  | Expect = 3.600e-199 | gene.scaffold_12.g70.t1 OG0008538 758815..760937 |
| Scaffold 1275 | 10721836..1072315    | HD002071   | OG0004841    | gi 817182518 ref XP_012271468.1  | probable tRNA(His) guanylyltransferase isoform X1 [Orussus abietir  | Expect = 2.500e-102 | gene.scaffold_12.g71.t1 OG0004841 761672..762420 |

|                                          |           |                                                                                                      |                     |                           |           |                |
|------------------------------------------|-----------|------------------------------------------------------------------------------------------------------|---------------------|---------------------------|-----------|----------------|
| Scaffold 1275 10723636..1072892:HD002072 | OG0002227 | gi 1000768710 ref XP_015607512.1 probable methyltransferase TARBP1 isoform X1 [Cephus cinctus]       | Expect = 8.500e-229 | gene.scaffold_6122.g8.t1  | OG0002227 | 84619..90498   |
| Scaffold 1275 10729352..1073001:HD002073 | OG0006556 | gi 970884085 ref XP_015126663.1 PREDICTED: ATP synthase subunit g, mitochondrial [Diachasma allo     | Expect = 9.800e-33  | gene.scaffold_6122.g9.t1  | OG0006556 | 90282..90940   |
| Scaffold 1275 10730306..1073170:HD002074 | OG0008346 | gi 817057993 ref XP_012269928.1 zinc finger protein 330 homolog [Athalia rosae]                      | Expect = 2.700e-140 | gene.scaffold_6122.g10.t1 | OG0008346 | 91228..92932   |
| Scaffold 1275 10732736..1073820:HD002075 | OG0006263 | gi 665809833 ref XP_008553302.1 PREDICTED: arrestin domain-containing protein 2 [Microplitis demc    | Expect = 3.600e-183 | gene.scaffold_6122.g11.t1 | OG0006263 | 93959..96475   |
| Scaffold 1275 10740693..1074533:HD002076 | OG0007281 | gi 1389758539 ref XP_024943813.1 synaptotagmin-4 isoform X2 [Cephus cinctus]                         | Expect = 4.500e-179 | gene.scaffold_6122.g12.t1 | OG0007281 | 101239..105178 |
| Scaffold 1275 10749875..1075318:HD002077 | OG0007282 | gi 970904570 ref XP_015118179.1 PREDICTED: dolichol kinase isoform X1 [Diachasma alloem]             | Expect = 2.900e-175 | gene.scaffold_6122.g14.t1 | OG0007282 | 110423..112817 |
| Scaffold 1275 10755559..1075930:HD002078 | OG0005355 | gi 936697175 ref XP_014226574.1 glucose-6-phosphate isomerase [Trichogramma pretiosum]               | Expect = 5.700e-287 | gene.scaffold_6122.g15.t1 | OG0005355 | 116428..120182 |
| Scaffold 1275 10761570..1076280:HD002079 | orphan    | IVSP_U15                                                                                             |                     |                           |           |                |
| Scaffold 1275 ///                        |           |                                                                                                      |                     |                           |           |                |
| Scaffold 1275 10785523..1078700:HD002089 | orphan    | IVSP_N-2                                                                                             |                     |                           |           |                |
| Scaffold 1275 10788460..1079089:HD002090 | OG0005583 | gi 1000723328 ref XP_015610175.1 probable cysteine--tRNA ligase, mitochondrial [Cephus cinctus]      | Expect = 7.000e-170 | gene.scaffold_6122.g28.t1 | OG0005583 | 158304..160353 |
| Scaffold 1275 10790972..1079279:HD002091 | OG0008727 | gi 1000723356 ref XP_015610186.1 ribosome production factor 2 homolog [Cephus cinctus]               | Expect = 5.600e-130 | gene.scaffold_6122.g29.t1 | OG0008727 | 160438..162016 |
| Scaffold 1275 10794756..1080633:HD002092 | OG0000882 | gi 820843698 ref XP_012340057.1 PREDICTED: protein polybromo-1 isoform X4 [Apis florea]              | Expect = 0.000e+0   | gene.scaffold_6122.g30.t1 | OG0000882 | 163578..176041 |
| Scaffold 1275 10808631..1080918:HD002093 | OG0004828 | gi 795054949 ref XP_011871354.1 PREDICTED: succinate dehydrogenase assembly factor 4, mitochondr     | Expect = 4.300e-21  | gene.scaffold_6122.g31.t1 | OG0004828 | 178896..179652 |
| Scaffold 1275 10809957..1081106:HD002094 | OG0006539 | gi 925679306 gb K0X76242.1  GPI mannosyltransferase 2 [Melipona quadrifasciata]                      | Expect = 2.200e-60  |                           |           |                |
| Scaffold 1275 10816751..1084960:HD002095 | OG0003603 | gi 1000760603 ref XP_015603308.1 angiopoietin-2 [Cephus cinctus] >gi 1389766659 ref XP_0249446C      | Expect = 4.400e-295 | gene.scaffold_6122.g32.t1 | OG0003603 | 208607..221477 |
| Scaffold 1275 10837195..1085690:HD002096 | OG0009828 | gi 1070171260 ref XP_018346064.1 PREDICTED: angiopoietin-4 isoform X2 [Trachymyrmex septentrion:     | Expect = 3.600e-220 | gene.scaffold_6122.g33.t1 | OG0009828 | 227997..231684 |
| Scaffold 1275 10859683..1086000:HD002097 | orphan    | no hit                                                                                               |                     |                           |           |                |
| Scaffold 1275 10860001..1086053:HD002098 | orphan    | IVSP_U35                                                                                             |                     | gene.scaffold_6122.g34.t1 | orphan    | 234803..235273 |
| Scaffold 1275 10861166..1086163:HD002099 | orphan    | IVSP_U36                                                                                             |                     |                           |           |                |
| Scaffold 1275 10862390..1086479:HD002100 | OG0006143 | gi 107268279 ref XP_015596389.1 PREDICTED: serine/threonine-protein kinase rio2 [Cephus cinctus]     |                     | gene.scaffold_6122.g37.t1 | OG0006143 | 241011..243008 |
| Scaffold 1275 10866093..1087121:HD002101 | OG0007135 | gi 749759480 ref XP_011141208.1 sorbitol dehydrogenase [Harpegnathos saltator]                       | Expect = 5.900e-157 | gene.scaffold_6122.g38.t1 | OG0007135 | 243912..249324 |
| Scaffold 1275 10872479..1087731:HD002102 | OG0007814 | gi 1569271860 gb Q8B02001.1  putative UPF0528 protein CG10038 [Cotesia chilonis]                     | Expect = 1.200e-113 | gene.scaffold_6122.g39.t1 | OG0007814 | 250807..256468 |
| Scaffold 1275 10921663..1092207:HD002103 | orphan    | no hit                                                                                               |                     |                           |           |                |
| Scaffold 1275 10970846..1103466:HD002104 | OG0002894 | gi 1494653095 gb RLU26944.1  hypothetical protein DMN91_000743 [Ooceraea biroii]                     | Expect = 1.500e-225 | gene.scaffold_6122.g40.t1 | OG0002894 | 361174..391485 |
| Scaffold 1275 10983515..1098646:HD002105 | orphan    | no hit                                                                                               |                     | NA                        |           |                |
| Scaffold 1275 11051421..1105729:HD002106 | OG0000642 | gi 972199364 ref XP_015181683.1 PREDICTED: serine/threonine-protein kinase tricornet isoform X1 [F   | Expect = 4.700e-266 | gene.scaffold_6095.g2.t1  | OG0000642 | 36848..43783   |
| Scaffold 1275 11089871..1109165:HD002107 | orphan    | no hit                                                                                               |                     | gene.scaffold_6095.g3.t1  | orphan    | 79134..81658   |
| Scaffold 1275 11110231..1111272:HD002108 | OG0000107 | gi 970917263 ref XP_015125099.1 PREDICTED: putative RNA-binding protein EEED8.10 [Diachasma all      | Expect = 8.200e-156 | gene.scaffold_6095.g5.t1  | OG0000107 | 105829..109141 |
| Scaffold 1275 11118585..1111968:HD002109 | OG0001394 | gi 1000769696 ref XP_015608031.1 dual specificity mitogen-activated protein kinase kinase dSOR1 isof | Expect = 1.300e-106 | gene.scaffold_6095.g6.t1  | OG0001394 | 113898..116393 |
| Scaffold 1275 11120053..1112313:HD002110 | OG0000139 | gi 156547818 ref XP_001606363.1 PREDICTED: sodium/potassium-transporting ATPase subunit alpha-       | Expect = 0.000e+0   | gene.scaffold_6095.g7.t1  | OG0000139 | 115279..118353 |
| Scaffold 1275 11123403..1112437:HD002111 | OG0001394 | gi 571503163 ref XP_393416.2  dual specificity mitogen-activated protein kinase kinase dSOR1 [Api    | Expect = 1.100e-91  | gene.scaffold_6095.g8.t1  | OG0001394 | 117396..119865 |
